# Supplementary material for: Can Machine Learning Algorithms Successfully Predict Grassland Aboveground Biomass?
Source: MDPI journal article supplement (doi:10.3390/rs14163843), 2022-08-09
Supplement: s1 [file s1]

# Can machine learning algorithms successfully predict grassland aboveground biomass?

Yue Wang<sup>1</sup>, Rongzhu Qin<sup>1</sup>, Huzi Cheng<sup>3</sup>, Tiangang Liang<sup>2</sup>, Kaiping Zhang<sup>1</sup>, Ning Chai<sup>1</sup>, Jinlong Gao<sup>2</sup>, Qisheng Feng<sup>2</sup>, Mengjing Hou<sup>2</sup>, Jie Liu<sup>2</sup>, Chenli Liu<sup>2</sup>, Wenjuan Zhang<sup>4</sup>, Yanjie Fang<sup>5</sup>, Jie Huang<sup>6</sup>, and Feng Zhang<sup>1,7,\*</sup>

<sup>1</sup> College of Ecology, Lanzhou University, Lanzhou 730000, China

<sup>2</sup> Laboratory for the Cognitive Control, Department of Psychological and Brain Sciences, Indiana University Bloomington, Bloomington, IN 47401, USA

<sup>3</sup> State Key Laboratory of Grassland Agro-Ecosystems, College of Pastoral Agriculture Science and Technology, Lanzhou University, Lanzhou 730020, China

<sup>4</sup> Institute of Qinghai Provincial Natural Resources Survey and Monitoring, Xining, Qinghai 810000, China

<sup>5</sup> Key Laboratory of High Water Utilization on Dryland of Gansu Province, Institute of Dryland Farming, Gansu Academy of Agricultural Sciences, Lanzhou 730070, China

<sup>6</sup> Animal Husbandry, Pasture and Green Agriculture Institute, Gansu Academy of Agricultural Sciences, Lanzhou 730000, China

<sup>7</sup> NAU-MSU Asia Hub, Nanjing Agricultural University, Nanjing 210095, China

\* Correspondence: zhangfeng@lzu.edu.cn (F.Z.)

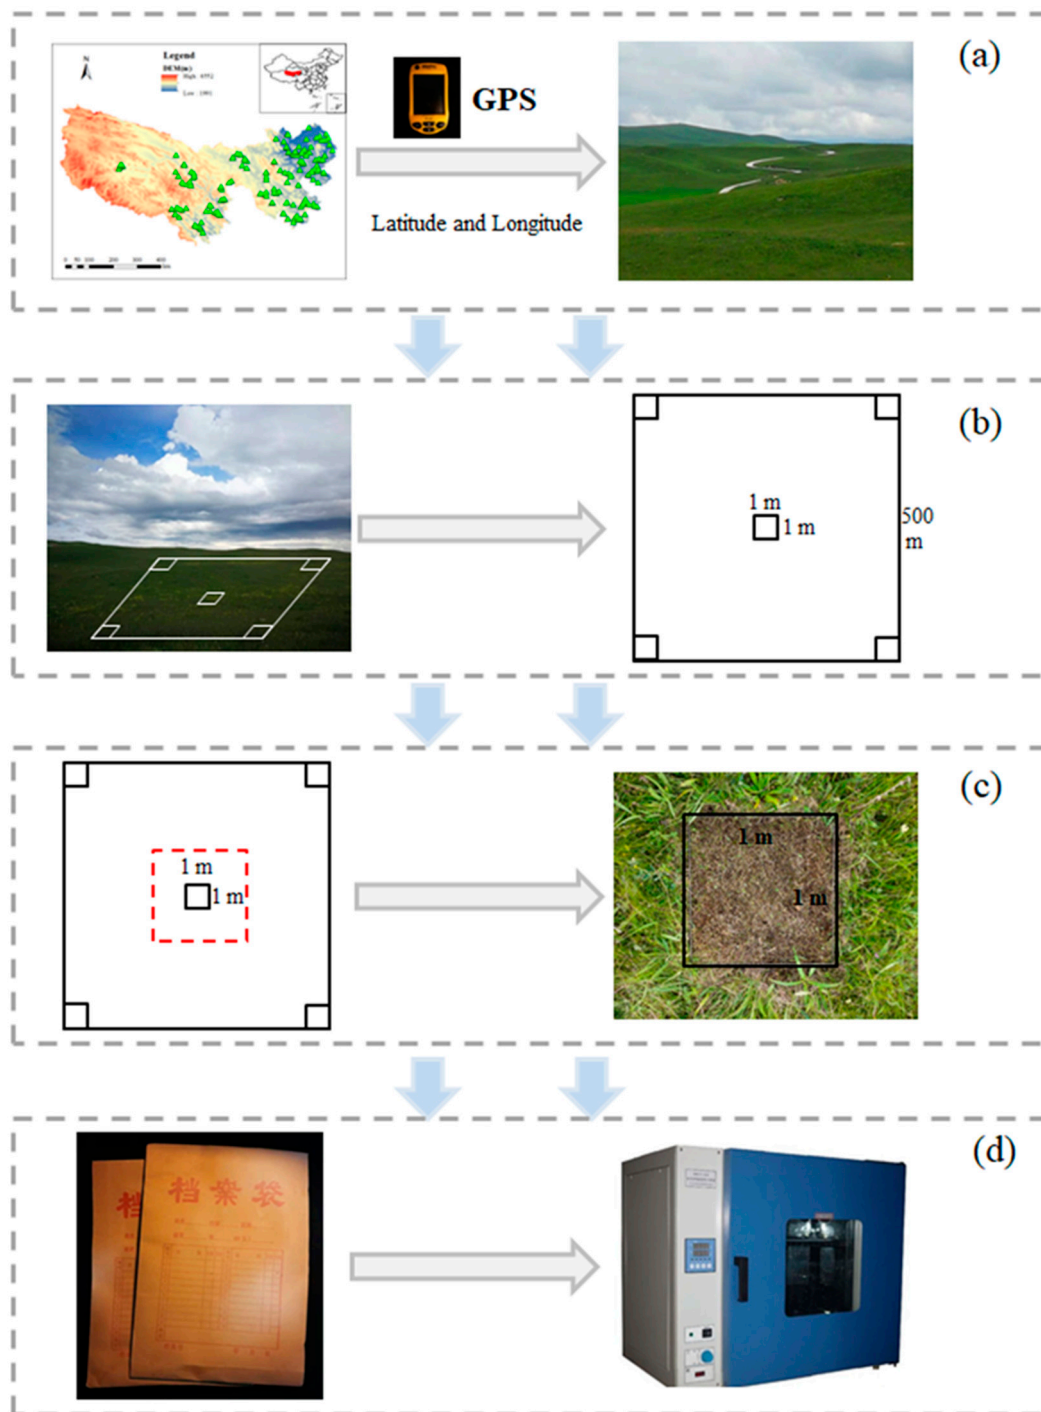

**Figure S1.** Schematic diagram of sampling in the TRHR.

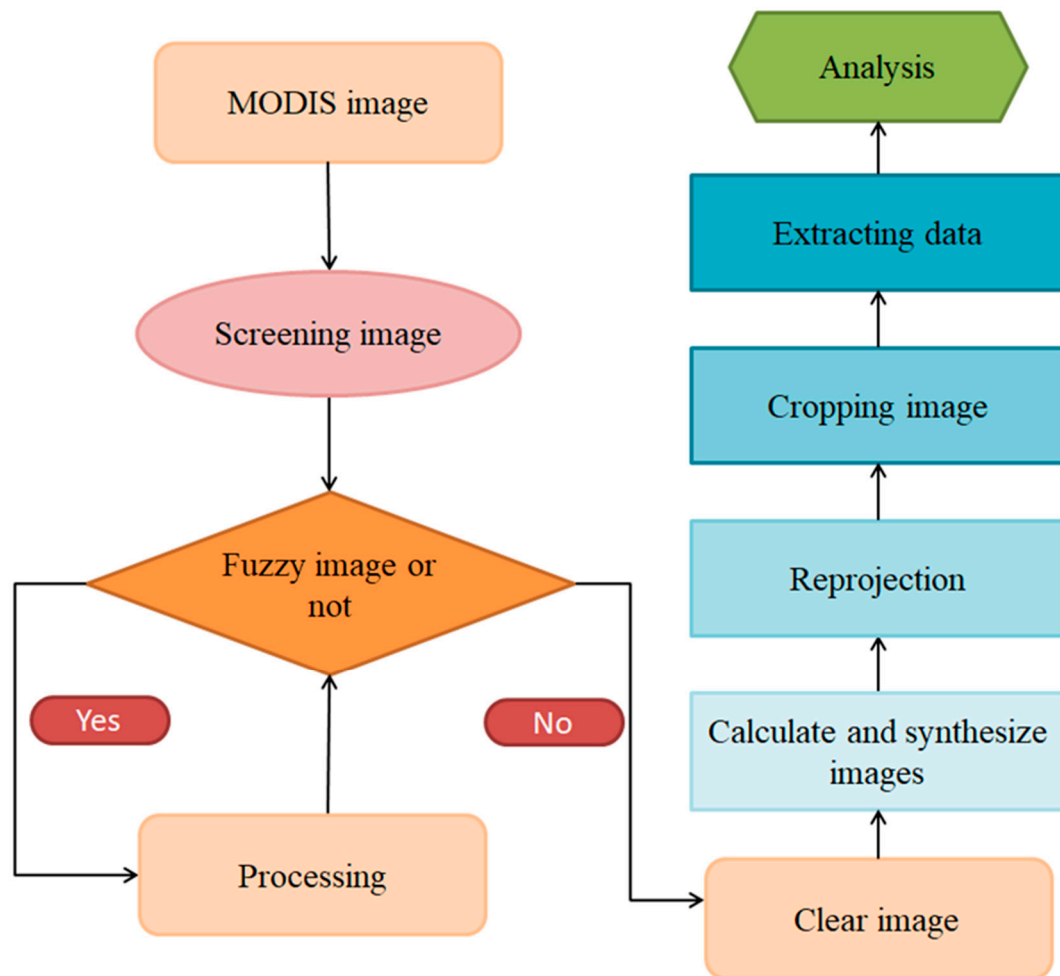

**Figure S2.** Flowchart illustrating the methodological steps undertaken to achieve the MODIS data processing in this study.

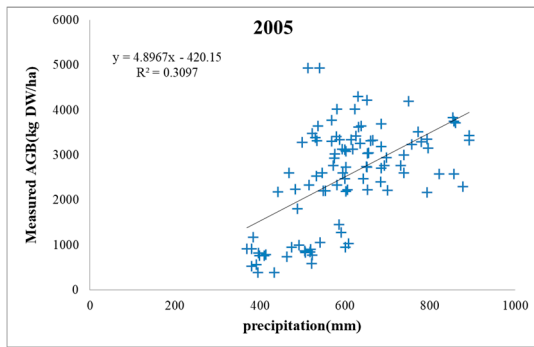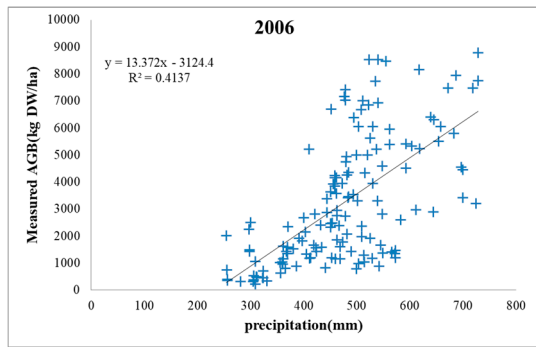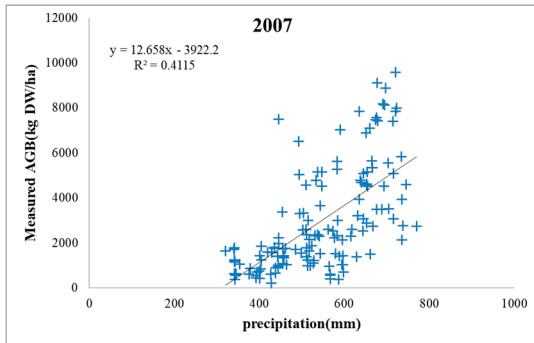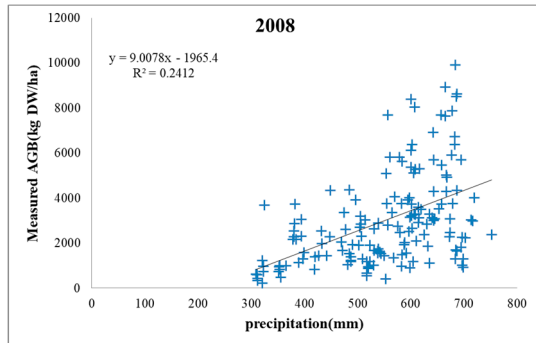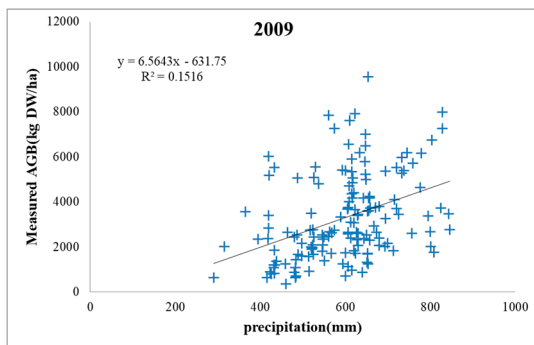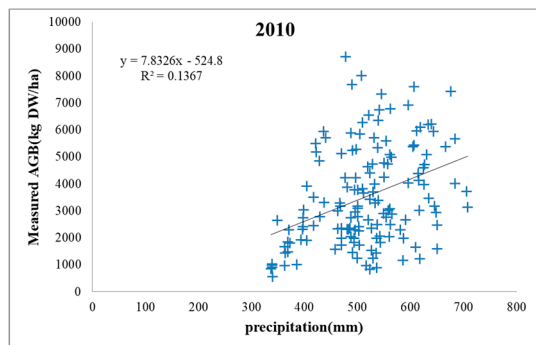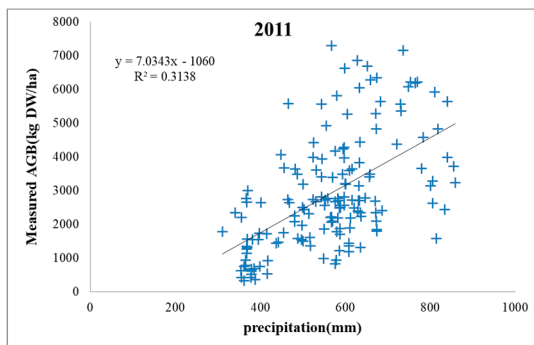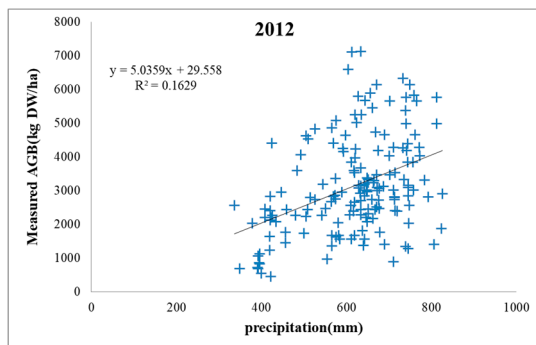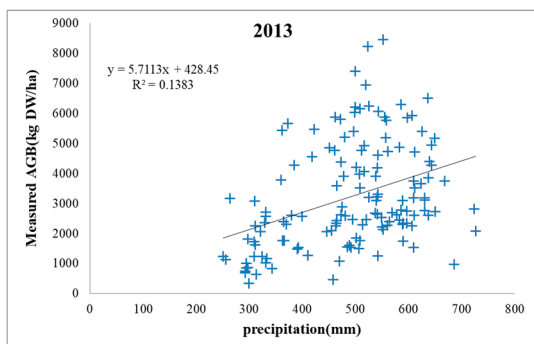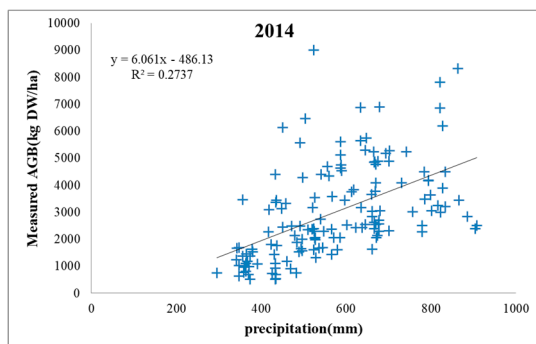

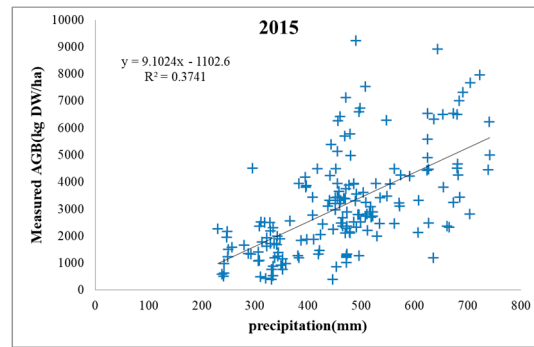

**Figure S3.** Correlation between grassland AGB and precipitation.

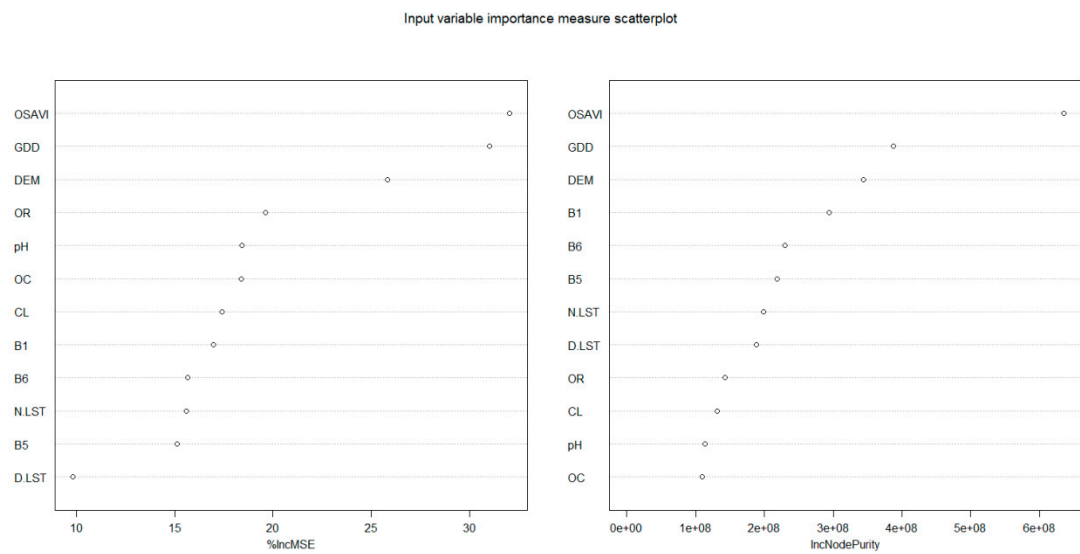

**Figure S4.** Input variable importance measure scatterplot.

**Table S1.** Research site information.

| latitude | longitude | county | the species of grassland | the organic carbon<br>stock (t/ha) | clay content<br>(%) | sand content<br>(%) |
|----------|-----------|--------|--------------------------|------------------------------------|---------------------|---------------------|
| 100.9443 | 35.39181  | zeku   | Stipa type               | 18                                 | 21                  | 31                  |
| 98.14411 | 34.94986  | maduo  | Stipa type               | 34                                 | 17                  | 56                  |
| 98.15    | 34.91667  | maduo  | Stipa type               | 32                                 | 17                  | 54                  |
| 97.91536 | 35.07503  | maduo  | Stipa type               | 33                                 | 17                  | 54                  |
| 97.78075 | 35.10983  | maduo  | Stipa type               | 34                                 | 18                  | 54                  |
| 98.25994 | 34.59783  | maduo  | Stipa type               | 43                                 | 17                  | 55                  |
| 100.9142 | 35.39169  | zeku   | Stipa type               | 26                                 | 18                  | 44                  |
| 101.1533 | 35.30397  | zeku   | Stipa type               | 20                                 | 19                  | 35                  |
| 97.60022 | 34.97658  | maduo  | Stipa type               | 32                                 | 19                  | 48                  |
| 97.91536 | 35.07503  | maduo  | Stipa type               | 33                                 | 17                  | 54                  |
| 100.9142 | 35.39169  | zeku   | Stipa type               | 26                                 | 18                  | 44                  |
| 100.9443 | 35.39181  | zeku   | Stipa type               | 18                                 | 21                  | 31                  |
| 101.8688 | 35.21619  | zeku   | Stipa type               | 25                                 | 17                  | 42                  |
| 98.14411 | 34.94986  | maduo  | Stipa type               | 34                                 | 17                  | 56                  |
| 98.14411 | 34.94986  | maduo  | Stipa type               | 34                                 | 17                  | 56                  |
| 97.78075 | 35.10983  | maduo  | Stipa type               | 34                                 | 18                  | 54                  |
| 98.26006 | 34.59789  | maduo  | Stipa type               | 43                                 | 17                  | 55                  |
| 98.14411 | 34.94986  | maduo  | Stipa type               | 28                                 | 17                  | 51                  |
| 97.60022 | 34.97658  | maduo  | Stipa type               | 32                                 | 19                  | 48                  |
| 100.9142 | 35.39169  | zeku   | Stipa type               | 26                                 | 18                  | 44                  |
| 100.9443 | 35.39181  | zeku   | Stipa type               | 18                                 | 21                  | 31                  |
| 97.60022 | 34.97658  | maduo  | Stipa type               | 32                                 | 19                  | 48                  |
| 98.26006 | 34.59789  | maduo  | Stipa type               | 43                                 | 17                  | 55                  |
| 97.78075 | 35.10983  | maduo  | Stipa type               | 34                                 | 18                  | 54                  |
| 100.9142 | 35.39169  | zeku   | Stipa type               | 43                                 | 20                  | 46                  |
| 101.1529 | 35.30389  | zeku   | Stipa type               | 20                                 | 19                  | 35                  |
| 98.14411 | 34.94986  | maduo  | Stipa type               | 34                                 | 17                  | 56                  |
| 98.16125 | 34.89928  | maduo  | Stipa type               | 28                                 | 17                  | 51                  |
| 98.14411 | 34.94986  | maduo  | Stipa type               | 15                                 | 16                  | 59                  |
| 100.9142 | 35.39169  | zeku   | Stipa type               | 26                                 | 18                  | 38                  |
| 101.1529 | 35.30389  | zeku   | Stipa type               | 20                                 | 19                  | 46                  |
| 98.14411 | 34.94986  | maduo  | Stipa type               | 34                                 | 17                  | 27                  |
| 97.60022 | 34.97658  | maduo  | Stipa type               | 32                                 | 19                  | 33                  |
| 98.26014 | 34.59792  | maduo  | Stipa type               | 43                                 | 17                  | 28                  |
| 97.78075 | 35.10983  | maduo  | Stipa type               | 34                                 | 18                  | 28                  |
| 100.9142 | 35.39169  | zeku   | Stipa type               | 22                                 | 14                  | 45                  |
| 100.9395 | 35.39186  | zeku   | Stipa type               | 18                                 | 21                  | 47                  |
| 98.16122 | 34.89928  | maduo  | Stipa type               | 28                                 | 17                  | 32                  |

|          |          |       |            |    |    |    |
|----------|----------|-------|------------|----|----|----|
| 97.93044 | 35.11294 | maduo | Stipa type | 27 | 18 | 27 |
| 100.9142 | 35.39169 | zeku  | Stipa type | 26 | 18 | 44 |
| 100.9395 | 35.39186 | zeku  | Stipa type | 18 | 21 | 32 |
| 101.1529 | 35.30389 | zeku  | Stipa type | 20 | 19 | 35 |
| 98.14411 | 34.94986 | maduo | Stipa type | 34 | 17 | 56 |
| 98.16122 | 34.89928 | maduo | Stipa type | 28 | 17 | 51 |
| 97.60022 | 34.97658 | maduo | Stipa type | 32 | 19 | 48 |
| 97.93044 | 35.11294 | maduo | Stipa type | 27 | 18 | 55 |
| 97.78075 | 35.10983 | maduo | Stipa type | 34 | 18 | 54 |
| 101.1529 | 35.30389 | zeku  | Stipa type | 20 | 19 | 35 |
| 100.9142 | 35.39169 | zeku  | Stipa type | 26 | 18 | 44 |
| 100.9395 | 35.39186 | zeku  | Stipa type | 18 | 21 | 32 |
| 97.60022 | 34.97658 | maduo | Stipa type | 32 | 19 | 48 |
| 98.26014 | 34.59792 | maduo | Stipa type | 43 | 17 | 55 |
| 100.9395 | 35.39186 | zeku  | Stipa type | 18 | 21 | 32 |
| 101.1543 | 35.30367 | zeku  | Stipa type | 20 | 19 | 35 |
| 98.14411 | 34.94986 | maduo | Stipa type | 34 | 17 | 56 |
| 97.93044 | 35.11294 | maduo | Stipa type | 27 | 18 | 55 |
| 97.78075 | 35.10983 | maduo | Stipa type | 34 | 18 | 54 |
| 100.9142 | 35.39169 | zeku  | Stipa type | 26 | 18 | 44 |
| 98.16122 | 34.89928 | maduo | Stipa type | 28 | 17 | 51 |
| 97.60022 | 34.97658 | maduo | Stipa type | 32 | 19 | 48 |
| 98.26014 | 34.59792 | maduo | Stipa type | 43 | 17 | 55 |
| 98.05767 | 34.68269 | maduo | Stipa type | 39 | 16 | 55 |
| 97.93044 | 35.11294 | maduo | Stipa type | 27 | 18 | 55 |
| 100.9142 | 35.39169 | zeku  | Stipa type | 26 | 18 | 44 |
| 98.14411 | 34.94986 | maduo | Stipa type | 34 | 17 | 56 |
| 98.16122 | 34.89928 | maduo | Stipa type | 28 | 17 | 51 |
| 98.26014 | 34.59792 | maduo | Stipa type | 43 | 17 | 55 |
| 100.9395 | 35.39186 | zeku  | Stipa type | 18 | 21 | 32 |
| 97.60022 | 34.97658 | maduo | Stipa type | 32 | 19 | 48 |
| 97.78075 | 35.10983 | maduo | Stipa type | 34 | 18 | 54 |
| 98.05767 | 34.68269 | maduo | Stipa type | 39 | 16 | 55 |
| 100.9142 | 35.39169 | zeku  | Stipa type | 26 | 18 | 44 |
| 100.9395 | 35.39186 | zeku  | Stipa type | 18 | 21 | 32 |
| 101.1543 | 35.30367 | zeku  | Stipa type | 20 | 19 | 35 |
| 98.14411 | 34.94986 | maduo | Stipa type | 34 | 17 | 56 |
| 98.16122 | 34.89928 | maduo | Stipa type | 28 | 17 | 51 |
| 97.60022 | 34.97658 | maduo | Stipa type | 32 | 19 | 48 |
| 97.93044 | 35.11294 | maduo | Stipa type | 27 | 18 | 55 |
| 97.78075 | 35.11289 | maduo | Stipa type | 24 | 16 | 53 |
| 98.16122 | 34.89928 | maduo | Stipa type | 35 | 18 | 53 |
| 100.9142 | 35.39169 | zeku  | Stipa type | 26 | 18 | 44 |
| 101.1543 | 35.30367 | zeku  | Stipa type | 20 | 19 | 35 |



|          |          |         |                           |    |    |    |
|----------|----------|---------|---------------------------|----|----|----|
| 98.14411 | 34.94986 | maduo   | Stipa type                | 34 | 17 | 56 |
| 98.16122 | 34.89928 | maduo   | Stipa type                | 28 | 17 | 51 |
| 97.60022 | 34.97658 | maduo   | Stipa type                | 32 | 19 | 48 |
| 97.93044 | 35.11294 | maduo   | Stipa type                | 27 | 18 | 55 |
| 97.77308 | 35.10983 | maduo   | Stipa type                | 35 | 17 | 56 |
| 98.26014 | 34.59792 | maduo   | Stipa type                | 43 | 17 | 55 |
| 100.9142 | 35.39169 | zeku    | Stipa type                | 34 | 22 | 45 |
| 97.77308 | 35.10983 | maduo   | Stipa type                | 17 | 20 | 32 |
| 100.9142 | 35.39169 | zeku    | Stipa type                | 26 | 18 | 44 |
| 101.1543 | 35.30367 | zeku    | Stipa type                | 20 | 19 | 35 |
| 98.16122 | 34.89928 | maduo   | Stipa type                | 28 | 17 | 51 |
| 97.60022 | 34.97658 | maduo   | Stipa type                | 32 | 19 | 48 |
| 97.78075 | 35.10983 | maduo   | Stipa type                | 34 | 18 | 54 |
| 98.26014 | 34.59792 | maduo   | Stipa type                | 43 | 17 | 55 |
| 95.34772 | 34.55439 | qumalai | Stipa purpurea, bluegrass | 35 | 18 | 53 |
| 95.34772 | 34.55439 | qumalai | Stipa purpurea, bluegrass | 35 | 18 | 53 |
| 95.34772 | 34.55439 | qumalai | Stipa purpurea, bluegrass | 35 | 18 | 29 |
| 95.34772 | 34.55439 | qumalai | Stipa purpurea, bluegrass | 35 | 18 | 53 |
| 95.34772 | 34.55439 | qumalai | Stipa purpurea, bluegrass | 35 | 18 | 53 |
| 95.34772 | 34.55439 | qumalai | Stipa purpurea, bluegrass | 35 | 18 | 53 |
| 95.34772 | 34.55439 | qumalai | Stipa purpurea, bluegrass | 35 | 18 | 53 |
| 95.34772 | 34.55439 | qumalai | Stipa purpurea, bluegrass | 35 | 18 | 53 |
| 95.34772 | 34.55439 | qumalai | Stipa purpurea, bluegrass | 35 | 18 | 53 |
| 92.42803 | 34.27606 | geermu  | Stipa purpurea, weeds     | 33 | 17 | 58 |
| 95.715   | 34.2965  | qumalai | Stipa purpurea, weeds     | 22 | 18 | 45 |
| 92.45758 | 34.19031 | geermu  | Stipa purpurea, weeds     | 35 | 15 | 58 |
| 92.42789 | 34.27603 | geermu  | Stipa purpurea, weeds     | 33 | 17 | 58 |
| 92.42803 | 34.27606 | geermu  | Stipa purpurea, weeds     | 22 | 14 | 45 |
| 97.57422 | 34.93242 | maduo   | Stipa purpurea, weeds     | 32 | 19 | 51 |
| 97.57486 | 34.93336 | maduo   | Stipa purpurea, weeds     | 33 | 18 | 51 |
| 97.77308 | 35.11289 | maduo   | Stipa purpurea, weeds     | 32 | 17 | 55 |
| 95.34753 | 34.55267 | qumalai | Stipa purpurea, weeds     | 35 | 18 | 53 |
| 95.36436 | 34.53969 | qumalai | Stipa purpurea, weeds     | 36 | 18 | 54 |
| 95.36436 | 34.53969 | qumalai | Stipa purpurea, weeds     | 47 | 19 | 47 |
| 92.499   | 34.27158 | geermu  | Stipa purpurea, weeds     | 15 | 16 | 59 |
| 92.42789 | 34.27603 | geermu  | Stipa purpurea, weeds     | 33 | 17 | 58 |
| 94.94906 | 34.86    | qumalai | Stipa purpurea, weeds     | 18 | 15 | 42 |
| 95.76317 | 33.79247 | zhiduo  | Stipa purpurea, weeds     | 35 | 20 | 52 |
| 92.42803 | 34.27606 | geermu  | Stipa purpurea, weeds     | 33 | 17 | 58 |
| 95.71622 | 34.29597 | qumalai | Stipa purpurea, weeds     | 22 | 18 | 45 |
| 95.36297 | 34.54394 | qumalai | Stipa purpurea, weeds     | 34 | 18 | 54 |
| 97.57486 | 34.93336 | maduo   | Stipa purpurea, weeds     | 33 | 18 | 51 |
| 95.34753 | 34.55267 | qumalai | Stipa purpurea, weeds     | 35 | 18 | 53 |
| 95.36436 | 34.53969 | qumalai | Stipa purpurea, weeds     | 36 | 18 | 54 |

|          |          |         |                       |    |    |    |
|----------|----------|---------|-----------------------|----|----|----|
| 92.42511 | 34.21236 | geermu  | Stipa purpurea, weeds | 37 | 16 | 59 |
| 92.42803 | 34.27606 | geermu  | Stipa purpurea, weeds | 33 | 17 | 58 |
| 92.52928 | 34.22322 | geermu  | Stipa purpurea, weeds | 31 | 13 | 57 |
| 95.71622 | 34.29597 | qumalai | Stipa purpurea, weeds | 22 | 18 | 45 |
| 92.499   | 34.27158 | geermu  | Stipa purpurea, weeds | 15 | 16 | 59 |
| 92.42789 | 34.27603 | geermu  | Stipa purpurea, weeds | 33 | 17 | 58 |
| 95.36297 | 34.54394 | qumalai | Stipa purpurea, weeds | 34 | 18 | 54 |
| 95.76317 | 33.79247 | zhiduo  | Stipa purpurea, weeds | 35 | 20 | 52 |
| 92.42803 | 34.27606 | geermu  | Stipa purpurea, weeds | 22 | 14 | 44 |
| 92.42803 | 34.27606 | geermu  | Stipa purpurea, weeds | 33 | 17 | 26 |
| 92.52928 | 34.22322 | geermu  | Stipa purpurea, weeds | 31 | 13 | 30 |
| 97.77308 | 35.11289 | maduo   | Stipa purpurea, weeds | 32 | 17 | 29 |
| 95.71622 | 34.29597 | qumalai | Stipa purpurea, weeds | 22 | 18 | 37 |
| 95.34753 | 34.55267 | qumalai | Stipa purpurea, weeds | 35 | 18 | 29 |
| 95.76317 | 33.79247 | zhiduo  | Stipa purpurea, weeds | 35 | 20 | 29 |
| 92.42789 | 34.27603 | geermu  | Stipa purpurea, weeds | 35 | 18 | 53 |
| 97.57486 | 34.93336 | maduo   | Stipa purpurea, weeds | 33 | 18 | 30 |
| 95.36436 | 34.53969 | qumalai | Stipa purpurea, weeds | 36 | 18 | 28 |
| 92.499   | 34.27158 | geermu  | Stipa purpurea, weeds | 15 | 16 | 25 |
| 92.42789 | 34.27603 | geermu  | Stipa purpurea, weeds | 33 | 17 | 26 |
| 92.42511 | 34.21236 | geermu  | Stipa purpurea, weeds | 37 | 16 | 25 |
| 94.94906 | 34.86    | qumalai | Stipa purpurea, weeds | 18 | 15 | 42 |
| 95.36297 | 34.54394 | qumalai | Stipa purpurea, weeds | 34 | 18 | 28 |
| 95.36436 | 34.53969 | qumalai | Stipa purpurea, weeds | 17 | 17 | 44 |
| 92.52928 | 34.22322 | geermu  | Stipa purpurea, weeds | 31 | 13 | 57 |
| 97.57486 | 34.93336 | maduo   | Stipa purpurea, weeds | 33 | 18 | 51 |
| 97.77308 | 35.11289 | maduo   | Stipa purpurea, weeds | 32 | 17 | 55 |
| 95.71622 | 34.29597 | qumalai | Stipa purpurea, weeds | 22 | 18 | 45 |
| 95.34753 | 34.55267 | qumalai | Stipa purpurea, weeds | 35 | 18 | 53 |
| 95.36436 | 34.53969 | qumalai | Stipa purpurea, weeds | 36 | 18 | 54 |
| 92.48786 | 34.27158 | geermu  | Stipa purpurea, weeds | 17 | 15 | 60 |
| 92.42511 | 34.21236 | geermu  | Stipa purpurea, weeds | 37 | 16 | 59 |
| 94.94906 | 34.86    | qumalai | Stipa purpurea, weeds | 18 | 15 | 42 |
| 95.76317 | 33.79247 | zhiduo  | Stipa purpurea, weeds | 35 | 20 | 52 |
| 92.52928 | 34.22322 | geermu  | Stipa purpurea, weeds | 35 | 20 | 50 |
| 95.36297 | 34.54394 | qumalai | Stipa purpurea, weeds | 34 | 18 | 54 |
| 92.42789 | 34.27603 | geermu  | Stipa purpurea, weeds | 33 | 17 | 58 |
| 92.52928 | 34.22322 | geermu  | Stipa purpurea, weeds | 15 | 16 | 59 |
| 92.42803 | 34.27606 | geermu  | Stipa purpurea, weeds | 33 | 17 | 58 |
| 92.52928 | 34.22322 | geermu  | Stipa purpurea, weeds | 31 | 13 | 57 |
| 95.71622 | 34.29597 | qumalai | Stipa purpurea, weeds | 22 | 18 | 45 |
| 95.34753 | 34.55267 | qumalai | Stipa purpurea, weeds | 35 | 18 | 53 |
| 95.36436 | 34.53969 | qumalai | Stipa purpurea, weeds | 36 | 18 | 54 |
| 92.42789 | 34.27603 | geermu  | Stipa purpurea, weeds | 33 | 17 | 58 |

|          |          |         |                       |    |    |    |
|----------|----------|---------|-----------------------|----|----|----|
| 92.42511 | 34.21236 | geermu  | Stipa purpurea, weeds | 37 | 16 | 59 |
| 94.94906 | 34.86    | qumalai | Stipa purpurea, weeds | 18 | 15 | 42 |
| 97.57486 | 34.93336 | maduo   | Stipa purpurea, weeds | 33 | 18 | 51 |
| 92.499   | 34.27158 | geermu  | Stipa purpurea, weeds | 15 | 16 | 59 |
| 95.36297 | 34.54394 | qumalai | Stipa purpurea, weeds | 34 | 18 | 54 |
| 95.76317 | 33.79247 | zhiduo  | Stipa purpurea, weeds | 35 | 20 | 52 |
| 92.42803 | 34.27606 | geermu  | Stipa purpurea, weeds | 33 | 17 | 58 |
| 92.52928 | 34.22322 | geermu  | Stipa purpurea, weeds | 31 | 13 | 57 |
| 97.57486 | 34.93336 | maduo   | Stipa purpurea, weeds | 33 | 18 | 51 |
| 97.77308 | 35.11289 | maduo   | Stipa purpurea, weeds | 32 | 17 | 55 |
| 95.71622 | 34.29597 | qumalai | Stipa purpurea, weeds | 22 | 18 | 45 |
| 95.34753 | 34.55267 | qumalai | Stipa purpurea, weeds | 35 | 18 | 53 |
| 92.42789 | 34.27603 | geermu  | Stipa purpurea, weeds | 33 | 17 | 58 |
| 92.42511 | 34.21236 | geermu  | Stipa purpurea, weeds | 37 | 16 | 59 |
| 94.94906 | 34.86    | qumalai | Stipa purpurea, weeds | 18 | 15 | 42 |
| 92.41683 | 34.21889 | geermu  | Stipa purpurea, weeds | 39 | 15 | 60 |
| 95.36436 | 34.53969 | qumalai | Stipa purpurea, weeds | 36 | 18 | 54 |
| 95.36297 | 34.54394 | qumalai | Stipa purpurea, weeds | 34 | 18 | 54 |
| 95.76317 | 33.79247 | zhiduo  | Stipa purpurea, weeds | 35 | 20 | 52 |
| 97.57486 | 34.93336 | maduo   | Stipa purpurea, weeds | 33 | 18 | 51 |
| 97.77308 | 35.11289 | maduo   | Stipa purpurea, weeds | 32 | 17 | 55 |
| 95.71622 | 34.29597 | qumalai | Stipa purpurea, weeds | 22 | 18 | 45 |
| 95.34753 | 34.55267 | qumalai | Stipa purpurea, weeds | 35 | 18 | 53 |
| 95.36436 | 34.53969 | qumalai | Stipa purpurea, weeds | 36 | 18 | 54 |
| 92.499   | 34.27158 | geermu  | Stipa purpurea, weeds | 15 | 16 | 59 |
| 95.36297 | 34.54394 | qumalai | Stipa purpurea, weeds | 34 | 18 | 54 |
| 95.76317 | 33.79247 | zhiduo  | Stipa purpurea, weeds | 35 | 20 | 52 |
| 95.34753 | 34.55267 | qumalai | Stipa purpurea, weeds | 16 | 19 | 40 |
| 97.57486 | 34.93336 | maduo   | Stipa purpurea, weeds | 22 | 14 | 45 |
| 97.57486 | 34.93336 | maduo   | Stipa purpurea, weeds | 33 | 18 | 51 |
| 97.77308 | 35.11289 | maduo   | Stipa purpurea, weeds | 32 | 17 | 55 |
| 97.57486 | 34.93336 | maduo   | Stipa purpurea, weeds | 33 | 18 | 51 |
| 95.71622 | 34.29597 | qumalai | Stipa purpurea, weeds | 22 | 18 | 45 |
| 95.34753 | 34.55267 | qumalai | Stipa purpurea, weeds | 35 | 18 | 53 |
| 94.94906 | 34.86    | qumalai | Stipa purpurea, weeds | 18 | 15 | 42 |
| 95.76317 | 33.79247 | zhiduo  | Stipa purpurea, weeds | 35 | 20 | 52 |
| 95.36436 | 34.53969 | qumalai | Stipa purpurea, weeds | 36 | 18 | 54 |
| 97.93044 | 35.11289 | maduo   | Stipa purpurea, weeds | 34 | 17 | 54 |
| 92.42803 | 34.27606 | geermu  | Stipa purpurea, weeds | 33 | 17 | 58 |
| 92.41683 | 34.21889 | geermu  | Stipa purpurea, weeds | 39 | 15 | 60 |
| 92.52928 | 34.22322 | geermu  | Stipa purpurea, weeds | 31 | 13 | 57 |
| 97.57486 | 34.93336 | maduo   | Stipa purpurea, weeds | 33 | 18 | 51 |
| 97.93044 | 35.11289 | maduo   | Stipa purpurea, weeds | 27 | 18 | 55 |
| 97.77308 | 35.11289 | maduo   | Stipa purpurea, weeds | 32 | 17 | 55 |

|          |          |          |                       |    |    |    |
|----------|----------|----------|-----------------------|----|----|----|
| 95.71622 | 34.29597 | qumalai  | Stipa purpurea, weeds | 22 | 18 | 45 |
| 95.34753 | 34.55267 | qumalai  | Stipa purpurea, weeds | 35 | 18 | 53 |
| 95.36436 | 34.53969 | qumalai  | Stipa purpurea, weeds | 36 | 18 | 54 |
| 92.499   | 34.27158 | geermu   | Stipa purpurea, weeds | 15 | 16 | 59 |
| 92.42789 | 34.27603 | geermu   | Stipa purpurea, weeds | 33 | 17 | 58 |
| 92.42511 | 34.21236 | geermu   | Stipa purpurea, weeds | 37 | 16 | 59 |
| 95.76317 | 33.79247 | zhiduo   | Stipa purpurea, weeds | 35 | 20 | 52 |
| 92.499   | 34.27158 | geermu   | Stipa purpurea, weeds | 25 | 20 | 43 |
| 92.42803 | 34.27606 | geermu   | Stipa purpurea, weeds | 33 | 17 | 58 |
| 92.41683 | 34.21889 | geermu   | Stipa purpurea, weeds | 39 | 15 | 60 |
| 97.57486 | 34.93336 | maduo    | Stipa purpurea, weeds | 33 | 18 | 51 |
| 97.77308 | 35.11289 | maduo    | Stipa purpurea, weeds | 32 | 17 | 55 |
| 99.20031 | 34.34536 | maqin    | Stipa purpurea, weeds | 18 | 6  | 75 |
| 95.71622 | 34.29597 | qumalai  | Stipa purpurea, weeds | 22 | 18 | 45 |
| 95.36436 | 34.53969 | qumalai  | Stipa purpurea, weeds | 36 | 18 | 54 |
| 92.499   | 34.27158 | geermu   | Stipa purpurea, weeds | 15 | 16 | 59 |
| 92.42789 | 34.27603 | geermu   | Stipa purpurea, weeds | 33 | 17 | 58 |
| 94.94906 | 34.86    | qumalai  | Stipa purpurea, weeds | 18 | 15 | 42 |
| 95.36297 | 34.54394 | qumalai  | Stipa purpurea, weeds | 34 | 18 | 54 |
| 102.3087 | 35.49506 | tongren  | Stipa purpurea, weeds | 46 | 20 | 33 |
| 101.9082 | 36.02006 | jianzha  | Stipa purpurea, weeds | 16 | 20 | 39 |
| 102.0951 | 35.61711 | tongren  | Stipa purpurea, weeds | 6  | 19 | 44 |
| 98.27017 | 34.86236 | maduo    | weeds                 | 33 | 16 | 54 |
| 96.39028 | 32.22264 | nangqian | weeds                 | 19 | 22 | 39 |
| 96.39047 | 32.22267 | nangqian | weeds                 | 19 | 22 | 39 |
| 96.39028 | 32.20597 | nangqian | weeds                 | 23 | 24 | 37 |
| 96.39047 | 32.22267 | nangqian | weeds                 | 19 | 22 | 40 |
| 101.3001 | 34.57553 | henan    | weeds                 | 25 | 21 | 41 |
| 96.39028 | 32.20597 | nangqian | weeds                 | 23 | 24 | 38 |
| 101.3001 | 34.57553 | henan    | weeds                 | 25 | 21 | 39 |
| 96.39047 | 32.22267 | nangqian | weeds                 | 19 | 22 | 39 |
| 96.39028 | 32.20597 | nangqian | weeds                 | 23 | 24 | 37 |
| 101.3001 | 34.57553 | henan    | weeds                 | 25 | 21 | 39 |
| 101.3001 | 34.57553 | henan    | weeds                 | 25 | 21 | 39 |
| 101.3001 | 34.57553 | henan    | weeds                 | 25 | 21 | 39 |
| 101.3001 | 34.57553 | henan    | weeds                 | 25 | 21 | 39 |
| 101.1477 | 34.48297 | henan    | Line-leaf turmeric    | 27 | 20 | 40 |
| 95.36717 | 32.5865  | zaduo    | Line-leaf turmeric    | 30 | 20 | 49 |
| 101.3001 | 34.62144 | henan    | Line-leaf turmeric    | 43 | 22 | 45 |
| 101.5082 | 33.30869 | jiuzhi   | Line-leaf turmeric    | 39 | 20 | 49 |
| 98.96917 | 33.68694 | dari     | Line-leaf turmeric    | 48 | 18 | 54 |
| 96.77    | 33.10139 | yushu    | Line-leaf turmeric    | 41 | 21 | 50 |
| 95.36717 | 32.5865  | zaduo    | Line-leaf turmeric    | 30 | 20 | 49 |
| 101.1235 | 34.45589 | henan    | Line-leaf turmeric    | 42 | 22 | 45 |

|          |          |        |                    |    |    |    |
|----------|----------|--------|--------------------|----|----|----|
| 101.3833 | 34.3     | henan  | Line-leaf turmeric | 27 | 22 | 32 |
| 101.5302 | 34.83353 | henan  | Line-leaf turmeric | 28 | 18 | 42 |
| 100.9497 | 33.36225 | jiuzhi | Line-leaf turmeric | 48 | 20 | 49 |
| 100.9497 | 33.36225 | jiuzhi | Line-leaf turmeric | 48 | 20 | 49 |
| 101.3833 | 34.3     | henan  | Line-leaf turmeric | 27 | 22 | 32 |
| 101.55   | 34.63333 | henan  | Line-leaf turmeric | 20 | 24 | 25 |
| 101.5082 | 33.30869 | jiuzhi | Line-leaf turmeric | 39 | 20 | 49 |
| 98.96917 | 33.68694 | dari   | Line-leaf turmeric | 48 | 18 | 54 |
| 96.76861 | 33.10139 | yushu  | Line-leaf turmeric | 40 | 21 | 49 |
| 95.36717 | 32.5865  | zaduo  | Line-leaf turmeric | 30 | 20 | 49 |
| 101.1235 | 34.45589 | henan  | Line-leaf turmeric | 42 | 22 | 45 |
| 101.3001 | 34.62144 | henan  | Line-leaf turmeric | 43 | 22 | 45 |
| 101.8833 | 34.55    | henan  | Line-leaf turmeric | 31 | 19 | 40 |
| 101.3833 | 34.3     | henan  | Line-leaf turmeric | 27 | 22 | 46 |
| 101.5302 | 34.83353 | henan  | Line-leaf turmeric | 28 | 18 | 40 |
| 101.5971 | 34.69983 | henan  | Line-leaf turmeric | 18 | 21 | 48 |
| 101.5966 | 34.70006 | henan  | Line-leaf turmeric | 18 | 21 | 48 |
| 101.5082 | 33.30869 | jiuzhi | Line-leaf turmeric | 39 | 20 | 31 |
| 100.9497 | 33.36225 | jiuzhi | Line-leaf turmeric | 48 | 20 | 30 |
| 101.3849 | 34.30553 | henan  | Line-leaf turmeric | 19 | 22 | 50 |
| 101.1488 | 34.48019 | henan  | Line-leaf turmeric | 26 | 20 | 40 |
| 96.76861 | 33.10139 | yushu  | Line-leaf turmeric | 40 | 21 | 30 |
| 95.36717 | 32.5865  | zaduo  | Line-leaf turmeric | 30 | 20 | 31 |
| 95.36717 | 32.5865  | zaduo  | Line-leaf turmeric | 33 | 20 | 51 |
| 101.3849 | 34.30553 | henan  | Line-leaf turmeric | 19 | 22 | 28 |
| 101.1488 | 34.48019 | henan  | Line-leaf turmeric | 26 | 20 | 40 |
| 101.5302 | 34.83353 | henan  | Line-leaf turmeric | 28 | 18 | 42 |
| 101.5971 | 34.69983 | henan  | Line-leaf turmeric | 18 | 21 | 30 |
| 101.5082 | 33.30869 | jiuzhi | Line-leaf turmeric | 39 | 20 | 49 |
| 100.9497 | 33.36225 | jiuzhi | Line-leaf turmeric | 48 | 20 | 49 |
| 95.36717 | 32.5865  | zaduo  | Line-leaf turmeric | 30 | 20 | 49 |
| 101.3833 | 34.3     | henan  | Line-leaf turmeric | 27 | 22 | 32 |
| 101.5966 | 34.70006 | henan  | Line-leaf turmeric | 18 | 21 | 30 |
| 101.3833 | 34.3     | henan  | Line-leaf turmeric | 27 | 22 | 32 |
| 99.82975 | 34.59606 | maqin  | Line-leaf turmeric | 58 | 21 | 46 |
| 101.3001 | 34.62144 | henan  | Line-leaf turmeric | 43 | 22 | 45 |
| 101.5966 | 34.70006 | henan  | Line-leaf turmeric | 18 | 21 | 30 |
| 101.5082 | 33.30869 | jiuzhi | Line-leaf turmeric | 39 | 20 | 49 |
| 95.36717 | 32.5865  | zaduo  | Line-leaf turmeric | 30 | 20 | 49 |
| 100.9497 | 33.36225 | jiuzhi | Line-leaf turmeric | 22 | 14 | 45 |
| 101.3849 | 34.30553 | henan  | Line-leaf turmeric | 19 | 22 | 28 |
| 101.1488 | 34.48019 | henan  | Line-leaf turmeric | 26 | 20 | 40 |
| 101.5302 | 34.83353 | henan  | Line-leaf turmeric | 28 | 18 | 42 |
| 101.5971 | 34.69983 | henan  | Line-leaf turmeric | 18 | 21 | 30 |

|          |          |        |                                        |    |    |    |
|----------|----------|--------|----------------------------------------|----|----|----|
| 100.9497 | 33.36225 | jiuzhi | Line-leaf turmeric                     | 48 | 20 | 49 |
| 101.3849 | 34.30553 | henan  | Line-leaf turmeric                     | 19 | 22 | 28 |
| 101.1488 | 34.48019 | henan  | Line-leaf turmeric                     | 26 | 20 | 40 |
| 101.5971 | 34.69983 | henan  | Line-leaf turmeric                     | 18 | 21 | 30 |
| 101.5966 | 34.70006 | henan  | Line-leaf turmeric                     | 18 | 21 | 30 |
| 101.5082 | 33.30869 | jiuzhi | Line-leaf turmeric                     | 39 | 20 | 49 |
| 101.3833 | 34.3     | henan  | Line-leaf turmeric                     | 27 | 22 | 32 |
| 101.5302 | 34.83353 | henan  | Line-leaf turmeric                     | 28 | 18 | 42 |
| 96.76861 | 33.10139 | yushu  | Line-leaf turmeric                     | 40 | 21 | 49 |
| 95.36717 | 32.5865  | zaduo  | Line-leaf turmeric                     | 30 | 20 | 49 |
| 101.3833 | 34.3     | henan  | Line-leaf turmeric                     | 25 | 15 | 42 |
| 101.3849 | 34.30553 | henan  | Line-leaf turmeric                     | 19 | 22 | 28 |
| 101.1488 | 34.48019 | henan  | Line-leaf turmeric                     | 26 | 20 | 40 |
| 101.3833 | 34.3     | henan  | Line-leaf turmeric                     | 27 | 22 | 32 |
| 101.5971 | 34.69983 | henan  | Line-leaf turmeric                     | 18 | 21 | 30 |
| 101.5966 | 34.70006 | henan  | Line-leaf turmeric                     | 18 | 21 | 30 |
| 101.5082 | 33.30869 | jiuzhi | Line-leaf turmeric                     | 39 | 20 | 49 |
| 100.9497 | 33.36225 | jiuzhi | Line-leaf turmeric                     | 48 | 20 | 49 |
| 96.76861 | 33.10139 | yushu  | Line-leaf turmeric                     | 40 | 21 | 49 |
| 95.36717 | 32.5865  | zaduo  | Line-leaf turmeric                     | 30 | 20 | 49 |
| 101.5082 | 33.30869 | jiuzhi | Line-leaf turmeric                     | 39 | 20 | 49 |
| 101.3001 | 34.62144 | henan  | Line-leaf turmeric                     | 43 | 22 | 45 |
| 100.9497 | 33.36225 | jiuzhi | Line-leaf turmeric                     | 48 | 20 | 49 |
| 101.3849 | 34.30553 | henan  | Line-leaf turmeric                     | 19 | 22 | 28 |
| 101.3833 | 34.3     | henan  | Line-leaf turmeric                     | 27 | 22 | 32 |
| 101.1488 | 34.48019 | henan  | Line-leaf turmeric                     | 26 | 20 | 40 |
| 101.3001 | 34.62144 | henan  | Line-leaf turmeric                     | 43 | 22 | 45 |
| 95.36717 | 32.5865  | zaduo  | Line-leaf turmeric                     | 30 | 20 | 49 |
| 101.5082 | 33.30869 | jiuzhi | Line-leaf turmeric                     | 39 | 20 | 49 |
| 100.9497 | 33.36225 | jiuzhi | Line-leaf turmeric                     | 48 | 20 | 49 |
| 96.76861 | 33.10139 | yushu  | Line-leaf turmeric                     | 40 | 21 | 49 |
| 95.36717 | 32.5865  | zaduo  | Line-leaf turmeric                     | 30 | 20 | 49 |
| 101.3849 | 34.30553 | henan  | Line-leaf turmeric                     | 19 | 22 | 28 |
| 101.1488 | 34.48019 | henan  | Line-leaf turmeric                     | 26 | 20 | 40 |
| 101.3833 | 34.3     | henan  | Line-leaf turmeric                     | 27 | 22 | 32 |
| 101.3001 | 34.62144 | henan  | Line-leaf turmeric                     | 43 | 22 | 45 |
| 101.5971 | 34.69983 | henan  | Line-leaf turmeric                     | 18 | 21 | 30 |
| 101.5961 | 34.70056 | henan  | Line-leaf turmeric                     | 18 | 21 | 30 |
| 101.5082 | 33.30869 | jiuzhi | Line-leaf turmeric                     | 39 | 20 | 49 |
| 96.76861 | 33.10139 | yushu  | Line-leaf turmeric                     | 40 | 21 | 49 |
| 100.9497 | 33.36225 | jiuzhi | Line-leaf turmeric                     | 48 | 20 | 49 |
| 95.36717 | 32.5865  | zaduo  | Line-leaf turmeric                     | 30 | 20 | 49 |
| 101.0608 | 33.56458 | jiuzhi | Corydalis serrata, Polygonum bulbifera | 34 | 20 | 41 |
| 95.44703 | 32.84797 | zaduo  | Corydalis serrata, Polygonum bulbifera | 38 | 23 | 48 |

|          |          |        |                                        |    |    |    |
|----------|----------|--------|----------------------------------------|----|----|----|
| 100.558  | 32.68258 | banma  | Corydalis serrata, Polygonum bulbifera | 36 | 17 | 45 |
| 101.061  | 33.55711 | jiuzhi | Corydalis serrata, Polygonum bulbifera | 35 | 21 | 45 |
| 101.061  | 33.55711 | jiuzhi | Corydalis serrata, Polygonum bulbifera | 33 | 19 | 42 |
| 101.061  | 33.55711 | jiuzhi | Corydalis serrata, Polygonum bulbifera | 33 | 19 | 42 |
| 100.558  | 32.68258 | banma  | Corydalis serrata, Polygonum bulbifera | 36 | 17 | 45 |
| 101.061  | 33.55711 | jiuzhi | Corydalis serrata, Polygonum bulbifera | 33 | 19 | 39 |
| 100.558  | 32.68258 | banma  | Corydalis serrata, Polygonum bulbifera | 36 | 17 | 38 |
| 101.061  | 33.55711 | jiuzhi | Corydalis serrata, Polygonum bulbifera | 33 | 19 | 42 |
| 100.558  | 32.68258 | banma  | Corydalis serrata, Polygonum bulbifera | 36 | 17 | 45 |
| 101.061  | 33.55711 | jiuzhi | Corydalis serrata, Polygonum bulbifera | 33 | 19 | 42 |
| 100.558  | 32.68258 | banma  | Corydalis serrata, Polygonum bulbifera | 36 | 17 | 45 |
| 101.061  | 33.55711 | jiuzhi | Corydalis serrata, Polygonum bulbifera | 33 | 19 | 42 |
| 100.558  | 32.68258 | banma  | Corydalis serrata, Polygonum bulbifera | 36 | 17 | 45 |
| 100.558  | 32.68258 | banma  | Corydalis serrata, Polygonum bulbifera | 36 | 17 | 45 |
| 100.558  | 32.68258 | banma  | Corydalis serrata, Polygonum bulbifera | 36 | 17 | 45 |
| 101.061  | 33.55711 | jiuzhi | Corydalis serrata, Polygonum bulbifera | 33 | 19 | 42 |
| 100.558  | 32.68258 | banma  | Corydalis serrata, Polygonum bulbifera | 36 | 17 | 45 |
| 100.558  | 32.68258 | banma  | Corydalis serrata, Polygonum bulbifera | 36 | 17 | 45 |
| 99.59203 | 33.89006 | gande  | Line-leaf turmeric, bluegrass          | 45 | 20 | 46 |
| 99.59281 | 33.89006 | gande  | Line-leaf turmeric, bluegrass          | 45 | 20 | 46 |
| 99.60469 | 33.76217 | gande  | Line-leaf turmeric, bluegrass          | 18 | 19 | 35 |
| 99.81692 | 33.80586 | gande  | Line-leaf turmeric, bluegrass          | 44 | 20 | 48 |
| 99.60469 | 33.76217 | gande  | Line-leaf turmeric, bluegrass          | 18 | 19 | 35 |
| 99.81692 | 33.80586 | gande  | Line-leaf turmeric, bluegrass          | 44 | 20 | 32 |
| 99.59203 | 33.89006 | gande  | Line-leaf turmeric, bluegrass          | 45 | 20 | 33 |
| 99.60469 | 33.76217 | gande  | Line-leaf turmeric, bluegrass          | 18 | 19 | 46 |
| 99.81692 | 33.80586 | gande  | Line-leaf turmeric, bluegrass          | 21 | 17 | 43 |
| 99.81692 | 33.80586 | gande  | Line-leaf turmeric, bluegrass          | 44 | 20 | 48 |
| 99.59    | 33.89261 | gande  | Line-leaf turmeric, bluegrass          | 46 | 20 | 47 |
| 99.59203 | 33.89006 | gande  | Line-leaf turmeric, bluegrass          | 45 | 20 | 46 |
| 99.81692 | 33.80586 | gande  | Line-leaf turmeric, bluegrass          | 44 | 20 | 48 |
| 99.59    | 33.89261 | gande  | Line-leaf turmeric, bluegrass          | 46 | 20 | 47 |
| 99.59203 | 33.89006 | gande  | Line-leaf turmeric, bluegrass          | 45 | 20 | 46 |
| 99.60469 | 33.76217 | gande  | Line-leaf turmeric, bluegrass          | 18 | 19 | 35 |
| 99.59203 | 33.89006 | gande  | Line-leaf turmeric, bluegrass          | 45 | 20 | 46 |
| 99.81692 | 33.80586 | gande  | Line-leaf turmeric, bluegrass          | 44 | 20 | 48 |
| 99.59    | 33.89261 | gande  | Line-leaf turmeric, bluegrass          | 46 | 20 | 47 |
| 99.59    | 33.89261 | gande  | Line-leaf turmeric, bluegrass          | 46 | 20 | 47 |
| 99.59203 | 33.89006 | gande  | Line-leaf turmeric, bluegrass          | 45 | 20 | 46 |
| 99.81692 | 33.80586 | gande  | Line-leaf turmeric, bluegrass          | 44 | 20 | 48 |
| 99.59203 | 33.89006 | gande  | Line-leaf turmeric, bluegrass          | 45 | 20 | 46 |
| 99.81692 | 33.80586 | gande  | Line-leaf turmeric, bluegrass          | 44 | 20 | 48 |
| 99.59    | 33.89261 | gande  | Line-leaf turmeric, bluegrass          | 46 | 20 | 47 |
| 99.60469 | 33.76217 | gande  | Line-leaf turmeric, bluegrass          | 18 | 19 | 35 |

|          |          |          |                               |    |    |    |
|----------|----------|----------|-------------------------------|----|----|----|
| 99.81692 | 33.80586 | gande    | Line-leaf turmeric, bluegrass | 44 | 20 | 48 |
| 99.59    | 33.89261 | gande    | Line-leaf turmeric, bluegrass | 46 | 20 | 47 |
| 99.59203 | 33.89006 | gande    | Line-leaf turmeric, bluegrass | 45 | 20 | 46 |
| 99.60469 | 33.76217 | gande    | Line-leaf turmeric, bluegrass | 18 | 19 | 35 |
| 101.9282 | 35.78537 | jianzha  | Line-leaf turmeric, bluegrass | 29 | 20 | 41 |
| 99.81692 | 33.80586 | gande    | Line-leaf turmeric, bluegrass | 44 | 20 | 48 |
| 99.59    | 33.89261 | gande    | Line-leaf turmeric, bluegrass | 46 | 20 | 47 |
| 99.61125 | 33.76242 | gande    | Line-leaf turmeric, bluegrass | 17 | 19 | 36 |
| 99.60469 | 33.76217 | gande    | Line-leaf turmeric, bluegrass | 18 | 19 | 35 |
| 96.49467 | 32.07769 | nangqian | Lineleaf, weeds               | 20 | 21 | 41 |
| 96.49467 | 32.07769 | nangqian | Lineleaf, weeds               | 36 | 19 | 29 |
| 100.8303 | 34.87847 | tongde   | Lineleaf, weeds               | 43 | 21 | 49 |
| 96.49467 | 32.07769 | nangqian | Lineleaf, weeds               | 20 | 21 | 41 |
| 100.7331 | 34.64192 | maqin    | Lineleaf, weeds               | 37 | 20 | 47 |
| 100.7331 | 34.64192 | maqin    | Lineleaf, weeds               | 37 | 20 | 47 |
| 96.49467 | 32.07769 | nangqian | Lineleaf, weeds               | 20 | 21 | 41 |
| 100.7331 | 34.64192 | maqin    | Lineleaf, weeds               | 37 | 20 | 33 |
| 100.8254 | 34.87339 | tongde   | Lineleaf, weeds               | 41 | 21 | 32 |
| 100.7441 | 34.97256 | tongde   | Lineleaf, weeds               | 35 | 21 | 34 |
| 100.8466 | 34.96017 | tongde   | Lineleaf, weeds               | 35 | 19 | 29 |
| 96.49467 | 32.07769 | nangqian | Lineleaf, weeds               | 20 | 21 | 38 |
| 100.8466 | 34.96017 | tongde   | Lineleaf, weeds               | 35 | 19 | 53 |
| 96.49467 | 32.07769 | nangqian | Lineleaf, weeds               | 20 | 21 | 41 |
| 100.8254 | 34.87339 | tongde   | Lineleaf, weeds               | 41 | 21 | 47 |
| 100.7441 | 34.97256 | tongde   | Lineleaf, weeds               | 35 | 21 | 45 |
| 100.7331 | 34.64192 | maqin    | Lineleaf, weeds               | 37 | 20 | 47 |
| 100.8254 | 34.87339 | tongde   | Lineleaf, weeds               | 41 | 21 | 47 |
| 100.8466 | 34.96017 | tongde   | Lineleaf, weeds               | 35 | 19 | 53 |
| 96.49467 | 32.07769 | nangqian | Lineleaf, weeds               | 20 | 21 | 41 |
| 100.7441 | 34.97256 | tongde   | Lineleaf, weeds               | 35 | 21 | 45 |
| 100.7331 | 34.64192 | maqin    | Lineleaf, weeds               | 37 | 20 | 47 |
| 100.8466 | 34.96017 | tongde   | Lineleaf, weeds               | 35 | 19 | 53 |
| 96.49467 | 32.07769 | nangqian | Lineleaf, weeds               | 20 | 21 | 41 |
| 100.7331 | 34.64192 | maqin    | Lineleaf, weeds               | 37 | 20 | 47 |
| 100.8254 | 34.87339 | tongde   | Lineleaf, weeds               | 41 | 21 | 47 |
| 100.7331 | 34.64192 | maqin    | Lineleaf, weeds               | 37 | 20 | 47 |
| 100.8254 | 34.87339 | tongde   | Lineleaf, weeds               | 41 | 21 | 47 |
| 100.7441 | 34.97256 | tongde   | Lineleaf, weeds               | 35 | 21 | 45 |
| 96.49467 | 32.07769 | nangqian | Lineleaf, weeds               | 20 | 21 | 41 |
| 100.7441 | 34.97256 | tongde   | Lineleaf, weeds               | 35 | 21 | 45 |
| 100.8466 | 34.96017 | tongde   | Lineleaf, weeds               | 35 | 19 | 53 |
| 96.49467 | 32.07769 | nangqian | Lineleaf, weeds               | 20 | 21 | 41 |
| 100.8254 | 34.87339 | tongde   | Lineleaf, weeds               | 41 | 21 | 47 |
| 100.7331 | 34.64192 | maqin    | Lineleaf, weeds               | 37 | 20 | 47 |



|          |          |          |                                         |    |    |    |
|----------|----------|----------|-----------------------------------------|----|----|----|
| 100.8466 | 34.96017 | tongde   | Lineleaf, weeds                         | 35 | 19 | 53 |
| 96.49467 | 32.07769 | nangqian | Lineleaf, weeds                         | 20 | 21 | 41 |
| 100.7331 | 34.64192 | maqin    | Lineleaf, weeds                         | 18 | 15 | 46 |
| 101.8558 | 34.59461 | henan    | Lineleaf, weeds                         | 26 | 18 | 44 |
| 100.7331 | 34.64192 | maqin    | Lineleaf, weeds                         | 37 | 20 | 47 |
| 100.8254 | 34.87339 | tongde   | Lineleaf, weeds                         | 41 | 21 | 47 |
| 100.7441 | 34.97256 | tongde   | Lineleaf, weeds                         | 35 | 21 | 45 |
| 100.8466 | 34.96017 | tongde   | Lineleaf, weeds                         | 35 | 19 | 53 |
| 96.49467 | 32.07769 | nangqian | Lineleaf, weeds                         | 20 | 21 | 41 |
| 101.0758 | 36.22056 | guide    | Northwest Stipa type, Stipa brevis type | 16 | 21 | 47 |
| 100.7885 | 35.28444 | tongde   | Northwest stipa, lichen type            | 18 | 17 | 42 |
| 100.5754 | 35.18953 | tongde   | Northwest stipa, lichen type            | 20 | 21 | 44 |
| 100.5354 | 35.30361 | tongde   | Northwest stipa, lichen type            | 21 | 17 | 43 |
| 100.5232 | 35.22511 | tongde   | Northwest stipa, lichen type            | 18 | 20 | 48 |
| 100.4558 | 35.18947 | tongde   | Northwest stipa, lichen type            | 18 | 20 | 46 |
| 100.7885 | 35.28444 | tongde   | Northwest stipa, lichen type            | 18 | 17 | 42 |
| 100.4558 | 35.18947 | tongde   | Northwest stipa, lichen type            | 18 | 20 | 46 |
| 100.5754 | 35.18953 | tongde   | Northwest stipa, lichen type            | 20 | 21 | 44 |
| 100.5354 | 35.30361 | tongde   | Northwest stipa, lichen type            | 21 | 17 | 43 |
| 100.5232 | 35.22511 | tongde   | Northwest stipa, lichen type            | 18 | 20 | 48 |
| 100.4558 | 35.18947 | tongde   | Northwest stipa, lichen type            | 30 | 19 | 52 |
| 100.7885 | 35.28444 | tongde   | Northwest stipa, lichen type            | 18 | 17 | 42 |
| 100.5232 | 35.22511 | tongde   | Northwest stipa, lichen type            | 18 | 20 | 48 |
| 100.4558 | 35.18947 | tongde   | Northwest stipa, lichen type            | 18 | 20 | 46 |
| 100.5754 | 35.18953 | tongde   | Northwest stipa, lichen type            | 20 | 21 | 44 |
| 100.5195 | 35.30347 | tongde   | Northwest stipa, lichen type            | 20 | 18 | 41 |
| 100.5754 | 35.18953 | tongde   | Northwest stipa, lichen type            | 25 | 21 | 39 |
| 100.5232 | 35.22511 | tongde   | Northwest stipa, lichen type            | 18 | 20 | 31 |
| 100.4604 | 35.19172 | tongde   | Northwest stipa, lichen type            | 18 | 20 | 34 |
| 100.5814 | 35.19306 | tongde   | Northwest stipa, lichen type            | 20 | 20 | 35 |
| 100.5195 | 35.30347 | tongde   | Northwest stipa, lichen type            | 20 | 18 | 41 |
| 100.4901 | 35.31389 | tongde   | Northwest stipa, lichen type            | 19 | 21 | 31 |
| 100.7875 | 35.29378 | tongde   | Northwest stipa, lichen type            | 16 | 18 | 38 |
| 100.7875 | 35.29378 | tongde   | Northwest stipa, lichen type            | 16 | 18 | 44 |
| 100.5195 | 35.30347 | tongde   | Northwest stipa, lichen type            | 20 | 18 | 41 |
| 100.4901 | 35.31389 | tongde   | Northwest stipa, lichen type            | 19 | 21 | 49 |
| 100.5232 | 35.22511 | tongde   | Northwest stipa, lichen type            | 18 | 20 | 48 |
| 100.4604 | 35.19172 | tongde   | Northwest stipa, lichen type            | 18 | 20 | 46 |
| 100.5814 | 35.19306 | tongde   | Northwest stipa, lichen type            | 20 | 20 | 45 |
| 100.7875 | 35.29378 | tongde   | Northwest stipa, lichen type            | 16 | 18 | 44 |
| 100.4604 | 35.19172 | tongde   | Northwest stipa, lichen type            | 18 | 20 | 46 |
| 100.5814 | 35.19306 | tongde   | Northwest stipa, lichen type            | 20 | 20 | 45 |
| 100.4901 | 35.31389 | tongde   | Northwest stipa, lichen type            | 19 | 21 | 49 |
| 100.5232 | 35.22511 | tongde   | Northwest stipa, lichen type            | 18 | 20 | 48 |

[illegible]

|          |          |         |                                                     |    |    |    |
|----------|----------|---------|-----------------------------------------------------|----|----|----|
| 100.3918 | 35.21342 | tongde  | Northwest Stipa, Qinghai sand-fixing grass type     | 23 | 19 | 41 |
| 100.3918 | 35.21342 | tongde  | Northwest Stipa, Qinghai sand-fixing grass type     | 24 | 17 | 46 |
| 100.3918 | 35.21342 | tongde  | Northwest Stipa, Qinghai sand-fixing grass type     | 37 | 16 | 60 |
| 100.034  | 36.63711 | gonghe  | Northwest stipa, dwarf grass type                   | 34 | 18 | 54 |
| 101.4625 | 35.85847 | guide   | Qinghai sand-fixing grass and northwest stipa       | 20 | 19 | 42 |
| 100.7945 | 32.78942 | banma   | Moss grass and sage grass type with Xianbei flowers | 20 | 22 | 48 |
| 100.7945 | 32.78942 | banma   | Moss grass and sage grass type with Xianbei flowers | 20 | 22 | 48 |
| 100.7945 | 32.78942 | banma   | Moss grass and sage grass type with Xianbei flowers | 20 | 22 | 48 |
| 100.7945 | 32.78942 | banma   | Moss grass and sage grass type with Xianbei flowers | 20 | 22 | 30 |
| 100.7945 | 32.78942 | banma   | Moss grass and sage grass type with Xianbei flowers | 20 | 22 | 48 |
| 100.7945 | 32.78942 | banma   | Moss grass and sage grass type with Xianbei flowers | 20 | 22 | 48 |
| 100.7945 | 32.78942 | banma   | Moss grass and sage grass type with Xianbei flowers | 20 | 22 | 48 |
| 100.7945 | 32.78942 | banma   | Moss grass and sage grass type with Xianbei flowers | 20 | 22 | 48 |
| 100.7945 | 32.78942 | banma   | Moss grass and sage grass type with Xianbei flowers | 20 | 22 | 48 |
| 100.7945 | 32.78942 | banma   | Moss grass and sage grass type with Xianbei flowers | 20 | 22 | 48 |
| 100.7945 | 32.78942 | banma   | Moss grass and sage grass type with Xianbei flowers | 20 | 22 | 48 |
| 100.7945 | 32.78942 | banma   | Moss grass and sage grass type with Xianbei flowers | 20 | 22 | 48 |
| 102.2353 | 35.41893 | tongren | Polygonum bulbifera type with golden dew plum       | 22 | 23 | 41 |
| 101.2356 | 33.38028 | jiuzhi  | Polygonum bulbifera type with golden dew plum       | 25 | 12 | 49 |
| 101.4228 | 34.675   | henan   | Sorrel and moss type with golden dew plum           | 18 | 23 | 28 |
| 101.1235 | 34.45589 | henan   | Sorrel and moss type with golden dew plum           | 42 | 22 | 45 |
| 101.4228 | 34.675   | henan   | Sorrel and moss type with golden dew plum           | 18 | 23 | 28 |
| 101.4228 | 34.675   | henan   | Sorrel and moss type with golden dew plum           | 18 | 23 | 28 |
| 101.4232 | 34.68514 | henan   | Sorrel and moss type with golden dew plum           | 19 | 21 | 49 |
| 101.1235 | 34.45589 | henan   | Sorrel and moss type with golden dew plum           | 42 | 22 | 33 |
| 101.1235 | 34.45589 | henan   | Sorrel and moss type with golden dew plum           | 42 | 22 | 45 |
| 101.4232 | 34.68514 | henan   | Sorrel and moss type with golden dew plum           | 19 | 21 | 30 |
| 101.4232 | 34.68514 | henan   | Sorrel and moss type with golden dew plum           | 19 | 21 | 30 |
| 101.4232 | 34.68514 | henan   | Sorrel and moss type with golden dew plum           | 19 | 21 | 30 |
| 101.1235 | 34.45589 | henan   | Sorrel and moss type with golden dew plum           | 42 | 22 | 45 |
| 101.1235 | 34.45589 | henan   | Sorrel and moss type with golden dew plum           | 42 | 22 | 45 |
| 101.4232 | 34.68514 | henan   | Sorrel and moss type with golden dew plum           | 19 | 21 | 30 |
| 101.4232 | 34.68514 | henan   | Sorrel and moss type with golden dew plum           | 19 | 21 | 30 |
| 101.1235 | 34.45589 | henan   | Sorrel and moss type with golden dew plum           | 42 | 22 | 45 |
| 101.4232 | 34.68514 | henan   | Sorrel and moss type with golden dew plum           | 19 | 21 | 30 |
| 101.1235 | 34.45589 | henan   | Sorrel and moss type with golden dew plum           | 42 | 22 | 45 |
| 100.3222 | 34.37394 | maqin   | Sorrel and moss type with golden dew plum           | 26 | 17 | 41 |
| 100.6887 | 32.92472 | banma   | Moss grass, sage grass type with alpine willow      | 24 | 17 | 42 |
| 100.6887 | 32.92472 | banma   | Moss grass, sage grass type with alpine willow      | 24 | 17 | 42 |
| 99.81692 | 33.80586 | gande   | Moss grass, sage grass type with alpine willow      | 44 | 20 | 48 |
| 100.6887 | 32.92472 | banma   | Moss grass, sage grass type with alpine willow      | 24 | 17 | 42 |
| 100.6887 | 32.92472 | banma   | Moss grass, sage grass type with alpine willow      | 24 | 17 | 42 |
| 100.6887 | 32.92472 | banma   | Moss grass, sage grass type with alpine willow      | 24 | 17 | 41 |
| 100.6887 | 32.92472 | banma   | Moss grass, sage grass type with alpine willow      | 24 | 17 | 42 |
| 100.6887 | 32.92472 | banma   | Moss grass, sage grass type with alpine willow      | 24 | 17 | 42 |

|          |          |        |                                                       |    |    |    |
|----------|----------|--------|-------------------------------------------------------|----|----|----|
| 100.6887 | 32.92472 | banma  | Moss grass, sage grass type with alpine willow        | 24 | 17 | 42 |
| 100.6887 | 32.92472 | banma  | Moss grass, sage grass type with alpine willow        | 24 | 17 | 42 |
| 100.6887 | 32.92472 | banma  | Moss grass, sage grass type with alpine willow        | 24 | 17 | 42 |
| 100.6887 | 32.92472 | banma  | Moss grass, sage grass type with alpine willow        | 24 | 17 | 42 |
| 100.6486 | 35.5105  | guinan | Achnatherum splendens, Qinghai sand-fixing grass type | 25 | 21 | 37 |
| 100.7299 | 32.90175 | banma  | Wo Ye Song grass type                                 | 24 | 17 | 42 |
| 100.8609 | 33.28719 | jiuzhi | Wo Ye Song grass type                                 | 39 | 21 | 47 |
| 101.1386 | 33.44225 | jiuzhi | Wo Ye Song grass type                                 | 23 | 17 | 42 |
| 100.5076 | 33.34017 | jiuzhi | Wo Ye Song grass type                                 | 25 | 15 | 42 |
| 100.0631 | 33.00636 | banma  | Wo Ye Song grass type                                 | 45 | 19 | 48 |
| 101.0583 | 32.99406 | banma  | Wo Ye Song grass type                                 | 49 | 14 | 59 |
| 100.0971 | 32.98867 | banma  | Wo Ye Song grass type                                 | 37 | 20 | 49 |
| 100.8558 | 32.81256 | banma  | Wo Ye Song grass type                                 | 27 | 20 | 42 |
| 101.4288 | 33.40981 | jiuzhi | Wo Ye Song grass type                                 | 44 | 19 | 52 |
| 101.5082 | 33.30869 | jiuzhi | Wo Ye Song grass type                                 | 39 | 20 | 49 |
| 100.9889 | 33.44444 | jiuzhi | Wo Ye Song grass type                                 | 48 | 20 | 50 |
| 100.7299 | 32.90175 | banma  | Wo Ye Song grass type                                 | 24 | 17 | 42 |
| 100.0631 | 33.00636 | banma  | Wo Ye Song grass type                                 | 45 | 19 | 48 |
| 100.0582 | 32.99597 | banma  | Wo Ye Song grass type                                 | 44 | 21 | 47 |
| 100.5076 | 33.34017 | jiuzhi | Wo Ye Song grass type                                 | 25 | 15 | 42 |
| 100.8609 | 33.28719 | jiuzhi | Wo Ye Song grass type                                 | 39 | 21 | 47 |
| 101.1386 | 33.44225 | jiuzhi | Wo Ye Song grass type                                 | 23 | 17 | 42 |
| 100.9758 | 33.43164 | jiuzhi | Wo Ye Song grass type                                 | 53 | 21 | 47 |
| 100.0631 | 33.00636 | banma  | Wo Ye Song grass type                                 | 45 | 19 | 48 |
| 100.8671 | 32.82583 | banma  | Wo Ye Song grass type                                 | 23 | 21 | 46 |
| 101.4288 | 33.40981 | jiuzhi | Wo Ye Song grass type                                 | 44 | 19 | 52 |
| 100.9889 | 33.44444 | jiuzhi | Wo Ye Song grass type                                 | 48 | 20 | 50 |
| 101.6023 | 33.29964 | jiuzhi | Wo Ye Song grass type                                 | 36 | 22 | 47 |
| 101.0601 | 32.99475 | banma  | Wo Ye Song grass type                                 | 53 | 14 | 59 |
| 100.0971 | 32.98867 | banma  | Wo Ye Song grass type                                 | 37 | 20 | 49 |
| 100.7299 | 32.90175 | banma  | Wo Ye Song grass type                                 | 24 | 17 | 42 |
| 100.0631 | 33.00636 | banma  | Wo Ye Song grass type                                 | 45 | 19 | 48 |
| 101.0582 | 32.99597 | banma  | Wo Ye Song grass type                                 | 49 | 14 | 59 |
| 101.4288 | 33.40981 | jiuzhi | Wo Ye Song grass type                                 | 44 | 19 | 52 |
| 100.9758 | 33.43164 | jiuzhi | Wo Ye Song grass type                                 | 53 | 21 | 47 |
| 100.0631 | 33.00636 | banma  | Wo Ye Song grass type                                 | 45 | 19 | 48 |
| 101.0601 | 32.99475 | banma  | Wo Ye Song grass type                                 | 53 | 14 | 59 |
| 100.8671 | 32.82583 | banma  | Wo Ye Song grass type                                 | 23 | 21 | 46 |
| 100.0631 | 33.00636 | banma  | Wo Ye Song grass type                                 | 45 | 19 | 48 |
| 100.0971 | 32.98867 | banma  | Wo Ye Song grass type                                 | 40 | 21 | 49 |
| 100.5076 | 33.34017 | jiuzhi | Wo Ye Song grass type                                 | 25 | 15 | 42 |
| 100.8609 | 33.28719 | jiuzhi | Wo Ye Song grass type                                 | 39 | 21 | 47 |
| 101.1386 | 33.44225 | jiuzhi | Wo Ye Song grass type                                 | 23 | 17 | 42 |

|          |          |        |                       |    |    |    |
|----------|----------|--------|-----------------------|----|----|----|
| 100.9889 | 33.44444 | jiuzhi | Wo Ye Song grass type | 48 | 20 | 50 |
| 101.6023 | 33.29964 | jiuzhi | Wo Ye Song grass type | 36 | 22 | 47 |
| 100.0971 | 32.98867 | banma  | Wo Ye Song grass type | 37 | 20 | 49 |
| 100.8609 | 33.28719 | jiuzhi | Wo Ye Song grass type | 43 | 22 | 45 |
| 100.7299 | 32.90175 | banma  | Wo Ye Song grass type | 24 | 17 | 42 |
| 100.0631 | 33.00636 | banma  | Wo Ye Song grass type | 45 | 19 | 48 |
| 100.0625 | 33.00883 | banma  | Wo Ye Song grass type | 45 | 19 | 32 |
| 101.4288 | 33.40981 | jiuzhi | Wo Ye Song grass type | 44 | 19 | 29 |
| 100.5076 | 33.34017 | jiuzhi | Wo Ye Song grass type | 25 | 15 | 42 |
| 100.8609 | 33.28719 | jiuzhi | Wo Ye Song grass type | 39 | 21 | 31 |
| 101.1386 | 33.44225 | jiuzhi | Wo Ye Song grass type | 23 | 17 | 41 |
| 100.9758 | 33.43164 | jiuzhi | Wo Ye Song grass type | 53 | 21 | 33 |
| 101.6023 | 33.29964 | jiuzhi | Wo Ye Song grass type | 36 | 22 | 31 |
| 101.0601 | 32.99475 | banma  | Wo Ye Song grass type | 53 | 14 | 27 |
| 100.0971 | 32.98867 | banma  | Wo Ye Song grass type | 37 | 20 | 31 |
| 100.7299 | 32.90175 | banma  | Wo Ye Song grass type | 24 | 17 | 41 |
| 101.0582 | 32.99597 | banma  | Wo Ye Song grass type | 49 | 14 | 27 |
| 100.9889 | 33.44444 | jiuzhi | Wo Ye Song grass type | 48 | 20 | 31 |
| 100.0631 | 33.00636 | banma  | Wo Ye Song grass type | 45 | 19 | 32 |
| 100.8671 | 32.82583 | banma  | Wo Ye Song grass type | 23 | 21 | 34 |
| 100.7299 | 32.90175 | banma  | Wo Ye Song grass type | 37 | 20 | 47 |
| 100.7299 | 32.90175 | banma  | Wo Ye Song grass type | 24 | 17 | 42 |
| 100.0625 | 33.00883 | banma  | Wo Ye Song grass type | 45 | 19 | 48 |
| 101.0582 | 32.99597 | banma  | Wo Ye Song grass type | 49 | 14 | 59 |
| 100.8606 | 33.28694 | jiuzhi | Wo Ye Song grass type | 38 | 21 | 46 |
| 101.1386 | 33.44225 | jiuzhi | Wo Ye Song grass type | 23 | 17 | 42 |
| 100.9889 | 33.44444 | jiuzhi | Wo Ye Song grass type | 48 | 20 | 50 |
| 101.6023 | 33.29964 | jiuzhi | Wo Ye Song grass type | 36 | 22 | 47 |
| 100.0631 | 33.00636 | banma  | Wo Ye Song grass type | 45 | 19 | 48 |
| 101.0601 | 32.99475 | banma  | Wo Ye Song grass type | 53 | 14 | 59 |
| 100.0971 | 32.98867 | banma  | Wo Ye Song grass type | 37 | 20 | 49 |
| 100.8671 | 32.82583 | banma  | Wo Ye Song grass type | 23 | 21 | 46 |
| 101.4288 | 33.40981 | jiuzhi | Wo Ye Song grass type | 44 | 19 | 52 |
| 100.9758 | 33.43164 | jiuzhi | Wo Ye Song grass type | 53 | 21 | 47 |
| 100.0625 | 33.00883 | banma  | Wo Ye Song grass type | 45 | 19 | 48 |
| 101.4288 | 33.40981 | jiuzhi | Wo Ye Song grass type | 44 | 19 | 52 |
| 100.5076 | 33.34017 | jiuzhi | Wo Ye Song grass type | 25 | 15 | 42 |
| 100.9889 | 33.44444 | jiuzhi | Wo Ye Song grass type | 48 | 20 | 50 |
| 101.6023 | 33.29964 | jiuzhi | Wo Ye Song grass type | 36 | 22 | 47 |
| 101.0601 | 32.99475 | banma  | Wo Ye Song grass type | 53 | 14 | 59 |
| 100.8671 | 32.82583 | banma  | Wo Ye Song grass type | 23 | 21 | 46 |
| 100.7299 | 32.90175 | banma  | Wo Ye Song grass type | 24 | 17 | 42 |
| 101.0582 | 32.99597 | banma  | Wo Ye Song grass type | 49 | 14 | 59 |
| 101.1386 | 33.44225 | jiuzhi | Wo Ye Song grass type | 23 | 17 | 42 |

|          |          |        |                       |    |    |    |
|----------|----------|--------|-----------------------|----|----|----|
| 100.9758 | 33.43164 | jiuzhi | Wo Ye Song grass type | 53 | 21 | 47 |
| 100.0631 | 33.00636 | banma  | Wo Ye Song grass type | 45 | 19 | 48 |
| 100.0971 | 32.98867 | banma  | Wo Ye Song grass type | 37 | 20 | 49 |
| 100.0971 | 32.98867 | banma  | Wo Ye Song grass type | 48 | 18 | 54 |
| 101.0582 | 32.99597 | banma  | Wo Ye Song grass type | 49 | 14 | 59 |
| 100.8609 | 33.28719 | jiuzhi | Wo Ye Song grass type | 39 | 21 | 47 |
| 101.1386 | 33.44225 | jiuzhi | Wo Ye Song grass type | 23 | 17 | 42 |
| 100.9889 | 33.44444 | jiuzhi | Wo Ye Song grass type | 48 | 20 | 50 |
| 101.6018 | 33.30031 | jiuzhi | Wo Ye Song grass type | 36 | 22 | 47 |
| 101.6023 | 33.29964 | jiuzhi | Wo Ye Song grass type | 36 | 22 | 47 |
| 100.9497 | 33.36225 | jiuzhi | Wo Ye Song grass type | 48 | 20 | 49 |
| 101.0601 | 32.99475 | banma  | Wo Ye Song grass type | 53 | 14 | 59 |
| 100.8671 | 32.82583 | banma  | Wo Ye Song grass type | 23 | 21 | 46 |
| 100.9497 | 33.36225 | jiuzhi | Wo Ye Song grass type | 27 | 17 | 46 |
| 100.8671 | 32.82583 | banma  | Wo Ye Song grass type | 44 | 20 | 47 |
| 101.4288 | 33.40981 | jiuzhi | Wo Ye Song grass type | 44 | 19 | 52 |
| 100.5076 | 33.34017 | jiuzhi | Wo Ye Song grass type | 25 | 15 | 42 |
| 100.9758 | 33.43164 | jiuzhi | Wo Ye Song grass type | 53 | 21 | 47 |
| 100.0971 | 32.98867 | banma  | Wo Ye Song grass type | 37 | 20 | 49 |
| 100.7299 | 32.90175 | banma  | Wo Ye Song grass type | 24 | 17 | 42 |
| 101.0582 | 32.99597 | banma  | Wo Ye Song grass type | 49 | 14 | 59 |
| 101.4288 | 33.40981 | jiuzhi | Wo Ye Song grass type | 44 | 19 | 52 |
| 100.5076 | 33.34017 | jiuzhi | Wo Ye Song grass type | 25 | 15 | 42 |
| 100.8606 | 33.28694 | jiuzhi | Wo Ye Song grass type | 38 | 21 | 46 |
| 101.1386 | 33.44225 | jiuzhi | Wo Ye Song grass type | 23 | 17 | 42 |
| 101.6018 | 33.30031 | jiuzhi | Wo Ye Song grass type | 36 | 22 | 47 |
| 101.6023 | 33.29964 | jiuzhi | Wo Ye Song grass type | 36 | 22 | 47 |
| 100.0971 | 32.98867 | banma  | Wo Ye Song grass type | 37 | 20 | 49 |
| 100.8671 | 32.82583 | banma  | Wo Ye Song grass type | 23 | 21 | 46 |
| 100.5076 | 33.34017 | jiuzhi | Wo Ye Song grass type | 25 | 15 | 42 |
| 100.8606 | 33.28694 | jiuzhi | Wo Ye Song grass type | 38 | 21 | 46 |
| 100.9889 | 33.44444 | jiuzhi | Wo Ye Song grass type | 48 | 20 | 50 |
| 100.9758 | 33.43164 | jiuzhi | Wo Ye Song grass type | 53 | 21 | 47 |
| 101.6018 | 33.30031 | jiuzhi | Wo Ye Song grass type | 36 | 22 | 47 |
| 101.6023 | 33.29964 | jiuzhi | Wo Ye Song grass type | 36 | 22 | 47 |
| 100.0625 | 33.00883 | banma  | Wo Ye Song grass type | 45 | 19 | 48 |
| 100.9889 | 33.44444 | jiuzhi | Wo Ye Song grass type | 48 | 20 | 50 |
| 100.9758 | 33.43164 | jiuzhi | Wo Ye Song grass type | 53 | 21 | 47 |
| 100.0631 | 33.00636 | banma  | Wo Ye Song grass type | 45 | 19 | 48 |
| 101.0601 | 32.99475 | banma  | Wo Ye Song grass type | 53 | 14 | 59 |
| 101.4288 | 33.40981 | jiuzhi | Wo Ye Song grass type | 44 | 19 | 52 |
| 101.1386 | 33.44225 | jiuzhi | Wo Ye Song grass type | 23 | 17 | 42 |
| 100.7299 | 32.90175 | banma  | Wo Ye Song grass type | 24 | 17 | 42 |
| 100.0625 | 33.00883 | banma  | Wo Ye Song grass type | 45 | 19 | 48 |

|          |          |         |                       |    |    |    |
|----------|----------|---------|-----------------------|----|----|----|
| 101.0582 | 32.99597 | banma   | Wo Ye Song grass type | 49 | 14 | 59 |
| 101.0601 | 32.99475 | banma   | Wo Ye Song grass type | 53 | 14 | 59 |
| 100.0971 | 32.98867 | banma   | Wo Ye Song grass type | 37 | 20 | 49 |
| 100.8671 | 32.82583 | banma   | Wo Ye Song grass type | 23 | 21 | 46 |
| 100.0631 | 33.00636 | banma   | Wo Ye Song grass type | 20 | 18 | 41 |
| 100.7299 | 32.90175 | banma   | Wo Ye Song grass type | 24 | 17 | 42 |
| 100.0625 | 33.00883 | banma   | Wo Ye Song grass type | 45 | 19 | 48 |
| 101.0582 | 32.99597 | banma   | Wo Ye Song grass type | 49 | 14 | 59 |
| 101.4288 | 33.40981 | jiuzhi  | Wo Ye Song grass type | 44 | 19 | 52 |
| 100.8606 | 33.28694 | jiuzhi  | Wo Ye Song grass type | 38 | 21 | 46 |
| 101.1386 | 33.44225 | jiuzhi  | Wo Ye Song grass type | 23 | 17 | 42 |
| 100.9889 | 33.44444 | jiuzhi  | Wo Ye Song grass type | 48 | 20 | 50 |
| 100.9758 | 33.43164 | jiuzhi  | Wo Ye Song grass type | 53 | 21 | 47 |
| 101.6023 | 33.29964 | jiuzhi  | Wo Ye Song grass type | 36 | 22 | 47 |
| 100.0631 | 33.00636 | banma   | Wo Ye Song grass type | 45 | 19 | 48 |
| 101.0601 | 32.99475 | banma   | Wo Ye Song grass type | 53 | 14 | 59 |
| 100.0971 | 32.98867 | banma   | Wo Ye Song grass type | 37 | 20 | 49 |
| 100.8671 | 32.82583 | banma   | Wo Ye Song grass type | 23 | 21 | 46 |
| 100.7299 | 32.90175 | banma   | Wo Ye Song grass type | 24 | 17 | 42 |
| 100.0625 | 33.00883 | banma   | Wo Ye Song grass type | 45 | 19 | 48 |
| 101.0582 | 32.99597 | banma   | Wo Ye Song grass type | 49 | 14 | 59 |
| 101.4288 | 33.40981 | jiuzhi  | Wo Ye Song grass type | 44 | 19 | 52 |
| 100.8606 | 33.28694 | jiuzhi  | Wo Ye Song grass type | 38 | 21 | 46 |
| 101.1386 | 33.44225 | jiuzhi  | Wo Ye Song grass type | 23 | 17 | 42 |
| 100.9889 | 33.44444 | jiuzhi  | Wo Ye Song grass type | 48 | 20 | 50 |
| 101.6018 | 33.30031 | jiuzhi  | Wo Ye Song grass type | 36 | 22 | 47 |
| 100.0631 | 33.00636 | banma   | Wo Ye Song grass type | 45 | 19 | 48 |
| 101.0601 | 32.99475 | banma   | Wo Ye Song grass type | 53 | 14 | 59 |
| 100.0971 | 32.98867 | banma   | Wo Ye Song grass type | 37 | 20 | 49 |
| 101.495  | 33.31908 | jiuzhi  | Wo Ye Song grass type | 39 | 20 | 50 |
| 100.8671 | 32.82583 | banma   | Wo Ye Song grass type | 23 | 21 | 46 |
| 101.6018 | 33.30014 | jiuzhi  | Wo Ye Song grass type | 36 | 22 | 47 |
| 101.6018 | 33.30031 | jiuzhi  | Wo Ye Song grass type | 36 | 22 | 47 |
| 101.6018 | 33.30031 | jiuzhi  | Wo Ye Song grass type | 36 | 22 | 47 |
| 101.6018 | 33.30031 | jiuzhi  | Wo Ye Song grass type | 36 | 22 | 31 |
| 101.6018 | 33.30031 | jiuzhi  | Wo Ye Song grass type | 36 | 22 | 47 |
| 101.6018 | 33.30031 | jiuzhi  | Wo Ye Song grass type | 36 | 22 | 47 |
| 101.3001 | 34.57553 | henan   | Alpine grass type     | 25 | 21 | 39 |
| 99.55403 | 35.76206 | xinghai | Alpine grass type     | 37 | 16 | 60 |
| 101.1529 | 35.30389 | zeku    | Alpine grass type     | 20 | 19 | 35 |
| 101.3773 | 34.30956 | henan   | Alpine grass type     | 18 | 23 | 29 |
| 101.4573 | 35.03775 | zeku    | Alpine grass type     | 18 | 17 | 40 |
| 99.71778 | 33.72694 | dari    | Alpine grass type     | 43 | 20 | 46 |
| 95.63583 | 32.93444 | zaduo   | Alpine grass type     | 20 | 19 | 50 |

|          |          |          |                   |    |    |    |
|----------|----------|----------|-------------------|----|----|----|
| 99.25672 | 33.62003 | dari     | Alpine grass type | 39 | 18 | 53 |
| 99.54053 | 33.37433 | dari     | Alpine grass type | 48 | 17 | 54 |
| 99.54    | 33.37406 | dari     | Alpine grass type | 45 | 17 | 54 |
| 99       | 33.68333 | dari     | Alpine grass type | 41 | 19 | 48 |
| 98.96917 | 33.68694 | dari     | Alpine grass type | 48 | 18 | 54 |
| 96.31361 | 32.25833 | nangqian | Alpine grass type | 33 | 23 | 43 |
| 99.82975 | 34.59606 | maqin    | Alpine grass type | 58 | 21 | 46 |
| 101.32   | 34.58303 | henan    | Alpine grass type | 24 | 21 | 38 |
| 101.1529 | 35.30389 | zeku     | Alpine grass type | 20 | 19 | 35 |
| 99.82975 | 34.59606 | maqin    | Alpine grass type | 58 | 21 | 46 |
| 101.7949 | 35.05811 | zeku     | Alpine grass type | 24 | 20 | 39 |
| 92.37719 | 34.112   | geermu   | Alpine grass type | 18 | 17 | 56 |
| 99.71778 | 33.72694 | dari     | Alpine grass type | 43 | 20 | 46 |
| 95.63556 | 32.93406 | zaduo    | Alpine grass type | 34 | 21 | 48 |
| 99.25672 | 33.62003 | dari     | Alpine grass type | 39 | 18 | 53 |
| 99.54053 | 33.37433 | dari     | Alpine grass type | 48 | 17 | 54 |
| 99.54    | 33.37406 | dari     | Alpine grass type | 45 | 17 | 54 |
| 99       | 33.68333 | dari     | Alpine grass type | 41 | 19 | 48 |
| 95.63556 | 32.93406 | zaduo    | Alpine grass type | 25 | 17 | 42 |
| 99.55403 | 35.76206 | xinghai  | Alpine grass type | 37 | 16 | 60 |
| 101.55   | 34.63333 | henan    | Alpine grass type | 20 | 24 | 25 |
| 97.09083 | 32.84389 | yushu    | Alpine grass type | 28 | 22 | 47 |
| 97.09206 | 32.91161 | yushu    | Alpine grass type | 20 | 21 | 40 |
| 96.31361 | 32.25842 | nangqian | Alpine grass type | 33 | 23 | 43 |
| 99.82975 | 34.59606 | maqin    | Alpine grass type | 33 | 20 | 48 |
| 99.55403 | 35.76206 | xinghai  | Alpine grass type | 37 | 16 | 60 |
| 101.6119 | 35.08781 | zeku     | Alpine grass type | 20 | 17 | 42 |
| 101.4573 | 35.03775 | zeku     | Alpine grass type | 18 | 17 | 40 |
| 95.63556 | 32.93406 | zaduo    | Alpine grass type | 34 | 21 | 48 |
| 99.25672 | 33.62003 | dari     | Alpine grass type | 39 | 18 | 53 |
| 99.54053 | 33.37433 | dari     | Alpine grass type | 48 | 17 | 54 |
| 99       | 33.68333 | dari     | Alpine grass type | 41 | 19 | 48 |
| 97.09206 | 32.91161 | yushu    | Alpine grass type | 20 | 21 | 40 |
| 96.31361 | 32.25842 | nangqian | Alpine grass type | 33 | 23 | 43 |
| 99.82975 | 34.59606 | maqin    | Alpine grass type | 58 | 21 | 46 |
| 92.37719 | 34.112   | geermu   | Alpine grass type | 18 | 17 | 56 |
| 97.09083 | 32.84389 | yushu    | Alpine grass type | 28 | 22 | 47 |
| 99.54    | 33.37406 | dari     | Alpine grass type | 45 | 17 | 54 |
| 101.6119 | 35.08781 | zeku     | Alpine grass type | 20 | 17 | 41 |
| 101.4573 | 35.03775 | zeku     | Alpine grass type | 18 | 17 | 42 |
| 101.8019 | 35.06211 | zeku     | Alpine grass type | 23 | 19 | 40 |
| 99.71778 | 33.72694 | dari     | Alpine grass type | 43 | 20 | 34 |
| 97.09083 | 32.84389 | yushu    | Alpine grass type | 28 | 22 | 31 |
| 99.54389 | 33.37861 | dari     | Alpine grass type | 49 | 17 | 29 |



|          |          |          |                   |    |    |    |
|----------|----------|----------|-------------------|----|----|----|
| 98.96917 | 33.68694 | dari     | Alpine grass type | 48 | 18 | 29 |
| 97.09206 | 32.91161 | yushu    | Alpine grass type | 20 | 21 | 39 |
| 96.31361 | 32.25842 | nangqian | Alpine grass type | 33 | 23 | 34 |
| 99.55403 | 35.76206 | xinghai  | Alpine grass type | 37 | 16 | 24 |
| 99.82975 | 34.59606 | maqin    | Alpine grass type | 58 | 21 | 33 |
| 92.37719 | 34.112   | geermu   | Alpine grass type | 18 | 17 | 27 |
| 100.222  | 33.41953 | dari     | Alpine grass type | 44 | 20 | 34 |
| 99.25672 | 33.62003 | dari     | Alpine grass type | 39 | 18 | 28 |
| 99.53522 | 33.36881 | dari     | Alpine grass type | 45 | 16 | 28 |
| 99       | 33.68333 | dari     | Alpine grass type | 41 | 19 | 32 |
| 99.82975 | 34.59606 | maqin    | Alpine grass type | 44 | 20 | 48 |
| 99.55403 | 35.76206 | xinghai  | Alpine grass type | 37 | 16 | 60 |
| 99.82975 | 34.59606 | maqin    | Alpine grass type | 58 | 21 | 46 |
| 101.6119 | 35.08781 | zeku     | Alpine grass type | 20 | 17 | 42 |
| 92.37719 | 34.112   | geermu   | Alpine grass type | 18 | 17 | 56 |
| 99.71778 | 33.72694 | dari     | Alpine grass type | 43 | 20 | 46 |
| 97.09083 | 32.84389 | yushu    | Alpine grass type | 28 | 22 | 47 |
| 99.25672 | 33.62003 | dari     | Alpine grass type | 39 | 18 | 53 |
| 99.53522 | 33.36881 | dari     | Alpine grass type | 45 | 16 | 56 |
| 99.82975 | 34.59606 | maqin    | Alpine grass type | 35 | 22 | 48 |
| 99       | 33.68333 | dari     | Alpine grass type | 41 | 19 | 48 |
| 97.09206 | 32.91161 | yushu    | Alpine grass type | 20 | 21 | 40 |
| 96.31361 | 32.25842 | nangqian | Alpine grass type | 33 | 23 | 43 |
| 99.82975 | 34.59606 | maqin    | Alpine grass type | 35 | 19 | 53 |
| 100.222  | 33.41953 | dari     | Alpine grass type | 44 | 20 | 47 |
| 95.63556 | 32.93406 | zaduo    | Alpine grass type | 34 | 21 | 48 |
| 99.54389 | 33.37861 | dari     | Alpine grass type | 49 | 17 | 54 |
| 98.96917 | 33.68694 | dari     | Alpine grass type | 48 | 18 | 54 |
| 95.63556 | 32.93406 | zaduo    | Alpine grass type | 18 | 20 | 32 |
| 99.55403 | 35.76206 | xinghai  | Alpine grass type | 37 | 16 | 60 |
| 101.6119 | 35.08781 | zeku     | Alpine grass type | 20 | 17 | 42 |
| 101.8019 | 35.06211 | zeku     | Alpine grass type | 23 | 19 | 41 |
| 99.25475 | 33.75425 | dari     | Alpine grass type | 18 | 17 | 56 |
| 99.71778 | 33.72694 | dari     | Alpine grass type | 43 | 20 | 46 |
| 97.09083 | 32.84389 | yushu    | Alpine grass type | 28 | 22 | 47 |
| 99.25672 | 33.62003 | dari     | Alpine grass type | 39 | 18 | 53 |
| 99.53522 | 33.36881 | dari     | Alpine grass type | 45 | 16 | 56 |
| 99.54389 | 33.37861 | dari     | Alpine grass type | 49 | 17 | 54 |
| 99.25475 | 33.75425 | dari     | Alpine grass type | 17 | 20 | 35 |
| 99       | 33.68333 | dari     | Alpine grass type | 41 | 19 | 48 |
| 97.09206 | 32.91161 | yushu    | Alpine grass type | 20 | 21 | 40 |
| 96.31361 | 32.25842 | nangqian | Alpine grass type | 33 | 23 | 43 |
| 101.4573 | 35.03775 | zeku     | Alpine grass type | 18 | 17 | 40 |
| 100.222  | 33.41953 | dari     | Alpine grass type | 44 | 20 | 47 |

|          |          |          |                   |    |    |    |
|----------|----------|----------|-------------------|----|----|----|
| 95.63556 | 32.93406 | zaduo    | Alpine grass type | 34 | 21 | 48 |
| 98.96917 | 33.68694 | dari     | Alpine grass type | 48 | 18 | 54 |
| 99.1305  | 33.68286 | dari     | Alpine grass type | 34 | 20 | 48 |
| 99.25672 | 33.62003 | dari     | Alpine grass type | 37 | 24 | 44 |
| 99.55403 | 35.76206 | xinghai  | Alpine grass type | 37 | 16 | 60 |
| 101.6119 | 35.08781 | zeku     | Alpine grass type | 20 | 17 | 42 |
| 101.4573 | 35.03775 | zeku     | Alpine grass type | 18 | 17 | 40 |
| 92.37719 | 34.112   | geermu   | Alpine grass type | 18 | 17 | 56 |
| 100.222  | 33.41953 | dari     | Alpine grass type | 44 | 20 | 47 |
| 97.09083 | 32.84389 | yushu    | Alpine grass type | 28 | 22 | 47 |
| 95.63556 | 32.93406 | zaduo    | Alpine grass type | 34 | 21 | 48 |
| 99.25672 | 33.62003 | dari     | Alpine grass type | 39 | 18 | 53 |
| 99.25475 | 33.75425 | dari     | Alpine grass type | 17 | 20 | 35 |
| 99       | 33.68333 | dari     | Alpine grass type | 41 | 19 | 48 |
| 97.09206 | 32.91161 | yushu    | Alpine grass type | 20 | 21 | 40 |
| 99.25672 | 33.62003 | dari     | Alpine grass type | 30 | 19 | 52 |
| 99.25672 | 33.62003 | dari     | Alpine grass type | 35 | 20 | 52 |
| 99.82975 | 34.59606 | maqin    | Alpine grass type | 58 | 21 | 46 |
| 99.71778 | 33.72694 | dari     | Alpine grass type | 43 | 20 | 46 |
| 99.53522 | 33.36881 | dari     | Alpine grass type | 45 | 16 | 56 |
| 98.96917 | 33.68694 | dari     | Alpine grass type | 48 | 18 | 54 |
| 99.1305  | 33.68286 | dari     | Alpine grass type | 34 | 20 | 48 |
| 100.0631 | 34.52242 | maqin    | Alpine grass type | 18 | 15 | 42 |
| 100.0631 | 34.52242 | maqin    | Alpine grass type | 35 | 22 | 46 |
| 99.82975 | 34.59606 | maqin    | Alpine grass type | 58 | 21 | 46 |
| 101.6119 | 35.08781 | zeku     | Alpine grass type | 20 | 17 | 42 |
| 101.4573 | 35.03775 | zeku     | Alpine grass type | 18 | 17 | 40 |
| 97.09083 | 32.84389 | yushu    | Alpine grass type | 28 | 22 | 47 |
| 95.63556 | 32.93406 | zaduo    | Alpine grass type | 34 | 21 | 48 |
| 99.25672 | 33.62003 | dari     | Alpine grass type | 39 | 18 | 53 |
| 99       | 33.68333 | dari     | Alpine grass type | 41 | 19 | 48 |
| 97.09206 | 32.91161 | yushu    | Alpine grass type | 20 | 21 | 40 |
| 96.31361 | 32.25842 | nangqian | Alpine grass type | 33 | 23 | 43 |
| 100.0631 | 34.52242 | maqin    | Alpine grass type | 37 | 24 | 43 |
| 100.0631 | 34.52242 | maqin    | Alpine grass type | 35 | 22 | 46 |
| 101.8019 | 35.06211 | zeku     | Alpine grass type | 23 | 19 | 41 |
| 100.222  | 33.41953 | dari     | Alpine grass type | 44 | 20 | 47 |
| 99.71778 | 33.72694 | dari     | Alpine grass type | 43 | 20 | 46 |
| 97.09083 | 32.84389 | yushu    | Alpine grass type | 19 | 14 | 46 |
| 99.82975 | 34.59606 | maqin    | Alpine grass type | 58 | 21 | 46 |
| 101.6119 | 35.08781 | zeku     | Alpine grass type | 20 | 17 | 42 |
| 101.4573 | 35.03775 | zeku     | Alpine grass type | 18 | 17 | 40 |
| 100.222  | 33.41953 | dari     | Alpine grass type | 44 | 20 | 47 |
| 97.09083 | 32.84389 | yushu    | Alpine grass type | 28 | 22 | 47 |

|          |          |          |                                 |    |    |    |
|----------|----------|----------|---------------------------------|----|----|----|
| 95.63556 | 32.93406 | zaduo    | Alpine grass type               | 34 | 21 | 48 |
| 99.71778 | 33.72694 | dari     | Alpine grass type               | 43 | 20 | 46 |
| 99.25672 | 33.62003 | dari     | Alpine grass type               | 39 | 18 | 53 |
| 99.54389 | 33.37861 | dari     | Alpine grass type               | 49 | 17 | 54 |
| 98.96917 | 33.68694 | dari     | Alpine grass type               | 48 | 18 | 54 |
| 99       | 33.68333 | dari     | Alpine grass type               | 41 | 19 | 48 |
| 97.09206 | 32.91161 | yushu    | Alpine grass type               | 20 | 21 | 40 |
| 101.8019 | 35.06211 | zeku     | Alpine grass type               | 31 | 18 | 51 |
| 99.55403 | 35.76206 | xinghai  | Alpine grass type               | 37 | 16 | 60 |
| 101.8019 | 35.06211 | zeku     | Alpine grass type               | 23 | 19 | 41 |
| 99.53522 | 33.36881 | dari     | Alpine grass type               | 45 | 16 | 56 |
| 96.31361 | 32.25842 | nangqian | Alpine grass type               | 33 | 23 | 43 |
| 99.55403 | 35.76206 | xinghai  | Alpine grass type               | 37 | 16 | 60 |
| 99.82956 | 34.59656 | maqin    | Alpine grass type               | 56 | 20 | 48 |
| 101.6119 | 35.08781 | zeku     | Alpine grass type               | 20 | 17 | 42 |
| 101.8019 | 35.06211 | zeku     | Alpine grass type               | 23 | 19 | 41 |
| 92.37719 | 34.112   | geermu   | Alpine grass type               | 18 | 17 | 56 |
| 97.09083 | 32.84389 | yushu    | Alpine grass type               | 28 | 22 | 47 |
| 95.63556 | 32.93406 | zaduo    | Alpine grass type               | 34 | 21 | 48 |
| 99.71778 | 33.72694 | dari     | Alpine grass type               | 43 | 20 | 46 |
| 99.25672 | 33.62003 | dari     | Alpine grass type               | 39 | 18 | 53 |
| 99.53522 | 33.36881 | dari     | Alpine grass type               | 45 | 16 | 56 |
| 99.54389 | 33.37861 | dari     | Alpine grass type               | 49 | 17 | 54 |
| 98.96917 | 33.68694 | dari     | Alpine grass type               | 48 | 18 | 54 |
| 99       | 33.68333 | dari     | Alpine grass type               | 41 | 19 | 48 |
| 99.71778 | 33.72694 | dari     | Alpine grass type               | 46 | 18 | 48 |
| 101.2225 | 35.51833 | guinan   | Alpine grass type               | 19 | 18 | 40 |
| 99.82975 | 34.59606 | maqin    | Alpine grass type               | 58 | 21 | 46 |
| 101.6119 | 35.08781 | zeku     | Alpine grass type               | 20 | 17 | 42 |
| 101.8019 | 35.06211 | zeku     | Alpine grass type               | 23 | 19 | 41 |
| 100.222  | 33.41953 | dari     | Alpine grass type               | 44 | 20 | 47 |
| 95.63556 | 32.93406 | zaduo    | Alpine grass type               | 34 | 21 | 48 |
| 99.25672 | 33.62003 | dari     | Alpine grass type               | 39 | 18 | 53 |
| 99.54389 | 33.37861 | dari     | Alpine grass type               | 49 | 17 | 54 |
| 98.96917 | 33.68694 | dari     | Alpine grass type               | 48 | 18 | 54 |
| 99       | 33.68333 | dari     | Alpine grass type               | 41 | 19 | 48 |
| 97.09206 | 32.91161 | yushu    | Alpine grass type               | 20 | 21 | 40 |
| 96.31361 | 32.25842 | nangqian | Alpine grass type               | 33 | 23 | 43 |
| 95.88131 | 34.14158 | qumalai  | Alpine sycamore, Stipa purpurea | 18 | 17 | 40 |
| 95.76672 | 33.78969 | zhiduo   | Alpine sycamore, Stipa purpurea | 45 | 18 | 50 |
| 95.88131 | 34.14158 | qumalai  | Alpine sycamore, Stipa purpurea | 22 | 14 | 44 |
| 95.84186 | 34.24858 | qumalai  | Alpine sycamore, Stipa purpurea | 33 | 20 | 48 |
| 95.88131 | 34.14158 | qumalai  | Alpine sycamore, Stipa purpurea | 28 | 19 | 47 |
| 95.76672 | 33.78969 | zhiduo   | Alpine sycamore, Stipa purpurea | 35 | 20 | 50 |

|          |          |          |                                   |    |    |    |
|----------|----------|----------|-----------------------------------|----|----|----|
| 95.84197 | 34.24864 | qumalai  | Alpine sycamore, Stipa purpurea   | 33 | 20 | 48 |
| 95.88131 | 34.14158 | qumalai  | Alpine sycamore, Stipa purpurea   | 28 | 19 | 47 |
| 95.84197 | 34.24864 | qumalai  | Alpine sycamore, Stipa purpurea   | 33 | 20 | 48 |
| 95.88131 | 34.14158 | qumalai  | Alpine sycamore, Stipa purpurea   | 28 | 19 | 47 |
| 95.76672 | 33.78969 | zhiduo   | Alpine sycamore, Stipa purpurea   | 35 | 20 | 50 |
| 95.84197 | 34.24864 | qumalai  | Alpine sycamore, Stipa purpurea   | 33 | 20 | 32 |
| 95.88131 | 34.14158 | qumalai  | Alpine sycamore, Stipa purpurea   | 28 | 19 | 34 |
| 95.76672 | 33.78969 | zhiduo   | Alpine sycamore, Stipa purpurea   | 35 | 20 | 30 |
| 95.88131 | 34.14158 | qumalai  | Alpine sycamore, Stipa purpurea   | 28 | 19 | 47 |
| 95.76672 | 33.78969 | zhiduo   | Alpine sycamore, Stipa purpurea   | 35 | 20 | 50 |
| 95.84197 | 34.24864 | qumalai  | Alpine sycamore, Stipa purpurea   | 33 | 20 | 48 |
| 95.84197 | 34.24864 | qumalai  | Alpine sycamore, Stipa purpurea   | 33 | 20 | 48 |
| 95.88131 | 34.14158 | qumalai  | Alpine sycamore, Stipa purpurea   | 28 | 19 | 47 |
| 95.76672 | 33.78969 | zhiduo   | Alpine sycamore, Stipa purpurea   | 35 | 20 | 50 |
| 95.84197 | 34.24864 | qumalai  | Alpine sycamore, Stipa purpurea   | 33 | 20 | 48 |
| 95.88131 | 34.14158 | qumalai  | Alpine sycamore, Stipa purpurea   | 28 | 19 | 47 |
| 95.76672 | 33.78969 | zhiduo   | Alpine sycamore, Stipa purpurea   | 35 | 20 | 50 |
| 95.84197 | 34.24864 | qumalai  | Alpine sycamore, Stipa purpurea   | 33 | 20 | 48 |
| 95.88131 | 34.14158 | qumalai  | Alpine sycamore, Stipa purpurea   | 28 | 19 | 47 |
| 95.76672 | 33.78969 | zhiduo   | Alpine sycamore, Stipa purpurea   | 35 | 20 | 50 |
| 95.339   | 33.88797 | zhiduo   | Alpine sycamore, Stipa purpurea   | 25 | 17 | 42 |
| 95.88131 | 34.14158 | qumalai  | Alpine sycamore, Stipa purpurea   | 28 | 19 | 47 |
| 95.76672 | 33.78969 | zhiduo   | Alpine sycamore, Stipa purpurea   | 35 | 20 | 50 |
| 95.88131 | 34.14158 | qumalai  | Alpine sycamore, Stipa purpurea   | 28 | 19 | 47 |
| 95.76672 | 33.78969 | zhiduo   | Alpine sycamore, Stipa purpurea   | 35 | 20 | 50 |
| 95.339   | 33.88797 | zhiduo   | Alpine sycamore, Stipa purpurea   | 37 | 16 | 59 |
| 95.84197 | 34.24864 | qumalai  | Alpine sycamore, Stipa purpurea   | 33 | 20 | 48 |
| 95.88131 | 34.14158 | qumalai  | Alpine sycamore, Stipa purpurea   | 17 | 18 | 44 |
| 95.84197 | 34.24864 | qumalai  | Alpine sycamore, Stipa purpurea   | 33 | 20 | 48 |
| 95.88131 | 34.14158 | qumalai  | Alpine sycamore, Stipa purpurea   | 28 | 19 | 47 |
| 95.76672 | 33.78969 | zhiduo   | Alpine sycamore, Stipa purpurea   | 35 | 20 | 50 |
| 95.84197 | 34.24864 | qumalai  | Alpine sycamore, Stipa purpurea   | 33 | 20 | 48 |
| 95.88131 | 34.14158 | qumalai  | Alpine sycamore, Stipa purpurea   | 28 | 19 | 47 |
| 95.76672 | 33.78969 | zhiduo   | Alpine sycamore, Stipa purpurea   | 35 | 20 | 50 |
| 101.6895 | 35.77036 | jianzha  | Alpine pine grass, bluegrass type | 29 | 18 | 41 |
| 95.69417 | 33.92142 | zhiduo   | Alpine pine grass, weeds          | 17 | 20 | 32 |
| 95.35969 | 34.52083 | qumalai  | Alpine pine grass, weeds          | 39 | 17 | 55 |
| 100.1723 | 34.17114 | gande    | Alpine pine grass, weeds          | 40 | 20 | 49 |
| 95.36436 | 34.52036 | qumalai  | Alpine pine grass, weeds          | 38 | 17 | 55 |
| 97.32558 | 33.38047 | chengduo | Alpine pine grass, weeds          | 18 | 15 | 46 |
| 101.0058 | 35.1945  | zeku     | Alpine pine grass, weeds          | 28 | 20 | 39 |
| 95.69417 | 33.92142 | zhiduo   | Alpine pine grass, weeds          | 17 | 20 | 32 |
| 97.32389 | 33.37806 | chengduo | Alpine pine grass, weeds          | 18 | 15 | 46 |
| 101.0058 | 35.1945  | zeku     | Alpine pine grass, weeds          | 28 | 20 | 39 |
| 100.8917 | 34.89844 | tongde   | Alpine pine grass, weeds          | 25 | 20 | 40 |
| 95.36022 | 34.53725 | qumalai  | Alpine pine grass, weeds          | 37 | 18 | 54 |
| 95.69417 | 33.92142 | zhiduo   | Alpine pine grass, weeds          | 17 | 20 | 32 |

|          |          |          |                          |    |    |    |
|----------|----------|----------|--------------------------|----|----|----|
| 95.69989 | 33.90256 | zhiduo   | Alpine pine grass, weeds | 18 | 20 | 32 |
| 100.1723 | 34.17114 | gande    | Alpine pine grass, weeds | 40 | 20 | 49 |
| 95.36436 | 34.52036 | qumalai  | Alpine pine grass, weeds | 38 | 17 | 55 |
| 95.69961 | 33.90297 | zhiduo   | Alpine pine grass, weeds | 18 | 20 | 32 |
| 101.0058 | 35.1945  | zeku     | Alpine pine grass, weeds | 22 | 14 | 44 |
| 101.0058 | 35.1945  | zeku     | Alpine pine grass, weeds | 28 | 20 | 41 |
| 100.8917 | 34.89844 | tongde   | Alpine pine grass, weeds | 25 | 20 | 40 |
| 95.36022 | 34.53725 | qumalai  | Alpine pine grass, weeds | 37 | 18 | 28 |
| 100.1723 | 34.17114 | gande    | Alpine pine grass, weeds | 40 | 20 | 31 |
| 95.36436 | 34.52036 | qumalai  | Alpine pine grass, weeds | 38 | 17 | 28 |
| 95.69417 | 33.92142 | zhiduo   | Alpine pine grass, weeds | 17 | 20 | 48 |
| 95.69989 | 33.90256 | zhiduo   | Alpine pine grass, weeds | 18 | 20 | 48 |
| 95.69961 | 33.90297 | zhiduo   | Alpine pine grass, weeds | 18 | 20 | 48 |
| 100.1723 | 34.17114 | gande    | Alpine pine grass, weeds | 34 | 21 | 45 |
| 95.69961 | 33.90297 | zhiduo   | Alpine pine grass, weeds | 17 | 17 | 39 |
| 100.8917 | 34.89844 | tongde   | Alpine pine grass, weeds | 25 | 20 | 40 |
| 95.36022 | 34.53725 | qumalai  | Alpine pine grass, weeds | 37 | 18 | 54 |
| 95.36436 | 34.52036 | qumalai  | Alpine pine grass, weeds | 38 | 17 | 55 |
| 97.32389 | 33.37806 | chengduo | Alpine pine grass, weeds | 18 | 15 | 46 |
| 95.69989 | 33.90256 | zhiduo   | Alpine pine grass, weeds | 18 | 20 | 32 |
| 95.69961 | 33.90297 | zhiduo   | Alpine pine grass, weeds | 18 | 20 | 32 |
| 101.0058 | 35.1945  | zeku     | Alpine pine grass, weeds | 28 | 20 | 39 |
| 101.0058 | 35.1945  | zeku     | Alpine pine grass, weeds | 28 | 20 | 39 |
| 100.8917 | 34.89844 | tongde   | Alpine pine grass, weeds | 25 | 20 | 40 |
| 95.69417 | 33.92142 | zhiduo   | Alpine pine grass, weeds | 17 | 20 | 32 |
| 95.69961 | 33.90297 | zhiduo   | Alpine pine grass, weeds | 18 | 20 | 32 |
| 100.1723 | 34.17114 | gande    | Alpine pine grass, weeds | 40 | 20 | 49 |
| 97.32389 | 33.37806 | chengduo | Alpine pine grass, weeds | 18 | 15 | 46 |
| 97.32558 | 33.38047 | chengduo | Alpine pine grass, weeds | 18 | 15 | 46 |
| 100.8917 | 34.89844 | tongde   | Alpine pine grass, weeds | 25 | 20 | 40 |
| 95.36022 | 34.53725 | qumalai  | Alpine pine grass, weeds | 37 | 18 | 54 |
| 100.1723 | 34.17114 | gande    | Alpine pine grass, weeds | 40 | 20 | 49 |
| 95.36436 | 34.52036 | qumalai  | Alpine pine grass, weeds | 38 | 17 | 55 |
| 97.32389 | 33.37806 | chengduo | Alpine pine grass, weeds | 18 | 15 | 46 |
| 97.32558 | 33.38047 | chengduo | Alpine pine grass, weeds | 18 | 15 | 46 |
| 95.69417 | 33.92142 | zhiduo   | Alpine pine grass, weeds | 17 | 20 | 32 |
| 101.0058 | 35.1945  | zeku     | Alpine pine grass, weeds | 28 | 20 | 39 |
| 95.69989 | 33.90256 | zhiduo   | Alpine pine grass, weeds | 18 | 20 | 32 |
| 101.0058 | 35.1945  | zeku     | Alpine pine grass, weeds | 28 | 20 | 39 |
| 100.8917 | 34.89844 | tongde   | Alpine pine grass, weeds | 25 | 20 | 40 |
| 100.1723 | 34.17114 | gande    | Alpine pine grass, weeds | 40 | 20 | 49 |
| 95.36436 | 34.52036 | qumalai  | Alpine pine grass, weeds | 38 | 17 | 55 |
| 95.41019 | 33.83667 | zhiduo   | Alpine pine grass, weeds | 33 | 20 | 51 |
| 97.32389 | 33.37806 | chengduo | Alpine pine grass, weeds | 18 | 15 | 46 |

|          |          |          |                                      |    |    |    |
|----------|----------|----------|--------------------------------------|----|----|----|
| 100.8917 | 34.89844 | tongde   | Alpine pine grass, weeds             | 45 | 16 | 56 |
| 95.69417 | 33.92142 | zhiduo   | Alpine pine grass, weeds             | 17 | 20 | 32 |
| 95.69989 | 33.90256 | zhiduo   | Alpine pine grass, weeds             | 18 | 20 | 32 |
| 95.69961 | 33.90297 | zhiduo   | Alpine pine grass, weeds             | 18 | 20 | 32 |
| 101.0058 | 35.1945  | zeku     | Alpine pine grass, weeds             | 28 | 20 | 39 |
| 95.36022 | 34.53725 | qumalai  | Alpine pine grass, weeds             | 37 | 18 | 54 |
| 97.32558 | 33.38047 | chengduo | Alpine pine grass, weeds             | 18 | 15 | 46 |
| 100.8917 | 34.89844 | tongde   | Alpine pine grass, weeds             | 25 | 20 | 40 |
| 95.36022 | 34.53725 | qumalai  | Alpine pine grass, weeds             | 37 | 18 | 54 |
| 100.1723 | 34.17114 | gande    | Alpine pine grass, weeds             | 40 | 20 | 49 |
| 97.32389 | 33.37806 | chengduo | Alpine pine grass, weeds             | 18 | 15 | 46 |
| 95.69417 | 33.92142 | zhiduo   | Alpine pine grass, weeds             | 17 | 20 | 32 |
| 95.36436 | 34.52036 | qumalai  | Alpine pine grass, weeds             | 38 | 17 | 55 |
| 95.41019 | 33.83667 | zhiduo   | Alpine pine grass, weeds             | 33 | 20 | 51 |
| 97.32558 | 33.38047 | chengduo | Alpine pine grass, weeds             | 18 | 15 | 46 |
| 95.69989 | 33.90256 | zhiduo   | Alpine pine grass, weeds             | 18 | 20 | 32 |
| 101.0058 | 35.1945  | zeku     | Alpine pine grass, weeds             | 28 | 20 | 39 |
| 100.8016 | 35.26756 | tongde   | Alpine pine grass, weeds             | 17 | 19 | 51 |
| 100.8917 | 34.89844 | tongde   | Alpine pine grass, weeds             | 25 | 20 | 40 |
| 100.1723 | 34.17114 | gande    | Alpine pine grass, weeds             | 40 | 20 | 49 |
| 95.36436 | 34.52036 | qumalai  | Alpine pine grass, weeds             | 38 | 17 | 55 |
| 95.41019 | 33.83667 | zhiduo   | Alpine pine grass, weeds             | 33 | 20 | 51 |
| 97.32558 | 33.38047 | chengduo | Alpine pine grass, weeds             | 18 | 15 | 46 |
| 95.69417 | 33.92142 | zhiduo   | Alpine pine grass, weeds             | 17 | 20 | 32 |
| 95.69989 | 33.90256 | zhiduo   | Alpine pine grass, weeds             | 18 | 20 | 32 |
| 95.69961 | 33.90297 | zhiduo   | Alpine pine grass, weeds             | 18 | 20 | 32 |
| 101.0058 | 35.1945  | zeku     | Alpine pine grass, weeds             | 28 | 20 | 39 |
| 100.8917 | 34.89844 | tongde   | Alpine pine grass, weeds             | 25 | 20 | 40 |
| 95.36022 | 34.53725 | qumalai  | Alpine pine grass, weeds             | 37 | 18 | 54 |
| 95.36436 | 34.52036 | qumalai  | Alpine pine grass, weeds             | 38 | 17 | 55 |
| 95.36917 | 32.87139 | zaduo    | Alpine pine grass, weeds             | 39 | 23 | 46 |
| 95.41019 | 33.83667 | zhiduo   | Alpine pine grass, weeds             | 33 | 20 | 51 |
| 97.32389 | 33.37806 | chengduo | Alpine pine grass, weeds             | 18 | 15 | 46 |
| 97.32558 | 33.38047 | chengduo | Alpine pine grass, weeds             | 18 | 15 | 46 |
| 95.69989 | 33.90256 | zhiduo   | Alpine pine grass, weeds             | 18 | 20 | 32 |
| 95.69961 | 33.90297 | zhiduo   | Alpine pine grass, weeds             | 18 | 20 | 32 |
| 95.69417 | 33.92142 | zhiduo   | Alpine pine grass, weeds             | 17 | 20 | 32 |
| 95.41019 | 33.83667 | zhiduo   | Alpine pine grass, weeds             | 19 | 22 | 39 |
| 97.24167 | 33.35611 | chengduo | Alpine sagebrush, Polygonum vulgaris | 34 | 22 | 44 |
| 96.10728 | 32.33303 | nangqian | Alpine sagebrush, Polygonum vulgaris | 26 | 21 | 40 |
| 96.38972 | 32.46972 | nangqian | Alpine sagebrush, Polygonum vulgaris | 18 | 20 | 47 |
| 97.21094 | 33.34397 | chengduo | Alpine sagebrush, Polygonum vulgaris | 34 | 20 | 49 |
| 96.10706 | 32.327   | nangqian | Alpine sagebrush, Polygonum vulgaris | 25 | 20 | 43 |
| 96.17417 | 32.29611 | nangqian | Alpine sagebrush, Polygonum vulgaris | 37 | 24 | 43 |

|          |          |          |                                      |    |    |    |
|----------|----------|----------|--------------------------------------|----|----|----|
| 96.17322 | 32.29667 | nangqian | Alpine sagebrush, Polygonum vulgaris | 37 | 24 | 43 |
| 96.38931 | 32.46942 | nangqian | Alpine sagebrush, Polygonum vulgaris | 18 | 20 | 47 |
| 96.38931 | 32.46942 | nangqian | Alpine sagebrush, Polygonum vulgaris | 18 | 20 | 47 |
| 96.17417 | 32.29611 | nangqian | Alpine sagebrush, Polygonum vulgaris | 37 | 24 | 43 |
| 96.17322 | 32.29667 | nangqian | Alpine sagebrush, Polygonum vulgaris | 37 | 24 | 43 |
| 96.69472 | 33.12333 | yushu    | Alpine sagebrush, Polygonum vulgaris | 34 | 22 | 45 |
| 96.10706 | 32.327   | nangqian | Alpine sagebrush, Polygonum vulgaris | 25 | 20 | 43 |
| 96.69472 | 33.12333 | yushu    | Alpine sagebrush, Polygonum vulgaris | 34 | 22 | 33 |
| 96.38931 | 32.46942 | nangqian | Alpine sagebrush, Polygonum vulgaris | 18 | 20 | 33 |
| 96.17417 | 32.29611 | nangqian | Alpine sagebrush, Polygonum vulgaris | 37 | 24 | 33 |
| 96.17322 | 32.29667 | nangqian | Alpine sagebrush, Polygonum vulgaris | 37 | 24 | 32 |
| 96.10706 | 32.327   | nangqian | Alpine sagebrush, Polygonum vulgaris | 25 | 20 | 37 |
| 97.21094 | 33.34397 | chengduo | Alpine sagebrush, Polygonum vulgaris | 34 | 20 | 49 |
| 96.69472 | 33.12333 | yushu    | Alpine sagebrush, Polygonum vulgaris | 34 | 22 | 45 |
| 96.38931 | 32.46942 | nangqian | Alpine sagebrush, Polygonum vulgaris | 18 | 20 | 47 |
| 96.10706 | 32.327   | nangqian | Alpine sagebrush, Polygonum vulgaris | 25 | 20 | 43 |
| 96.17417 | 32.29611 | nangqian | Alpine sagebrush, Polygonum vulgaris | 37 | 24 | 43 |
| 96.17322 | 32.29667 | nangqian | Alpine sagebrush, Polygonum vulgaris | 37 | 24 | 43 |
| 96.38931 | 32.46942 | nangqian | Alpine sagebrush, Polygonum vulgaris | 24 | 17 | 46 |
| 96.69472 | 33.12333 | yushu    | Alpine sagebrush, Polygonum vulgaris | 34 | 22 | 45 |
| 96.38931 | 32.46942 | nangqian | Alpine sagebrush, Polygonum vulgaris | 18 | 20 | 47 |
| 96.10706 | 32.327   | nangqian | Alpine sagebrush, Polygonum vulgaris | 25 | 20 | 43 |
| 96.17417 | 32.29611 | nangqian | Alpine sagebrush, Polygonum vulgaris | 37 | 24 | 43 |
| 96.17322 | 32.29667 | nangqian | Alpine sagebrush, Polygonum vulgaris | 37 | 24 | 43 |
| 97.21094 | 33.34397 | chengduo | Alpine sagebrush, Polygonum vulgaris | 34 | 20 | 49 |
| 96.38931 | 32.46942 | nangqian | Alpine sagebrush, Polygonum vulgaris | 18 | 20 | 47 |
| 96.17417 | 32.29611 | nangqian | Alpine sagebrush, Polygonum vulgaris | 37 | 24 | 43 |
| 96.38931 | 32.46942 | nangqian | Alpine sagebrush, Polygonum vulgaris | 33 | 23 | 43 |
| 96.69472 | 33.12333 | yushu    | Alpine sagebrush, Polygonum vulgaris | 34 | 22 | 45 |
| 96.10706 | 32.327   | nangqian | Alpine sagebrush, Polygonum vulgaris | 25 | 20 | 43 |
| 97.21094 | 33.34397 | chengduo | Alpine sagebrush, Polygonum vulgaris | 34 | 20 | 49 |
| 96.69472 | 33.12333 | yushu    | Alpine sagebrush, Polygonum vulgaris | 34 | 22 | 45 |
| 96.38931 | 32.46942 | nangqian | Alpine sagebrush, Polygonum vulgaris | 18 | 20 | 47 |
| 96.10706 | 32.327   | nangqian | Alpine sagebrush, Polygonum vulgaris | 25 | 20 | 43 |
| 96.17417 | 32.29611 | nangqian | Alpine sagebrush, Polygonum vulgaris | 37 | 24 | 43 |
| 97.21094 | 33.34397 | chengduo | Alpine sagebrush, Polygonum vulgaris | 20 | 21 | 40 |
| 97.21094 | 33.34397 | chengduo | Alpine sagebrush, Polygonum vulgaris | 34 | 20 | 49 |
| 96.38931 | 32.46942 | nangqian | Alpine sagebrush, Polygonum vulgaris | 18 | 20 | 47 |
| 96.17417 | 32.29611 | nangqian | Alpine sagebrush, Polygonum vulgaris | 37 | 24 | 43 |
| 96.17322 | 32.29667 | nangqian | Alpine sagebrush, Polygonum vulgaris | 37 | 24 | 43 |
| 96.17417 | 32.29611 | nangqian | Alpine sagebrush, Polygonum vulgaris | 37 | 24 | 43 |
| 96.69472 | 33.12333 | yushu    | Alpine sagebrush, Polygonum vulgaris | 34 | 22 | 45 |
| 96.10706 | 32.327   | nangqian | Alpine sagebrush, Polygonum vulgaris | 25 | 20 | 43 |
| 97.21094 | 33.34397 | chengduo | Alpine sagebrush, Polygonum vulgaris | 34 | 20 | 49 |

|          |          |          |                                        |    |    |    |
|----------|----------|----------|----------------------------------------|----|----|----|
| 96.69472 | 33.12333 | yushu    | Alpine sagebrush, Polygonum vulgaris   | 34 | 22 | 45 |
| 96.38931 | 32.46942 | nangqian | Alpine sagebrush, Polygonum vulgaris   | 18 | 20 | 47 |
| 96.10706 | 32.327   | nangqian | Alpine sagebrush, Polygonum vulgaris   | 25 | 20 | 43 |
| 97.21094 | 33.34397 | chengduo | Alpine sagebrush, Polygonum vulgaris   | 34 | 20 | 49 |
| 96.38931 | 32.46942 | nangqian | Alpine sagebrush, Polygonum vulgaris   | 18 | 20 | 47 |
| 96.17417 | 32.29611 | nangqian | Alpine sagebrush, Polygonum vulgaris   | 37 | 24 | 43 |
| 96.17322 | 32.29667 | nangqian | Alpine sagebrush, Polygonum vulgaris   | 37 | 24 | 43 |
| 96.38931 | 32.46942 | nangqian | Alpine sagebrush, Polygonum vulgaris   | 24 | 20 | 39 |
| 95.835   | 34.08317 | qumalai  | Alpine sylvestris, Heterospina species | 33 | 17 | 54 |
| 96.75131 | 32.90194 | yushu    | Alpine sylvestris, Heterospina species | 33 | 19 | 55 |
| 96.96669 | 32.86    | yushu    | Alpine sylvestris, Heterospina species | 30 | 18 | 55 |
| 95.58328 | 33.81972 | zhiduo   | Alpine sylvestris, Heterospina species | 38 | 20 | 49 |
| 96.96669 | 32.86    | yushu    | Alpine sylvestris, Heterospina species | 18 | 19 | 35 |
| 97.19819 | 33.73894 | chengduo | Alpine sylvestris, Heterospina species | 30 | 18 | 51 |
| 95.20292 | 32.91753 | zaduo    | Alpine sylvestris, Heterospina species | 32 | 24 | 44 |
| 95.835   | 34.08317 | qumalai  | Alpine sylvestris, Heterospina species | 20 | 17 | 42 |
| 95.20292 | 32.91753 | zaduo    | Alpine sylvestris, Heterospina species | 49 | 17 | 54 |
| 95.83442 | 34.08278 | qumalai  | Alpine sylvestris, Heterospina species | 34 | 17 | 54 |
| 96.75131 | 32.90194 | yushu    | Alpine sylvestris, Heterospina species | 33 | 19 | 55 |
| 96.96669 | 32.86    | yushu    | Alpine sylvestris, Heterospina species | 30 | 18 | 55 |
| 95.58328 | 33.81972 | zhiduo   | Alpine sylvestris, Heterospina species | 38 | 20 | 49 |
| 94.99622 | 32.85094 | zaduo    | Alpine sylvestris, Heterospina species | 35 | 22 | 46 |
| 94.98557 | 32.84819 | zaduo    | Alpine sylvestris, Heterospina species | 35 | 22 | 48 |
| 94.99605 | 32.85115 | zaduo    | Alpine sylvestris, Heterospina species | 35 | 22 | 46 |
| 96.55961 | 32.88922 | yushu    | Alpine sylvestris, Heterospina species | 36 | 19 | 51 |
| 97.08528 | 32.84389 | yushu    | Alpine sylvestris, Heterospina species | 28 | 21 | 48 |
| 95.17033 | 32.68833 | zaduo    | Alpine sylvestris, Heterospina species | 30 | 19 | 52 |
| 95.20292 | 32.91753 | zaduo    | Alpine sylvestris, Heterospina species | 32 | 24 | 44 |
| 95.17031 | 32.66144 | zaduo    | Alpine sylvestris, Heterospina species | 31 | 22 | 49 |
| 96.75131 | 32.90194 | yushu    | Alpine sylvestris, Heterospina species | 33 | 19 | 55 |
| 96.96669 | 32.86    | yushu    | Alpine sylvestris, Heterospina species | 30 | 18 | 55 |
| 95.58328 | 33.81972 | zhiduo   | Alpine sylvestris, Heterospina species | 38 | 20 | 49 |
| 96.55958 | 32.88908 | yushu    | Alpine sylvestris, Heterospina species | 36 | 19 | 51 |
| 94.99622 | 32.85094 | zaduo    | Alpine sylvestris, Heterospina species | 35 | 22 | 46 |
| 94.98557 | 32.84819 | zaduo    | Alpine sylvestris, Heterospina species | 35 | 22 | 48 |
| 94.99605 | 32.85115 | zaduo    | Alpine sylvestris, Heterospina species | 35 | 22 | 46 |
| 96.55961 | 32.88922 | yushu    | Alpine sylvestris, Heterospina species | 36 | 19 | 51 |
| 97.08528 | 32.84389 | yushu    | Alpine sylvestris, Heterospina species | 28 | 21 | 48 |
| 95.17903 | 32.66297 | zaduo    | Alpine sylvestris, Heterospina species | 33 | 20 | 51 |
| 95.17033 | 32.68833 | zaduo    | Alpine sylvestris, Heterospina species | 30 | 19 | 52 |
| 95.83442 | 34.08278 | qumalai  | Alpine sylvestris, Heterospina species | 34 | 17 | 54 |
| 95.20292 | 32.91753 | zaduo    | Alpine sylvestris, Heterospina species | 32 | 24 | 44 |
| 95.17075 | 32.68883 | zaduo    | Alpine sylvestris, Heterospina species | 30 | 19 | 52 |
| 95.20292 | 32.91753 | zaduo    | Alpine sylvestris, Heterospina species | 17 | 17 | 43 |



|          |          |          |                                        |    |    |    |
|----------|----------|----------|----------------------------------------|----|----|----|
| 95.20292 | 32.91753 | zaduo    | Alpine sylvestris, Heterospina species | 32 | 24 | 32 |
| 95.58328 | 33.81972 | zhiduo   | Alpine sylvestris, Heterospina species | 38 | 20 | 31 |
| 94.98557 | 32.84819 | zaduo    | Alpine sylvestris, Heterospina species | 35 | 22 | 31 |
| 96.75131 | 32.90194 | yushu    | Alpine sylvestris, Heterospina species | 33 | 19 | 27 |
| 97.08528 | 32.84389 | yushu    | Alpine sylvestris, Heterospina species | 28 | 21 | 31 |
| 95.17903 | 32.66297 | zaduo    | Alpine sylvestris, Heterospina species | 33 | 20 | 29 |
| 95.17075 | 32.68883 | zaduo    | Alpine sylvestris, Heterospina species | 30 | 19 | 29 |
| 95.17033 | 32.68833 | zaduo    | Alpine sylvestris, Heterospina species | 30 | 19 | 29 |
| 97.20311 | 33.34872 | chengduo | Alpine sylvestris, Heterospina species | 38 | 21 | 46 |
| 95.83442 | 34.08278 | qumalai  | Alpine sylvestris, Heterospina species | 34 | 17 | 28 |
| 97.20311 | 33.34872 | chengduo | Alpine sylvestris, Heterospina species | 33 | 21 | 33 |
| 96.96669 | 32.86    | yushu    | Alpine sylvestris, Heterospina species | 30 | 18 | 27 |
| 94.99622 | 32.85094 | zaduo    | Alpine sylvestris, Heterospina species | 35 | 22 | 33 |
| 94.99605 | 32.85115 | zaduo    | Alpine sylvestris, Heterospina species | 35 | 22 | 33 |
| 96.55961 | 32.88922 | yushu    | Alpine sylvestris, Heterospina species | 36 | 19 | 29 |
| 97.20311 | 33.34872 | chengduo | Alpine sylvestris, Heterospina species | 33 | 21 | 47 |
| 96.55958 | 32.88908 | yushu    | Alpine sylvestris, Heterospina species | 36 | 19 | 51 |
| 95.20292 | 32.91753 | zaduo    | Alpine sylvestris, Heterospina species | 32 | 24 | 44 |
| 95.58328 | 33.81972 | zhiduo   | Alpine sylvestris, Heterospina species | 38 | 20 | 49 |
| 96.75131 | 32.90194 | yushu    | Alpine sylvestris, Heterospina species | 33 | 19 | 55 |
| 96.55961 | 32.88922 | yushu    | Alpine sylvestris, Heterospina species | 36 | 19 | 51 |
| 97.08528 | 32.84389 | yushu    | Alpine sylvestris, Heterospina species | 28 | 21 | 48 |
| 95.17075 | 32.68883 | zaduo    | Alpine sylvestris, Heterospina species | 30 | 19 | 52 |
| 95.58328 | 33.81972 | zhiduo   | Alpine sylvestris, Heterospina species | 35 | 22 | 46 |
| 95.58328 | 33.81972 | zhiduo   | Alpine sylvestris, Heterospina species | 32 | 21 | 50 |
| 96.96669 | 32.86    | yushu    | Alpine sylvestris, Heterospina species | 30 | 18 | 55 |
| 94.99622 | 32.85094 | zaduo    | Alpine sylvestris, Heterospina species | 35 | 22 | 46 |
| 94.99605 | 32.85115 | zaduo    | Alpine sylvestris, Heterospina species | 35 | 22 | 46 |
| 95.17033 | 32.68833 | zaduo    | Alpine sylvestris, Heterospina species | 30 | 19 | 52 |
| 96.96669 | 32.86    | yushu    | Alpine sylvestris, Heterospina species | 30 | 18 | 55 |
| 96.55958 | 32.88908 | yushu    | Alpine sylvestris, Heterospina species | 36 | 19 | 51 |
| 94.98556 | 32.84819 | zaduo    | Alpine sylvestris, Heterospina species | 35 | 22 | 48 |
| 94.99606 | 32.85114 | zaduo    | Alpine sylvestris, Heterospina species | 35 | 22 | 46 |
| 96.75131 | 32.90194 | yushu    | Alpine sylvestris, Heterospina species | 33 | 19 | 55 |
| 96.55961 | 32.88922 | yushu    | Alpine sylvestris, Heterospina species | 36 | 19 | 51 |
| 95.17903 | 32.66297 | zaduo    | Alpine sylvestris, Heterospina species | 33 | 20 | 51 |
| 95.17075 | 32.68883 | zaduo    | Alpine sylvestris, Heterospina species | 30 | 19 | 52 |
| 96.55961 | 32.88922 | yushu    | Alpine sylvestris, Heterospina species | 36 | 19 | 51 |
| 97.20311 | 33.34872 | chengduo | Alpine sylvestris, Heterospina species | 33 | 21 | 47 |
| 95.58328 | 33.81972 | zhiduo   | Alpine sylvestris, Heterospina species | 38 | 20 | 49 |
| 95.339   | 33.88797 | zhiduo   | Alpine sylvestris, Heterospina species | 34 | 19 | 52 |
| 97.20311 | 33.34872 | chengduo | Alpine sylvestris, Heterospina species | 33 | 21 | 47 |
| 96.96669 | 32.86    | yushu    | Alpine sylvestris, Heterospina species | 30 | 18 | 55 |
| 95.20292 | 32.91753 | zaduo    | Alpine sylvestris, Heterospina species | 32 | 24 | 44 |

|          |          |          |                                        |    |    |    |
|----------|----------|----------|----------------------------------------|----|----|----|
| 95.20292 | 32.91753 | zaduo    | Alpine sylvestris, Heterospina species | 49 | 17 | 54 |
| 94.99606 | 32.85114 | zaduo    | Alpine sylvestris, Heterospina species | 35 | 22 | 46 |
| 96.75131 | 32.90194 | yushu    | Alpine sylvestris, Heterospina species | 33 | 19 | 55 |
| 97.08528 | 32.84389 | yushu    | Alpine sylvestris, Heterospina species | 28 | 21 | 48 |
| 95.17075 | 32.68883 | zaduo    | Alpine sylvestris, Heterospina species | 30 | 19 | 52 |
| 96.55958 | 32.88908 | yushu    | Alpine sylvestris, Heterospina species | 36 | 19 | 51 |
| 95.58328 | 33.81972 | zhiduo   | Alpine sylvestris, Heterospina species | 38 | 20 | 49 |
| 95.17903 | 32.66297 | zaduo    | Alpine sylvestris, Heterospina species | 33 | 20 | 51 |
| 95.17033 | 32.68833 | zaduo    | Alpine sylvestris, Heterospina species | 30 | 19 | 52 |
| 96.96669 | 32.86    | yushu    | Alpine sylvestris, Heterospina species | 30 | 18 | 55 |
| 96.55958 | 32.88908 | yushu    | Alpine sylvestris, Heterospina species | 36 | 19 | 51 |
| 94.99606 | 32.85114 | zaduo    | Alpine sylvestris, Heterospina species | 35 | 22 | 46 |
| 96.75131 | 32.90194 | yushu    | Alpine sylvestris, Heterospina species | 33 | 19 | 55 |
| 97.08528 | 32.84389 | yushu    | Alpine sylvestris, Heterospina species | 28 | 21 | 48 |
| 95.17903 | 32.66297 | zaduo    | Alpine sylvestris, Heterospina species | 33 | 20 | 51 |
| 95.17075 | 32.68883 | zaduo    | Alpine sylvestris, Heterospina species | 30 | 19 | 52 |
| 95.339   | 33.88797 | zhiduo   | Alpine sylvestris, Heterospina species | 34 | 19 | 52 |
| 97.20311 | 33.34872 | chengduo | Alpine sylvestris, Heterospina species | 33 | 21 | 47 |
| 95.58328 | 33.81972 | zhiduo   | Alpine sylvestris, Heterospina species | 38 | 20 | 49 |
| 94.98556 | 32.84819 | zaduo    | Alpine sylvestris, Heterospina species | 35 | 22 | 48 |
| 96.55961 | 32.88922 | yushu    | Alpine sylvestris, Heterospina species | 36 | 19 | 51 |
| 94.99606 | 32.85114 | zaduo    | Alpine sylvestris, Heterospina species | 22 | 14 | 44 |
| 95.83442 | 34.08278 | qumalai  | Alpine sylvestris, Heterospina species | 34 | 17 | 54 |
| 95.339   | 33.88797 | zhiduo   | Alpine sylvestris, Heterospina species | 34 | 19 | 52 |
| 97.20311 | 33.34872 | chengduo | Alpine sylvestris, Heterospina species | 33 | 21 | 47 |
| 97.34619 | 33.40592 | chengduo | Alpine sylvestris, Heterospina species | 16 | 15 | 48 |
| 96.96669 | 32.86    | yushu    | Alpine sylvestris, Heterospina species | 30 | 18 | 55 |
| 96.55958 | 32.88908 | yushu    | Alpine sylvestris, Heterospina species | 36 | 19 | 51 |
| 95.20292 | 32.91753 | zaduo    | Alpine sylvestris, Heterospina species | 32 | 24 | 44 |
| 95.58328 | 33.81972 | zhiduo   | Alpine sylvestris, Heterospina species | 38 | 20 | 49 |
| 94.99622 | 32.85094 | zaduo    | Alpine sylvestris, Heterospina species | 35 | 22 | 46 |
| 94.98556 | 32.84819 | zaduo    | Alpine sylvestris, Heterospina species | 35 | 22 | 48 |
| 94.99606 | 32.85114 | zaduo    | Alpine sylvestris, Heterospina species | 35 | 22 | 46 |
| 97.08528 | 32.84389 | yushu    | Alpine sylvestris, Heterospina species | 28 | 21 | 48 |
| 95.17903 | 32.66297 | zaduo    | Alpine sylvestris, Heterospina species | 33 | 20 | 51 |
| 95.17903 | 32.66297 | zaduo    | Alpine sylvestris, Heterospina species | 30 | 19 | 52 |
| 96.75131 | 32.90194 | yushu    | Alpine sylvestris, Heterospina species | 33 | 19 | 55 |
| 96.55961 | 32.88922 | yushu    | Alpine sylvestris, Heterospina species | 36 | 19 | 51 |
| 95.17075 | 32.68883 | zaduo    | Alpine sylvestris, Heterospina species | 30 | 19 | 52 |
| 95.17075 | 32.68883 | zaduo    | Alpine sylvestris, Heterospina species | 18 | 19 | 35 |
| 95.17075 | 32.68883 | zaduo    | Alpine sylvestris, Heterospina species | 18 | 19 | 35 |
| 95.83442 | 34.08278 | qumalai  | Alpine sylvestris, Heterospina species | 34 | 17 | 54 |
| 95.339   | 33.88797 | zhiduo   | Alpine sylvestris, Heterospina species | 34 | 19 | 52 |
| 97.20311 | 33.34872 | chengduo | Alpine sylvestris, Heterospina species | 33 | 21 | 47 |

|          |          |          |                                          |    |    |    |
|----------|----------|----------|------------------------------------------|----|----|----|
| 97.34619 | 33.40592 | chengduo | Alpine sylvestris, Heterospina species   | 16 | 15 | 48 |
| 96.96669 | 32.86    | yushu    | Alpine sylvestris, Heterospina species   | 30 | 18 | 55 |
| 96.55958 | 32.88908 | yushu    | Alpine sylvestris, Heterospina species   | 36 | 19 | 51 |
| 95.20292 | 32.91753 | zaduo    | Alpine sylvestris, Heterospina species   | 32 | 24 | 44 |
| 94.99622 | 32.85094 | zaduo    | Alpine sylvestris, Heterospina species   | 35 | 22 | 46 |
| 94.98556 | 32.84819 | zaduo    | Alpine sylvestris, Heterospina species   | 35 | 22 | 48 |
| 94.99606 | 32.85114 | zaduo    | Alpine sylvestris, Heterospina species   | 35 | 22 | 46 |
| 96.75131 | 32.90194 | yushu    | Alpine sylvestris, Heterospina species   | 33 | 19 | 55 |
| 96.55961 | 32.88922 | yushu    | Alpine sylvestris, Heterospina species   | 36 | 19 | 51 |
| 97.08528 | 32.84389 | yushu    | Alpine sylvestris, Heterospina species   | 28 | 21 | 48 |
| 95.17903 | 32.66297 | zaduo    | Alpine sylvestris, Heterospina species   | 33 | 20 | 51 |
| 95.17075 | 32.68883 | zaduo    | Alpine sylvestris, Heterospina species   | 30 | 19 | 52 |
| 97.34619 | 33.40592 | chengduo | Alpine sylvestris, Heterospina species   | 18 | 15 | 42 |
| 95.83442 | 34.08278 | qumalai  | Alpine sylvestris, Heterospina species   | 43 | 22 | 45 |
| 97.34619 | 33.40592 | chengduo | Alpine sylvestris, Heterospina species   | 18 | 20 | 32 |
| 101.6117 | 35.92806 | guide    | Alpine sylvestris, Heterospina species   | 23 | 19 | 44 |
| 101.8363 | 35.77744 | jianzha  | Alpine sylvestris, Heterospina species   | 31 | 17 | 42 |
| 95.83442 | 34.08278 | qumalai  | Alpine sylvestris, Heterospina species   | 34 | 17 | 54 |
| 95.339   | 33.88797 | zhiduo   | Alpine sylvestris, Heterospina species   | 34 | 19 | 52 |
| 97.20311 | 33.34872 | chengduo | Alpine sylvestris, Heterospina species   | 33 | 21 | 47 |
| 97.34619 | 33.40592 | chengduo | Alpine sylvestris, Heterospina species   | 16 | 15 | 48 |
| 96.55958 | 32.88908 | yushu    | Alpine sylvestris, Heterospina species   | 36 | 19 | 51 |
| 94.99622 | 32.85094 | zaduo    | Alpine sylvestris, Heterospina species   | 35 | 22 | 46 |
| 94.98556 | 32.84819 | zaduo    | Alpine sylvestris, Heterospina species   | 35 | 22 | 48 |
| 94.99606 | 32.85114 | zaduo    | Alpine sylvestris, Heterospina species   | 35 | 22 | 46 |
| 96.75131 | 32.90194 | yushu    | Alpine sylvestris, Heterospina species   | 33 | 19 | 55 |
| 96.55961 | 32.88922 | yushu    | Alpine sylvestris, Heterospina species   | 36 | 19 | 51 |
| 95.58328 | 33.81972 | zhiduo   | Alpine sylvestris, Heterospina species   | 38 | 20 | 49 |
| 95.17903 | 32.66297 | zaduo    | Alpine sylvestris, Heterospina species   | 33 | 20 | 51 |
| 95.17075 | 32.68883 | zaduo    | Alpine sylvestris, Heterospina species   | 30 | 19 | 52 |
| 97.34619 | 33.40592 | chengduo | Alpine sylvestris, Heterospina species   | 22 | 14 | 44 |
| 95.17903 | 32.66297 | zaduo    | Alpine sylvestris, Heterospina species   | 18 | 20 | 32 |
| 96.18472 | 32.29881 | nangqian | Alpine pine grass, slender grass type    | 37 | 24 | 44 |
| 96.18475 | 32.29883 | nangqian | Alpine pine grass, slender grass type    | 37 | 24 | 44 |
| 96.18475 | 32.29883 | nangqian | Alpine pine grass, slender grass type    | 37 | 24 | 44 |
| 96.18475 | 32.29883 | nangqian | Alpine pine grass, slender grass type    | 37 | 24 | 32 |
| 96.18475 | 32.29883 | nangqian | Alpine pine grass, slender grass type    | 37 | 24 | 44 |
| 96.18475 | 32.29883 | nangqian | Alpine pine grass, slender grass type    | 37 | 24 | 44 |
| 96.18475 | 32.29883 | nangqian | Alpine pine grass, slender grass type    | 43 | 17 | 55 |
| 96.18475 | 32.29883 | nangqian | Alpine pine grass, slender grass type    | 45 | 19 | 48 |
| 96.18475 | 32.29883 | nangqian | Alpine pine grass, slender grass type    | 37 | 24 | 44 |
| 96.18475 | 32.29883 | nangqian | Alpine pine grass, slender grass type    | 37 | 24 | 44 |
| 96.18475 | 32.29883 | nangqian | Alpine pine grass, slender grass type    | 37 | 24 | 44 |
| 97.50028 | 34.0125  | chengduo | Alpine pine grass, dwarf pine grass type | 38 | 17 | 55 |

|          |          |          |                                              |    |    |    |
|----------|----------|----------|----------------------------------------------|----|----|----|
| 97.49944 | 34.01333 | chengduo | Alpine pine grass, dwarf pine grass type     | 38 | 17 | 55 |
| 97.50028 | 34.0125  | chengduo | Alpine pine grass, dwarf pine grass type     | 38 | 17 | 55 |
| 97.49944 | 34.01333 | chengduo | Alpine pine grass, dwarf pine grass type     | 38 | 17 | 55 |
| 97.50028 | 34.0125  | chengduo | Alpine pine grass, dwarf pine grass type     | 38 | 17 | 55 |
| 97.49944 | 34.01333 | chengduo | Alpine pine grass, dwarf pine grass type     | 38 | 17 | 55 |
| 97.50028 | 34.0125  | chengduo | Alpine pine grass, dwarf pine grass type     | 38 | 17 | 55 |
| 97.49944 | 34.01333 | chengduo | Alpine pine grass, dwarf pine grass type     | 38 | 17 | 55 |
| 97.50028 | 34.0125  | chengduo | Alpine pine grass, dwarf pine grass type     | 38 | 17 | 55 |
| 97.49944 | 34.01333 | chengduo | Alpine pine grass, dwarf pine grass type     | 38 | 17 | 55 |
| 97.50028 | 34.0125  | chengduo | Alpine pine grass, dwarf pine grass type     | 38 | 17 | 55 |
| 97.49944 | 34.01333 | chengduo | Alpine pine grass, dwarf pine grass type     | 38 | 17 | 55 |
| 97.50028 | 34.0125  | chengduo | Alpine pine grass, dwarf pine grass type     | 38 | 17 | 55 |
| 97.49944 | 34.01333 | chengduo | Alpine pine grass, dwarf pine grass type     | 38 | 17 | 55 |
| 97.50028 | 34.0125  | chengduo | Alpine pine grass, dwarf pine grass type     | 38 | 17 | 55 |
| 97.49944 | 34.01333 | chengduo | Alpine pine grass, dwarf pine grass type     | 38 | 17 | 55 |
| 100.9839 | 35.79156 | guinan   | Stipa brevis                                 | 15 | 6  | 80 |
| 100.0759 | 35.46667 | xinghai  | Stipa brevis, Qinghai sand-fixing grass type | 19 | 17 | 43 |
| 99.93519 | 35.66128 | xinghai  | Stipa brevis, Qinghai sand-fixing grass type | 25 | 17 | 47 |
| 100.0759 | 35.46667 | xinghai  | Stipa brevis, Qinghai sand-fixing grass type | 46 | 18 | 48 |
| 100.1124 | 35.93797 | xinghai  | Stipa brevis, Qinghai sand-fixing grass type | 18 | 17 | 44 |
| 100.1124 | 35.93797 | xinghai  | Stipa brevis, Qinghai sand-fixing grass type | 20 | 18 | 41 |
| 100.1124 | 35.93797 | xinghai  | Stipa brevis, Qinghai sand-fixing grass type | 18 | 17 | 44 |
| 100.1139 | 35.93878 | xinghai  | Stipa brevis, Qinghai sand-fixing grass type | 18 | 17 | 44 |
| 100.0881 | 35.92586 | xinghai  | Stipa brevis, Qinghai sand-fixing grass type | 17 | 17 | 43 |
| 100.0883 | 35.92556 | xinghai  | Stipa brevis, Qinghai sand-fixing grass type | 18 | 17 | 43 |
| 100.0955 | 35.427   | xinghai  | Stipa brevis, Qinghai sand-fixing grass type | 16 | 17 | 44 |
| 100.1784 | 35.28333 | xinghai  | Stipa brevis, Qinghai sand-fixing grass type | 16 | 19 | 41 |
| 99.93519 | 35.66128 | xinghai  | Stipa brevis, Qinghai sand-fixing grass type | 25 | 17 | 47 |
| 100.0955 | 35.427   | xinghai  | Stipa brevis, Qinghai sand-fixing grass type | 16 | 17 | 44 |
| 100.1784 | 35.28333 | xinghai  | Stipa brevis, Qinghai sand-fixing grass type | 16 | 19 | 41 |
| 100.089  | 35.93781 | xinghai  | Stipa brevis, Qinghai sand-fixing grass type | 19 | 17 | 43 |
| 99.93519 | 35.66128 | xinghai  | Stipa brevis, Qinghai sand-fixing grass type | 25 | 17 | 47 |
| 100.1161 | 35.93597 | xinghai  | Stipa brevis, Qinghai sand-fixing grass type | 17 | 18 | 44 |
| 100.0881 | 35.92586 | xinghai  | Stipa brevis, Qinghai sand-fixing grass type | 17 | 17 | 43 |
| 100.1124 | 35.93797 | xinghai  | Stipa brevis, Qinghai sand-fixing grass type | 18 | 17 | 44 |
| 100.0759 | 35.46667 | xinghai  | Stipa brevis, Qinghai sand-fixing grass type | 19 | 17 | 40 |
| 100.1814 | 35.28514 | xinghai  | Stipa brevis, Qinghai sand-fixing grass type | 16 | 19 | 41 |
| 100.089  | 35.93781 | xinghai  | Stipa brevis, Qinghai sand-fixing grass type | 19 | 17 | 40 |
| 99.93519 | 35.66128 | xinghai  | Stipa brevis, Qinghai sand-fixing grass type | 25 | 17 | 36 |
| 100.0881 | 35.92586 | xinghai  | Stipa brevis, Qinghai sand-fixing grass type | 17 | 17 | 40 |
| 100.089  | 35.93781 | xinghai  | Stipa brevis, Qinghai sand-fixing grass type | 38 | 20 | 49 |
| 100.1161 | 35.93597 | xinghai  | Stipa brevis, Qinghai sand-fixing grass type | 17 | 18 | 38 |
| 100.0759 | 35.46667 | xinghai  | Stipa brevis, Qinghai sand-fixing grass type | 19 | 17 | 43 |
| 100.1814 | 35.28514 | xinghai  | Stipa brevis, Qinghai sand-fixing grass type | 16 | 19 | 40 |

[illegible]

|          |          |         |                                              |    |    |    |
|----------|----------|---------|----------------------------------------------|----|----|----|
| 100.0881 | 35.92586 | xinghai | Stipa brevis, Qinghai sand-fixing grass type | 17 | 17 | 43 |
| 100.1161 | 35.93597 | xinghai | Stipa brevis, Qinghai sand-fixing grass type | 17 | 18 | 44 |
| 100.089  | 35.93781 | xinghai | Stipa brevis, Qinghai sand-fixing grass type | 46 | 18 | 48 |
| 101.8682 | 35.21703 | zeku    | Elysee weed                                  | 25 | 17 | 42 |
| 100.6968 | 34.07575 | gande   | Elysee weed                                  | 27 | 17 | 46 |
| 97.91517 | 35.07525 | maduo   | Elysee weed                                  | 33 | 17 | 54 |
| 97.91517 | 35.07525 | maduo   | Elysee weed                                  | 33 | 17 | 54 |
| 99.71778 | 33.72694 | dari    | Elysee weed                                  | 43 | 20 | 46 |
| 100.6968 | 34.07575 | gande   | Elysee weed                                  | 27 | 17 | 46 |
| 101.8682 | 35.21547 | zeku    | Elysee weed                                  | 26 | 17 | 41 |
| 101.8682 | 35.21703 | zeku    | Elysee weed                                  | 25 | 17 | 40 |
| 97.91517 | 35.07525 | maduo   | Elysee weed                                  | 33 | 17 | 29 |
| 100.6968 | 34.07575 | gande   | Elysee weed                                  | 27 | 17 | 36 |
| 101.8682 | 35.21547 | zeku    | Elysee weed                                  | 26 | 17 | 42 |
| 100.6968 | 34.07575 | gande   | Elysee weed                                  | 27 | 17 | 46 |
| 100.6968 | 34.07575 | gande   | Elysee weed                                  | 22 | 14 | 44 |
| 101.8682 | 35.21703 | zeku    | Elysee weed                                  | 25 | 17 | 42 |
| 100.3006 | 32.81056 | banma   | Elysee weed                                  | 43 | 20 | 49 |
| 101.8682 | 35.21547 | zeku    | Elysee weed                                  | 26 | 17 | 42 |
| 100.6968 | 34.07575 | gande   | Elysee weed                                  | 27 | 17 | 46 |
| 100.5947 | 32.84083 | banma   | Elysee weed                                  | 43 | 20 | 50 |
| 100.3006 | 32.81056 | banma   | Elysee weed                                  | 43 | 20 | 49 |
| 100.5947 | 32.84083 | banma   | Elysee weed                                  | 25 | 17 | 42 |
| 101.8704 | 35.20139 | zeku    | Elysee weed                                  | 27 | 19 | 42 |
| 97.91517 | 35.07525 | maduo   | Elysee weed                                  | 33 | 17 | 54 |
| 100.6968 | 34.07575 | gande   | Elysee weed                                  | 27 | 17 | 46 |
| 100.5947 | 32.84083 | banma   | Elysee weed                                  | 43 | 20 | 50 |
| 100.3006 | 32.81056 | banma   | Elysee weed                                  | 43 | 20 | 49 |
| 101.8682 | 35.21703 | zeku    | Elysee weed                                  | 25 | 17 | 42 |
| 100.3512 | 34.42458 | maqin   | Elysee weed                                  | 24 | 17 | 46 |
| 101.8704 | 35.20139 | zeku    | Elysee weed                                  | 27 | 19 | 42 |
| 97.91517 | 35.07525 | maduo   | Elysee weed                                  | 33 | 17 | 54 |
| 100.6968 | 34.07575 | gande   | Elysee weed                                  | 27 | 17 | 46 |
| 100.5947 | 32.84083 | banma   | Elysee weed                                  | 43 | 20 | 50 |
| 100.3006 | 32.81056 | banma   | Elysee weed                                  | 43 | 20 | 49 |
| 100.5947 | 32.84083 | banma   | Elysee weed                                  | 34 | 21 | 32 |
| 101.8682 | 35.21703 | zeku    | Elysee weed                                  | 25 | 17 | 42 |
| 100.3512 | 34.42458 | maqin   | Elysee weed                                  | 24 | 17 | 46 |
| 101.8682 | 35.21703 | zeku    | Elysee weed                                  | 25 | 17 | 42 |
| 100.6968 | 34.07575 | gande   | Elysee weed                                  | 27 | 17 | 46 |
| 100.5947 | 32.84083 | banma   | Elysee weed                                  | 43 | 20 | 50 |
| 100.3006 | 32.81056 | banma   | Elysee weed                                  | 43 | 20 | 49 |
| 101.8704 | 35.20139 | zeku    | Elysee weed                                  | 27 | 19 | 42 |
| 100.3512 | 34.42458 | maqin   | Elysee weed                                  | 24 | 17 | 46 |

|          |          |          |                    |    |    |    |
|----------|----------|----------|--------------------|----|----|----|
| 97.91517 | 35.07525 | maduo    | Elysee weed        | 33 | 17 | 54 |
| 100.3006 | 32.81056 | banma    | Elysee weed        | 36 | 19 | 51 |
| 101.8682 | 35.21703 | zeku     | Elysee weed        | 25 | 17 | 42 |
| 101.8704 | 35.20139 | zeku     | Elysee weed        | 27 | 19 | 42 |
| 100.3512 | 34.42458 | maqin    | Elysee weed        | 24 | 17 | 46 |
| 97.91517 | 35.07525 | maduo    | Elysee weed        | 33 | 17 | 54 |
| 100.5947 | 32.84083 | banma    | Elysee weed        | 43 | 20 | 50 |
| 100.3006 | 32.81056 | banma    | Elysee weed        | 43 | 20 | 49 |
| 101.8704 | 35.20139 | zeku     | Elysee weed        | 27 | 19 | 42 |
| 100.3512 | 34.42458 | maqin    | Elysee weed        | 24 | 17 | 46 |
| 97.91517 | 35.07525 | maduo    | Elysee weed        | 33 | 17 | 54 |
| 100.6968 | 34.07575 | gande    | Elysee weed        | 27 | 17 | 46 |
| 100.5947 | 32.84083 | banma    | Elysee weed        | 43 | 20 | 50 |
| 100.3006 | 32.81056 | banma    | Elysee weed        | 43 | 20 | 49 |
| 101.6953 | 35.02686 | zeku     | Tibetan grass type | 18 | 18 | 42 |
| 97.61028 | 34.07556 | chengduo | Tibetan grass type | 40 | 17 | 54 |
| 95.13731 | 34.09306 | zhiduo   | Tibetan grass type | 45 | 18 | 50 |
| 99.53025 | 34.89619 | maqin    | Tibetan grass type | 55 | 13 | 58 |
| 95.00781 | 34.24344 | zhiduo   | Tibetan grass type | 22 | 14 | 44 |
| 97.14006 | 33.80611 | chengduo | Tibetan grass type | 19 | 14 | 46 |
| 95.275   | 32.90178 | zaduo    | Tibetan grass type | 36 | 23 | 45 |
| 97.15372 | 33.84781 | chengduo | Tibetan grass type | 31 | 18 | 51 |
| 97.15278 | 33.84781 | chengduo | Tibetan grass type | 31 | 18 | 51 |
| 96.09108 | 32.32944 | nangqian | Tibetan grass type | 30 | 20 | 43 |
| 96.09006 | 32.33014 | nangqian | Tibetan grass type | 34 | 21 | 45 |
| 97.61028 | 34.07556 | chengduo | Tibetan grass type | 43 | 21 | 49 |
| 100.2274 | 34.48497 | maqin    | Tibetan grass type | 25 | 19 | 42 |
| 95.00806 | 34.24333 | zhiduo   | Tibetan grass type | 22 | 14 | 44 |
| 97.33361 | 33.37189 | chengduo | Tibetan grass type | 19 | 15 | 45 |
| 95.275   | 32.90178 | zaduo    | Tibetan grass type | 22 | 14 | 44 |
| 97.61028 | 34.07556 | chengduo | Tibetan grass type | 40 | 17 | 54 |
| 99.53025 | 34.89619 | maqin    | Tibetan grass type | 55 | 13 | 58 |
| 95.00781 | 34.24344 | zhiduo   | Tibetan grass type | 22 | 14 | 44 |
| 99.18522 | 34.48178 | maqin    | Tibetan grass type | 46 | 18 | 48 |
| 95.27431 | 32.90206 | zaduo    | Tibetan grass type | 36 | 23 | 45 |
| 97.15372 | 33.84781 | chengduo | Tibetan grass type | 31 | 18 | 51 |
| 97.15278 | 33.84781 | chengduo | Tibetan grass type | 31 | 18 | 51 |
| 97.33361 | 33.37189 | chengduo | Tibetan grass type | 19 | 15 | 45 |
| 96.09108 | 32.32944 | nangqian | Tibetan grass type | 30 | 20 | 43 |
| 96.09042 | 32.33008 | nangqian | Tibetan grass type | 34 | 21 | 45 |
| 100.2274 | 34.48497 | maqin    | Tibetan grass type | 40 | 20 | 49 |
| 100.2274 | 34.48497 | maqin    | Tibetan grass type | 25 | 19 | 42 |
| 97.14006 | 33.80611 | chengduo | Tibetan grass type | 19 | 14 | 46 |
| 100.2274 | 34.48497 | maqin    | Tibetan grass type | 25 | 19 | 42 |

|          |          |          |                    |    |    |    |
|----------|----------|----------|--------------------|----|----|----|
| 100.0631 | 34.52242 | maqin    | Tibetan grass type | 40 | 21 | 50 |
| 101.6953 | 35.02686 | zeku     | Tibetan grass type | 18 | 18 | 42 |
| 95.13731 | 34.09306 | zhiduo   | Tibetan grass type | 45 | 18 | 50 |
| 99.53025 | 34.89619 | maqin    | Tibetan grass type | 55 | 13 | 58 |
| 99.18525 | 34.48178 | maqin    | Tibetan grass type | 46 | 18 | 48 |
| 95.00828 | 34.24358 | zhiduo   | Tibetan grass type | 22 | 14 | 45 |
| 99.18522 | 34.48178 | maqin    | Tibetan grass type | 46 | 18 | 48 |
| 95.27431 | 32.90206 | zaduo    | Tibetan grass type | 36 | 23 | 45 |
| 96.09108 | 32.32944 | nangqian | Tibetan grass type | 30 | 20 | 43 |
| 100.0631 | 34.52242 | maqin    | Tibetan grass type | 35 | 21 | 45 |
| 97.15278 | 33.84781 | chengduo | Tibetan grass type | 34 | 17 | 56 |
| 99.18611 | 34.48211 | maqin    | Tibetan grass type | 47 | 19 | 47 |
| 97.61028 | 34.07556 | chengduo | Tibetan grass type | 40 | 17 | 54 |
| 97.15278 | 33.84781 | chengduo | Tibetan grass type | 31 | 18 | 51 |
| 96.09042 | 32.33008 | nangqian | Tibetan grass type | 34 | 21 | 45 |
| 99.18611 | 34.48211 | maqin    | Tibetan grass type | 47 | 19 | 35 |
| 100.2273 | 34.48497 | maqin    | Tibetan grass type | 25 | 19 | 39 |
| 100.0631 | 34.52242 | maqin    | Tibetan grass type | 40 | 21 | 30 |
| 101.6953 | 35.02686 | zeku     | Tibetan grass type | 18 | 18 | 40 |
| 95.13731 | 34.09306 | zhiduo   | Tibetan grass type | 45 | 18 | 32 |
| 97.61028 | 34.07556 | chengduo | Tibetan grass type | 40 | 17 | 30 |
| 99.53028 | 34.91286 | maqin    | Tibetan grass type | 62 | 15 | 28 |
| 99.18525 | 34.48178 | maqin    | Tibetan grass type | 46 | 18 | 34 |
| 95.00806 | 34.24344 | zhiduo   | Tibetan grass type | 22 | 14 | 41 |
| 95.00828 | 34.24358 | zhiduo   | Tibetan grass type | 22 | 14 | 41 |
| 99.18522 | 34.48178 | maqin    | Tibetan grass type | 46 | 18 | 34 |
| 95.27431 | 32.90206 | zaduo    | Tibetan grass type | 36 | 23 | 32 |
| 97.15372 | 33.84781 | chengduo | Tibetan grass type | 31 | 18 | 31 |
| 97.15278 | 33.84781 | chengduo | Tibetan grass type | 31 | 18 | 31 |
| 95.13731 | 34.09306 | zhiduo   | Tibetan grass type | 22 | 14 | 41 |
| 97.14006 | 33.80611 | chengduo | Tibetan grass type | 19 | 14 | 40 |
| 96.09108 | 32.32944 | nangqian | Tibetan grass type | 30 | 20 | 35 |
| 96.09042 | 32.33008 | nangqian | Tibetan grass type | 34 | 21 | 33 |
| 99.18611 | 34.48211 | maqin    | Tibetan grass type | 47 | 19 | 47 |
| 100.2273 | 34.48497 | maqin    | Tibetan grass type | 25 | 19 | 42 |
| 101.6953 | 35.02686 | zeku     | Tibetan grass type | 18 | 18 | 42 |
| 97.61028 | 34.07556 | chengduo | Tibetan grass type | 40 | 17 | 54 |
| 95.00806 | 34.24344 | zhiduo   | Tibetan grass type | 22 | 14 | 44 |
| 99.18522 | 34.48178 | maqin    | Tibetan grass type | 46 | 18 | 48 |
| 97.15278 | 33.84781 | chengduo | Tibetan grass type | 31 | 18 | 51 |
| 97.33361 | 33.37189 | chengduo | Tibetan grass type | 19 | 15 | 45 |
| 97.33361 | 33.37189 | chengduo | Tibetan grass type | 18 | 15 | 46 |
| 96.09042 | 32.33008 | nangqian | Tibetan grass type | 34 | 21 | 45 |
| 100.0631 | 34.52242 | maqin    | Tibetan grass type | 40 | 21 | 50 |



|          |          |          |                    |    |    |    |
|----------|----------|----------|--------------------|----|----|----|
| 99.53028 | 34.91286 | maqin    | Tibetan grass type | 62 | 15 | 57 |
| 95.00781 | 34.24344 | zhiduo   | Tibetan grass type | 22 | 14 | 44 |
| 97.15372 | 33.84781 | chengduo | Tibetan grass type | 31 | 18 | 51 |
| 96.09108 | 32.32944 | nangqian | Tibetan grass type | 30 | 20 | 43 |
| 100.2273 | 34.48497 | maqin    | Tibetan grass type | 25 | 19 | 42 |
| 100.0631 | 34.52242 | maqin    | Tibetan grass type | 40 | 21 | 50 |
| 97.61028 | 34.07556 | chengduo | Tibetan grass type | 40 | 17 | 54 |
| 99.53028 | 34.91286 | maqin    | Tibetan grass type | 62 | 15 | 57 |
| 95.00806 | 34.24344 | zhiduo   | Tibetan grass type | 22 | 14 | 44 |
| 95.27431 | 32.90206 | zaduo    | Tibetan grass type | 36 | 23 | 45 |
| 97.33361 | 33.37189 | chengduo | Tibetan grass type | 19 | 15 | 45 |
| 96.09108 | 32.32944 | nangqian | Tibetan grass type | 30 | 20 | 43 |
| 95.13731 | 34.09306 | zhiduo   | Tibetan grass type | 46 | 18 | 48 |
| 99.18611 | 34.48211 | maqin    | Tibetan grass type | 47 | 19 | 47 |
| 95.13731 | 34.09306 | zhiduo   | Tibetan grass type | 45 | 18 | 50 |
| 99.18525 | 34.48178 | maqin    | Tibetan grass type | 46 | 18 | 48 |
| 95.00781 | 34.24344 | zhiduo   | Tibetan grass type | 22 | 14 | 44 |
| 99.18522 | 34.48178 | maqin    | Tibetan grass type | 46 | 18 | 48 |
| 97.15372 | 33.84781 | chengduo | Tibetan grass type | 31 | 18 | 51 |
| 97.33361 | 33.37189 | chengduo | Tibetan grass type | 45 | 20 | 46 |
| 100.2273 | 34.48497 | maqin    | Tibetan grass type | 23 | 19 | 41 |
| 99.18611 | 34.48211 | maqin    | Tibetan grass type | 47 | 19 | 47 |
| 100.0631 | 34.52242 | maqin    | Tibetan grass type | 40 | 21 | 50 |
| 95.13731 | 34.09306 | zhiduo   | Tibetan grass type | 45 | 18 | 50 |
| 97.61028 | 34.07556 | chengduo | Tibetan grass type | 40 | 17 | 54 |
| 99.53028 | 34.91286 | maqin    | Tibetan grass type | 62 | 15 | 57 |
| 99.18525 | 34.48178 | maqin    | Tibetan grass type | 46 | 18 | 48 |
| 95.00781 | 34.24344 | zhiduo   | Tibetan grass type | 22 | 14 | 44 |
| 95.27431 | 32.90206 | zaduo    | Tibetan grass type | 36 | 23 | 45 |
| 97.14006 | 33.80611 | chengduo | Tibetan grass type | 19 | 14 | 46 |
| 97.15278 | 33.84781 | chengduo | Tibetan grass type | 31 | 18 | 51 |
| 97.33361 | 33.37189 | chengduo | Tibetan grass type | 19 | 15 | 45 |
| 96.09108 | 32.32944 | nangqian | Tibetan grass type | 30 | 20 | 43 |
| 96.09042 | 32.33008 | nangqian | Tibetan grass type | 34 | 21 | 45 |
| 100.2273 | 34.48497 | maqin    | Tibetan grass type | 25 | 19 | 42 |
| 97.61028 | 34.07556 | chengduo | Tibetan grass type | 18 | 15 | 42 |
| 99.18525 | 34.48178 | maqin    | Tibetan grass type | 46 | 18 | 48 |
| 95.13731 | 34.09306 | zhiduo   | Tibetan grass type | 45 | 18 | 50 |
| 97.61028 | 34.07556 | chengduo | Tibetan grass type | 40 | 17 | 54 |
| 99.53028 | 34.91286 | maqin    | Tibetan grass type | 62 | 15 | 57 |
| 99.18525 | 34.48178 | maqin    | Tibetan grass type | 46 | 18 | 48 |
| 95.00828 | 34.24358 | zhiduo   | Tibetan grass type | 22 | 14 | 45 |
| 99.18522 | 34.48178 | maqin    | Tibetan grass type | 46 | 18 | 48 |
| 95.27431 | 32.90206 | zaduo    | Tibetan grass type | 36 | 23 | 45 |

|          |          |          |                    |    |    |    |
|----------|----------|----------|--------------------|----|----|----|
| 97.14006 | 33.80611 | chengduo | Tibetan grass type | 19 | 14 | 46 |
| 97.15372 | 33.84781 | chengduo | Tibetan grass type | 31 | 18 | 51 |
| 97.15278 | 33.84781 | chengduo | Tibetan grass type | 31 | 18 | 51 |
| 97.33361 | 33.37189 | chengduo | Tibetan grass type | 19 | 15 | 45 |
| 96.09108 | 32.32944 | nangqian | Tibetan grass type | 30 | 20 | 43 |
| 96.09042 | 32.33008 | nangqian | Tibetan grass type | 34 | 21 | 45 |
| 100.0631 | 34.52242 | maqin    | Tibetan grass type | 25 | 17 | 42 |
| 100.2273 | 34.48497 | maqin    | Tibetan grass type | 25 | 19 | 42 |
| 100.0631 | 34.52242 | maqin    | Tibetan grass type | 40 | 21 | 50 |
| 100.2273 | 34.48497 | maqin    | Tibetan grass type | 25 | 19 | 42 |
| 100.0631 | 34.52242 | maqin    | Tibetan grass type | 40 | 21 | 50 |
| 95.13731 | 34.09306 | zhiduo   | Tibetan grass type | 45 | 18 | 50 |
| 97.61028 | 34.07556 | chengduo | Tibetan grass type | 40 | 17 | 54 |
| 99.53028 | 34.91286 | maqin    | Tibetan grass type | 62 | 15 | 57 |
| 95.00806 | 34.24344 | zhiduo   | Tibetan grass type | 22 | 14 | 44 |
| 99.18522 | 34.48178 | maqin    | Tibetan grass type | 46 | 18 | 48 |
| 97.14006 | 33.80611 | chengduo | Tibetan grass type | 19 | 14 | 46 |
| 97.15372 | 33.84781 | chengduo | Tibetan grass type | 31 | 18 | 51 |
| 97.15278 | 33.84781 | chengduo | Tibetan grass type | 31 | 18 | 51 |
| 97.33361 | 33.37189 | chengduo | Tibetan grass type | 19 | 15 | 45 |
| 96.09042 | 32.33008 | nangqian | Tibetan grass type | 34 | 21 | 45 |
| 99.18611 | 34.48211 | maqin    | Tibetan grass type | 47 | 19 | 47 |
| 96.09108 | 32.32944 | nangqian | Tibetan grass type | 30 | 20 | 43 |
| 99.18611 | 34.48211 | maqin    | Tibetan grass type | 47 | 19 | 47 |
| 100.2273 | 34.48497 | maqin    | Tibetan grass type | 25 | 19 | 42 |
| 100.0631 | 34.52242 | maqin    | Tibetan grass type | 40 | 21 | 50 |
| 95.13731 | 34.09306 | zhiduo   | Tibetan grass type | 45 | 18 | 50 |
| 97.61028 | 34.07556 | chengduo | Tibetan grass type | 40 | 17 | 54 |
| 99.53028 | 34.91286 | maqin    | Tibetan grass type | 62 | 15 | 57 |
| 95.00806 | 34.24344 | zhiduo   | Tibetan grass type | 22 | 14 | 44 |
| 99.18522 | 34.48178 | maqin    | Tibetan grass type | 46 | 18 | 48 |
| 97.14006 | 33.80611 | chengduo | Tibetan grass type | 19 | 14 | 46 |
| 97.15372 | 33.84781 | chengduo | Tibetan grass type | 31 | 18 | 51 |
| 97.15278 | 33.84781 | chengduo | Tibetan grass type | 31 | 18 | 51 |
| 97.33361 | 33.37189 | chengduo | Tibetan grass type | 19 | 15 | 45 |
| 96.09108 | 32.32944 | nangqian | Tibetan grass type | 30 | 20 | 43 |
| 96.09042 | 32.33008 | nangqian | Tibetan grass type | 34 | 21 | 45 |
| 97.14006 | 33.80611 | chengduo | Tibetan grass type | 35 | 22 | 48 |
| 97.15278 | 33.84781 | chengduo | Tibetan grass type | 17 | 19 | 51 |
| 95.13731 | 34.09306 | zhiduo   | Tibetan grass type | 45 | 18 | 50 |
| 97.61028 | 34.07556 | chengduo | Tibetan grass type | 40 | 17 | 54 |
| 99.53028 | 34.91286 | maqin    | Tibetan grass type | 62 | 15 | 57 |
| 95.27431 | 32.90206 | zaduo    | Tibetan grass type | 36 | 23 | 45 |
| 97.14006 | 33.80611 | chengduo | Tibetan grass type | 19 | 14 | 46 |

|          |          |          |                    |    |    |    |
|----------|----------|----------|--------------------|----|----|----|
| 97.15372 | 33.84781 | chengduo | Tibetan grass type | 31 | 18 | 51 |
| 97.15278 | 33.84781 | chengduo | Tibetan grass type | 31 | 18 | 51 |
| 97.33361 | 33.37189 | chengduo | Tibetan grass type | 19 | 15 | 45 |
| 96.09108 | 32.32944 | nangqian | Tibetan grass type | 30 | 20 | 43 |
| 96.09042 | 32.33008 | nangqian | Tibetan grass type | 34 | 21 | 45 |
| 97.15372 | 33.84781 | chengduo | Tibetan grass type | 40 | 20 | 49 |
| 97.15278 | 33.84781 | chengduo | Tibetan grass type | 17 | 19 | 51 |
| 97.15278 | 33.84781 | chengduo | Tibetan grass type | 17 | 19 | 51 |
| 100.1674 | 33.39586 | dari     | Tibetan grass type | 41 | 20 | 47 |
| 99.18611 | 34.48211 | maqin    | dwarf grass type   | 47 | 19 | 47 |
| 97.19367 | 32.78675 | yushu    | dwarf grass type   | 36 | 18 | 49 |
| 97.12544 | 32.825   | yushu    | dwarf grass type   | 28 | 20 | 49 |
| 99.21908 | 34.22739 | maqin    | dwarf grass type   | 40 | 18 | 49 |
| 99.19778 | 34.49194 | maqin    | dwarf grass type   | 41 | 17 | 49 |
| 99.21908 | 34.22739 | maqin    | dwarf grass type   | 40 | 18 | 49 |
| 97.12544 | 32.825   | yushu    | dwarf grass type   | 28 | 20 | 49 |
| 99.21908 | 34.22739 | maqin    | dwarf grass type   | 40 | 18 | 49 |
| 97.19367 | 32.78675 | yushu    | dwarf grass type   | 36 | 18 | 49 |
| 97.12544 | 32.825   | yushu    | dwarf grass type   | 28 | 20 | 49 |
| 99.21908 | 34.22739 | maqin    | dwarf grass type   | 40 | 18 | 32 |
| 97.19367 | 32.78675 | yushu    | dwarf grass type   | 36 | 18 | 32 |
| 97.12544 | 32.825   | yushu    | dwarf grass type   | 28 | 20 | 30 |
| 99.21908 | 34.22739 | maqin    | dwarf grass type   | 40 | 18 | 49 |
| 97.12544 | 32.825   | yushu    | dwarf grass type   | 28 | 20 | 49 |
| 99.21908 | 34.22739 | maqin    | dwarf grass type   | 40 | 18 | 49 |
| 97.19367 | 32.78675 | yushu    | dwarf grass type   | 36 | 18 | 49 |
| 97.12544 | 32.825   | yushu    | dwarf grass type   | 28 | 20 | 49 |
| 97.19367 | 32.78675 | yushu    | dwarf grass type   | 36 | 18 | 49 |
| 97.12544 | 32.825   | yushu    | dwarf grass type   | 28 | 20 | 49 |
| 99.21908 | 34.22739 | maqin    | dwarf grass type   | 40 | 18 | 49 |
| 97.19367 | 32.78675 | yushu    | dwarf grass type   | 36 | 18 | 49 |
| 99.21908 | 34.22739 | maqin    | dwarf grass type   | 40 | 18 | 49 |
| 97.12544 | 32.825   | yushu    | dwarf grass type   | 28 | 20 | 49 |
| 99.21908 | 34.22739 | maqin    | dwarf grass type   | 40 | 18 | 49 |
| 97.19367 | 32.78675 | yushu    | dwarf grass type   | 36 | 18 | 49 |
| 97.12544 | 32.825   | yushu    | dwarf grass type   | 28 | 20 | 49 |
| 99.21908 | 34.22739 | maqin    | dwarf grass type   | 40 | 18 | 49 |
| 97.19367 | 32.78675 | yushu    | dwarf grass type   | 36 | 18 | 49 |
| 97.12544 | 32.825   | yushu    | dwarf grass type   | 28 | 20 | 49 |
| 99.21908 | 34.22739 | maqin    | dwarf grass type   | 40 | 18 | 49 |
| 97.19367 | 32.78675 | yushu    | dwarf grass type   | 36 | 18 | 49 |
| 97.12544 | 32.825   | yushu    | dwarf grass type   | 28 | 20 | 49 |
| 99.21908 | 34.22739 | maqin    | dwarf grass type   | 40 | 18 | 49 |
| 97.19367 | 32.78675 | yushu    | dwarf grass type   | 36 | 18 | 49 |
| 97.12544 | 32.825   | yushu    | dwarf grass type   | 28 | 20 | 49 |
| 101.1543 | 35.30367 | zeku     | dwarf grass type   | 20 | 19 | 35 |

Note:The soil data were from the global gridded soil information (<https://soilgrids.org/>).

**Table S2.** Distribution of collection points in each county in the TRHR from 2005 to 2015.

| <b>Year<br/>Location</b> | <b>2005</b> | <b>2006</b> | <b>2007</b> | <b>2008</b> | <b>2009</b> | <b>2010</b> | <b>2011</b> | <b>2012</b> | <b>2013</b> | <b>2014</b> | <b>2015</b> | <b>Sum</b> |
|--------------------------|-------------|-------------|-------------|-------------|-------------|-------------|-------------|-------------|-------------|-------------|-------------|------------|
| Banma                    | 7           | 10          | 10          | 10          | 11          | 12          | 12          | 12          | 12          | 12          | 12          | 120        |
| Chengduo                 | 7           | 10          | 2           | 5           | 11          | 10          | 10          | 11          | 12          | 12          | 12          | 102        |
| Dari                     | 6           | 6           | 6           | 7           | 7           | 9           | 9           | 7           | 7           | 7           | 7           | 78         |
| Gande                    | 1           | 6           | 5           | 6           | 6           | 6           | 6           | 6           | 6           | 6           | 6           | 60         |
| Geermu                   | 3           | 5           | 6           | 6           | 5           | 6           | 7           | 1           | 1           | 7           | 4           | 51         |
| Guide                    |             |             |             |             |             |             |             |             |             |             | 3           | 3          |
| Guinan                   |             |             |             |             |             |             |             |             |             |             | 3           | 3          |
| Henan                    | 5           | 7           | 6           | 9           | 10          | 9           | 10          | 9           | 7           |             | 10          | 82         |
| Jianzha                  |             |             |             |             |             |             |             |             |             |             | 5           | 5          |
| Jiuzhi                   | 8           | 11          | 11          | 11          | 11          | 11          | 11          | 10          | 10          | 9           | 9           | 112        |
| Maduo                    | 7           | 10          | 7           | 9           | 9           | 3           | 10          | 10          | 10          | 10          | 8           | 93         |
| Maqin                    | 6           | 7           | 9           | 9           | 9           | 9           | 10          | 9           | 10          | 10          | 8           | 96         |
| Nangqian                 | 7           | 11          | 11          | 11          | 11          | 9           | 6           | 9           | 9           | 8           | 9           | 101        |
| Qumalai                  | 5           | 11          | 11          | 11          | 10          | 8           | 10          | 11          | 11          | 9           | 11          | 108        |
| Tongde                   | 7           | 8           | 9           | 11          | 11          | 11          | 12          | 12          | 12          | 11          | 11          | 115        |
| Tongren                  |             |             |             |             |             |             |             |             |             |             | 2           | 2          |
| Xinghai                  | 5           | 8           | 8           | 8           | 8           | 8           | 8           | 6           | 8           | 8           | 9           | 84         |
| Yushu                    | 5           | 9           | 11          | 11          | 9           | 9           | 11          | 11          | 11          | 11          | 7           | 105        |
| Zaduo                    | 5           | 11          | 10          | 10          | 9           | 9           | 10          | 8           | 9           | 9           | 10          | 100        |
| Zeku                     | 5           | 8           | 10          | 10          | 10          | 10          | 9           | 9           | 9           | 7           | 7           | 94         |
| Zhiduo                   | 6           | 7           | 10          | 10          | 10          | 10          | 11          | 12          | 10          | 10          | 10          | 106        |
| Sum                      | 95          | 145         | 142         | 154         | 157         | 149         | 162         | 153         | 154         | 146         | 163         | 1620       |

**Table S3.** Calculation of various indices of MODIS.

| <b>Name</b>                                         | <b>Abbreviation</b> | <b>Formula</b>                                              | <b>Reference</b> |
|-----------------------------------------------------|---------------------|-------------------------------------------------------------|------------------|
| <b>Soil-adjusted vegetation index</b>               | SAVI                | $\frac{NIR - R}{NIR + R + L} (1 + L)$                       | [1]              |
| <b>Modified soil-adjusted vegetation index</b>      | MSAVI               | $\frac{2NIR + 1 - \sqrt{(2NIR + 1)^2 - 8(NIR - R)}}{2}$     | [2]              |
| <b>Optimized soil-adjusted vegetation index</b>     | OSAVI               | $\frac{NIR - R}{NIR + R + 0.16}$                            | [3]              |
| <b>Soil adjusted total vegetation index</b>         | SATVI               | $\frac{SWIR1 + R}{SWIR1 + R + L} (1 + L) - \frac{SWIR2}{2}$ | [4]              |
| <b>Ratio vegetation index</b>                       | RVI                 | $\frac{SWIR2}{SWIR1}$                                       | [5]              |
| <b>Difference vegetation index</b>                  | DVI                 | $NIR - R$                                                   | [6]              |
| <b>Normalized difference soil index</b>             | NDSI                | $\frac{SWIR2 - Green}{SWIR2 + Green}$                       | [7]              |
| <b>Normalized difference water index</b>            | NDWI                | $\frac{Green - NIR}{Green + NIR}$                           | [8]              |
| <b>Brightness index</b>                             | BI                  | $\sqrt{R^2 + NIR^2}$                                        | [9]              |
| <b>Transformed vegetation index</b>                 | TVI                 | $\sqrt{NDVI + 0.5}$                                         | [10]             |
| <b>Normalized difference vegetation green index</b> | NDVGI               | $\frac{(NIR - Green)}{(NIR + Green)}$                       | [11]             |
| <b>Soil color index</b>                             | SCI                 | $3NIR + R - Green - 3Blue$                                  | [12]             |
| <b>band index</b>                                   | C                   | $\frac{Band2 - Band7}{Band5}$                               | [13]             |
| <b>band index</b>                                   | D                   | $\frac{Band2}{(Band5 - Band7)}$                             | [13]             |
| <b>band index</b>                                   | E                   | $\frac{(Band5 - Band7)}{(Band5 + Band7)}$                   | [13]             |
| <b>band index</b>                                   | F                   | $\frac{Band7}{Band2}$                                       | [13]             |
| <b>band index</b>                                   | G                   | $\frac{Band7}{Band5}$                                       | [13]             |

Note: NIR represents the near-infrared band (band 2 of MODIS); R represents the red band (band 1 of MODIS); Blue represents the blue band (band 3 of MODIS), and Green represents the green band (band 4 of MODIS).  $L = 0.5$ ; in the SATVI equation, NDSI equation, and RVI equations; SWIR1 represents the short-wave infrared band (band 6 of MODIS), and SWIR2 represents the mid-infrared band (band 7 of MODIS).

**Table S4.** Correlation between grassland AGB and environmental factors.

| AGB                   |           |                         | AGB                    |           |                         |
|-----------------------|-----------|-------------------------|------------------------|-----------|-------------------------|
| variable type         | variables | Correlation coefficient | variable type          | variables | Correlation coefficient |
| topographical factors | Aspect    | -0.01**                 | MODIS factors          | G         | -0.4**                  |
|                       | DEM       | -0.18**                 |                        | BI        | 0.19**                  |
|                       | Slope     | 0.29                    |                        | DVI       | 0.49**                  |
|                       | BLD       | -0.21**                 |                        | EVI       | 0.5**                   |
|                       | CEC       | 0.11**                  |                        | Fpar      | 0.48**                  |
| soil factors          | CL        | 0.26**                  |                        | LAI       | 0.47**                  |
|                       | CR        | 0.14**                  |                        | MSAVI     | 0.51**                  |
|                       | OC        | 0.1**                   |                        | NDSI      | -0.4**                  |
|                       | OR        | 0.14**                  |                        | NDVGI     | 0.5**                   |
|                       | pH        | -0.14**                 |                        | NDVI      | 0.51**                  |
| MODIS factors         | SL        | 0.09**                  |                        | NDWI      | -0.05**                 |
|                       | SN        | -0.17**                 |                        | OSAVI     | 0.51**                  |
|                       | B1        | -0.38**                 |                        | RVI       | -0.31**                 |
|                       | B2        | 0.39**                  |                        | SATVI     | 0.03**                  |
|                       | B3        | -0.19**                 |                        | SAVI      | 0.51**                  |
|                       | B4        | -0.23**                 |                        | SCI       | 0.44**                  |
|                       | B5        | 0.3**                   |                        | TVI       | 0.5**                   |
|                       | B6        | -0.25**                 |                        | D-LST     | -0.17**                 |
|                       | B7        | -0.44**                 |                        | N-LST     | 0.01**                  |
|                       | C         | 0.47**                  | meteorological factors | AMT       | 0.2**                   |
|                       | D         | 0.46**                  |                        | GDD       | -0.29**                 |
|                       | E         | 0.5**                   |                        | AMP       | 0.43**                  |
|                       | F         | -0.43**                 |                        |           |                         |

Note: DEM refers to the Digital Elevation Model; BLD represents bulk density; CEC represents cation exchange capacity (at pH = 7); CL refers to clay content; SN represents sand; SL refers to silt size; OR refers to organic carbon density; OC represents soil organic carbon stock; CR represents coarse fragments; B1--B7 refer to the reflectance of the MODIS band 1--band 7; C--G represent 5 band indices (Band 2--Band 7 (C), Band 5/Band 2 (D), (Band 5--Band 7)/(Band 5+Band 7) (E), Band 7/Band 2 (F), Band 7/Band 5 (G)); BI represents the brightness index; DVI refers to the difference vegetation index; EVI represents the enhanced vegetation index; Fpar refers to the fraction of photosynthetically active radiation; LAI represents leaf area index; MSAVI represents the modified soil-adjusted vegetation index; NDSI refers to the normalized difference soil index; NDVGI represents the normalized difference vegetation green index; NDVI represents the normalized difference vegetative index; NDWI refers to the normalized difference water index; OSAVI represents the optimized soil-adjusted vegetation index; RVI refers to the ratio vegetation index; SATVI represents the soil-adjusted total vegetation index; SAVI refers to the soil-adjusted vegetation index; SCI represents the soil color index; TVI represents the transformed vegetation index; D-LST refers to the day land surface temperature, N-LST represents the night land surface

temperature AMT represents annual mean temperature; GDD refers to growing degree days, and AMP represents annual mean precipitation. \*\* statistically significant.

Table S5. Predicted AGB and precipitation

| Year | Predicted AGB(kg DW/ha) | precipitation (mm) | Predicted AGB(kg DW/ha) | precipitation (mm) | Predicted AGB(kg DW/ha) | precipitation (mm) |
|------|-------------------------|--------------------|-------------------------|--------------------|-------------------------|--------------------|
| 2005 | 1494.738224             | 519.3707275        | 3013.599919             | 655.6619263        | 640.4796593             | 391.2131348        |
|      | 1535.798812             | 506.1049194        | 3202.801209             | 650.8483276        | 2829.255163             | 635.5668945        |
|      | 1158.690646             | 474.2471008        | 3715.879661             | 778.8861694        | 2812.086959             | 498.8676758        |
|      | 1953.324206             | 487.3322449        | 3310.122063             | 892.0031738        | 995.3893211             | 383.9246216        |
|      | 3329.409711             | 535.7970581        | 3169.15064              | 793.4832764        | 701.1269462             | 379.9997253        |
|      | 3616.491231             | 568.2841187        | 3827.042184             | 684.739502         | 1232.160749             | 463.5880432        |
|      | 1385.948097             | 491.2850037        | 4175.382185             | 749.3685913        | 3245.599594             | 795.760376         |
|      | 2479.209631             | 541.7327881        | 2343.272626             | 652.0726318        | 3697.554933             | 756.9298096        |
|      | 1483.831623             | 517.0739136        | 2835.809614             | 606.1546021        | 3264.223716             | 580.2561646        |
|      | 1958.439261             | 585.8856812        | 4505.66821              | 651.1738892        | 3176.057064             | 631.4889526        |
|      | 3485.709633             | 580.4309082        | 3071.540474             | 601.4497681        | 3574.141231             | 683.3186035        |
|      | 701.1269462             | 379.9997253        | 2571.97171              | 684.5670166        | 2827.865914             | 643.3189697        |
|      | 4810.510734             | 638.3847046        | 3453.932575             | 684.739502         | 3300.310026             | 593.0283203        |
|      | 4224.588933             | 664.9625244        | 2926.781382             | 692.4810791        | 3575.451664             | 630.1296997        |
|      | 4096.918733             | 660.3842163        | 4024.785689             | 771.6637573        | 3123.634694             | 580.5592041        |
|      | 3310.56275              | 599.9961548        | 1578.463998             | 369.5026245        | 3090.356289             | 529.6330566        |
|      | 876.9346891             | 413.4503784        | 4294.380468             | 623.2424927        | 1349.059177             | 521.0136108        |
|      | 701.0553272             | 409.7695618        | 2427.02689              | 653.0394287        | 2889.685771             | 575.409668         |
|      | 508.73923               | 394.7159119        | 3271.209993             | 594.7550049        | 2891.832057             | 575.0496216        |
|      | 3946.222931             | 513.3067627        | 2345.962389             | 553.6801147        | 2663.293795             | 699.5179443        |
|      | 2070.992131             | 482.4248352        | 1111.186231             | 600.5822754        | 3042.345064             | 738.2340088        |
|      | 3610.463714             | 625.1134644        | 2920.135609             | 617.7449951        | 2964.242015             | 738.2340088        |
|      | 3009.070826             | 533.4439697        | 2717.98891              | 467.5601501        | 3533.81164              | 821.8478394        |
|      | 1907.89748              | 504.6472473        | 2409.112121             | 545.8370972        | 2729.441905             | 876.8806763        |
|      | 3641.272905             | 522.2016602        | 4514.545858             | 652.4604492        | 3774.37288              | 856.4593506        |
|      | 3571.428966             | 532.5932617        | 2812.086959             | 498.8676758        | 4172.537306             | 891.8583984        |
|      | 3596.023007             | 568.2841187        | 2351.486506             | 590.637146         | 4231.359511             | 792.7633057        |
|      | 1308.836687             | 442.5464783        | 2410.013852             | 586.7485962        | 2486.995753             | 614.9595337        |
|      | 1833.880498             | 398.5360718        | 3672.271376             | 856.6133423        | 2829.92901              | 697.5712891        |
|      | 1587.787963             | 395.9150391        | 4278.251034             | 853.4588013        | 4697.590173             | 540.2008057        |
|      | 3500.034085             | 601.4552612        | 3282.493543             | 572.701416         | 709.308094              | 432.9007263        |
|      | 4488.454928             | 599.404541         | 2230.631823             | 548.5800171        | 2635.06499              | 514.6835327        |
|      | 1989.211489             | 607.6919556        | 3315.765864             | 602.2575684        | 3534.510561             | 730.6923218        |
|      | 2191.797431             | 522.9246826        | 3886.511514             | 859.6854858        | 4822.58079              | 618.4058228        |
| 2006 | 1813.24834              | 514.3216553        | 3634.476354             | 484.4759521        | 4904.632963             | 592.2589722        |
|      | 1822.101099             | 433.8069153        | 3842.175197             | 481.6207275        | 3532.810832             | 582.8618774        |
|      | 2446.550643             | 410.9983826        | 3634.476354             | 484.4759521        | 3008.395298             | 463.1409607        |

|             |             |             |             |             |             |
|-------------|-------------|-------------|-------------|-------------|-------------|
| 3565.09602  | 456.1170959 | 4707.849461 | 478.2059021 | 5858.387898 | 511.2420044 |
| 3504.283178 | 458.616272  | 4707.849461 | 478.2059021 | 4092.566025 | 699.5635376 |
| 5084.554314 | 476.4683228 | 2662.336151 | 481.7001953 | 6627.79467  | 617.4700317 |
| 1178.606731 | 359.4854431 | 5093.407618 | 478.2003479 | 3083.61306  | 493.4044495 |
| 1218.412351 | 360.311554  | 4904.632963 | 592.2589722 | 5372.5139   | 451.9984741 |
| 1447.977529 | 361.2221985 | 2304.418972 | 525.258667  | 2939.449233 | 501.0418396 |
| 1351.112138 | 361.2221985 | 3560.890058 | 444.0838318 | 3319.113743 | 466.4873657 |
| 4765.38671  | 530.2787476 | 4316.648792 | 480.7287903 | 2074.25265  | 468.2831421 |
| 4765.38671  | 530.2787476 | 2872.512375 | 483.5078125 | 2769.821421 | 400.1243591 |
| 2962.14831  | 432.1742249 | 4917.193184 | 561.8190918 | 1579.12369  | 413.2289429 |
| 2609.005059 | 420.5856018 | 2170.447358 | 512.9087524 | 2519.080694 | 462.9478149 |
| 3294.781474 | 450.3654175 | 1594.171586 | 549.1306152 | 2176.678447 | 462.793396  |
| 6228.447538 | 522.0019531 | 4864.429878 | 561.8190918 | 3818.959892 | 458.8699341 |
| 666.1585371 | 323.8414917 | 2708.113793 | 509.4853516 | 3662.861613 | 461.2863464 |
| 666.1585371 | 323.8414917 | 5816.102606 | 645.1484375 | 3895.702344 | 515.4295654 |
| 749.761982  | 310.7941895 | 1814.608469 | 566.1691284 | 4016.038606 | 547.6542358 |
| 543.4232627 | 304.690979  | 2250.665293 | 572.5425415 | 3544.562638 | 547.6542358 |
| 3088.087712 | 419.2067261 | 1567.725285 | 571.3723755 | 4016.253005 | 696.6888428 |
| 2093.214289 | 380.7434692 | 1660.413146 | 573.2419434 | 6537.816784 | 687.159729  |
| 1284.088375 | 385.9309998 | 1736.596268 | 489.4904175 | 5219.88083  | 654.5018921 |
| 2213.656589 | 299.758667  | 5801.008225 | 638.949646  | 2437.892497 | 468.2692871 |
| 4606.44095  | 479.9211121 | 4386.488331 | 539.4706421 | 3626.926032 | 699.4216919 |
| 6410.875056 | 523.5773926 | 4181.415134 | 503.6552429 | 3858.108499 | 443.729248  |
| 1608.223308 | 298.0348816 | 2373.928275 | 537.0703125 | 3000.689173 | 459.2694092 |
| 1298.336348 | 305.8131409 | 2233.670867 | 404.7442627 | 1594.723443 | 390.9668274 |
| 2658.15738  | 451.288147  | 2066.598277 | 397.2443237 | 3662.861613 | 461.2863464 |
| 5917.064566 | 535.4506226 | 1494.343431 | 367.3623352 | 4040.535964 | 499.8299255 |
| 5010.867511 | 494.3617554 | 1608.375965 | 369.9586487 | 4343.15485  | 658.12854   |
| 464.7842062 | 306.2455139 | 1788.645431 | 366.0089111 | 3956.587023 | 682.7108765 |
| 581.4770553 | 330.9963379 | 4239.090005 | 472.7141724 | 4620.382164 | 728.6560059 |
| 1459.714426 | 440.5323792 | 2060.755371 | 370.2278442 | 4781.650126 | 728.6560059 |
| 1924.220043 | 453.1327209 | 609.850598  | 256.1974182 | 4930.861709 | 672.1503296 |
| 2011.790973 | 423.6329956 | 5562.916811 | 520.1135864 | 3092.092442 | 724.184082  |
| 1763.120288 | 369.5026245 | 6437.240988 | 555.269165  | 4454.090557 | 604.0408325 |
| 6851.312947 | 540.1896973 | 5928.535469 | 525.086731  | 3242.540593 | 458.3813782 |
| 5807.175512 | 508.0969238 | 637.0116153 | 323.2068176 | 3246.965599 | 611.4490967 |
| 817.6254468 | 255.4325714 | 1224.089162 | 312.3675842 | 2347.327739 | 503.0323792 |
| 609.850598  | 256.1974182 | 579.3630952 | 309.3939209 | 2826.742138 | 541.946228  |
| 722.2037449 | 280.8694153 | 3554.220944 | 410.4768372 | 2708.113793 | 509.4853516 |
| 1058.332554 | 356.3763123 | 4163.301321 | 473.8553772 | 4087.912724 | 453.8693848 |
| 2000.437006 | 254.2597504 | 2021.466629 | 355.3257751 | 2744.292466 | 498.9346008 |
| 1954.151657 | 298.3074341 | 1791.314199 | 402.9981079 | 4300.070443 | 718.7561035 |
| 1483.992307 | 309.0111694 | 2658.15738  | 451.288147  | 1677.641059 | 529.1661377 |
| 1883.097713 | 423.3238525 | 5956.241239 | 539.6509399 | 1889.32417  | 544.9678955 |



|      |             |             |             |             |             |             |
|------|-------------|-------------|-------------|-------------|-------------|-------------|
|      | 3206.882117 | 644.5861206 | 1581.517009 | 296.9681702 |             |             |
|      | 1953.08091  | 523.5617065 | 2612.977356 | 543.6745605 | 5489.112616 | 660.6279907 |
|      | 1881.045304 | 498.4861755 | 5661.289246 | 445.5147705 | 3567.195912 | 704.378479  |
|      | 3862.494874 | 510.741333  | 2550.4218   | 462.1843872 | 4262.496909 | 693.9188843 |
|      | 1171.441404 | 444.1733398 | 3470.090806 | 494.8379822 | 3322.105008 | 504.2371216 |
|      | 1409.178796 | 458.4786072 | 5190.568103 | 651.4440308 | 3628.36768  | 454.3027649 |
|      | 1419.946947 | 438.3283081 | 2827.839171 | 631.8214722 | 2210.633315 | 528.6429443 |
|      | 3920.223691 | 537.5394287 | 4199.637235 | 583.0593872 | 5035.284809 | 492.5591736 |
|      | 2668.579342 | 541.5020752 | 2897.247166 | 615.6720581 | 1708.032776 | 458.3615112 |
|      | 3569.27664  | 584.9431763 | 1589.48267  | 519.5671387 | 1768.076662 | 442.8011169 |
|      | 1019.492839 | 400.3987732 | 1799.003302 | 564.2399902 | 2612.977356 | 543.6745605 |
|      | 2066.297317 | 435.7012329 | 1789.470986 | 527.3380737 | 3792.172586 | 640.6373291 |
|      | 1075.992267 | 403.3083191 | 4762.46622  | 493.5385742 | 4146.056019 | 653.3438721 |
|      | 4510.837527 | 534.3013916 | 2777.395228 | 456.5803528 | 6047.768572 | 714.59729   |
|      | 2522.724664 | 503.2304993 | 2426.560946 | 573.5664673 | 5173.842581 | 703.7675171 |
|      | 1363.807544 | 404.890564  | 2283.8522   | 517.9561157 | 6577.82396  | 720.762207  |
|      | 6331.27421  | 679.4221802 | 2702.619091 | 537.9719238 | 1378.604698 | 513.9371338 |
|      | 7342.181192 | 677.4465942 | 4892.783188 | 654.6132202 | 1814.978865 | 510.9573059 |
|      | 1191.623972 | 395.2850342 | 1337.211243 | 594.9284058 | 1378.604698 | 513.9371338 |
|      | 460.3623152 | 400.6281738 | 1758.406456 | 596.9638062 | 1853.446731 | 435.3311157 |
|      | 999.6998175 | 392.6618652 | 3996.925431 | 644.2877808 | 1257.391974 | 444.016571  |
|      | 2552.213033 | 579.1487427 | 2261.45924  | 511.789093  | 2393.103286 | 595.7428589 |
| 2007 | 3464.130517 | 618.0231323 | 3566.810167 | 562.0539551 | 5154.173623 | 590.194458  |
|      | 2461.795008 | 629.6480103 | 4775.600077 | 638.4296875 | 4150.09012  | 645.409668  |
|      | 1362.985104 | 438.897583  | 2993.28882  | 770.9267578 | 2667.322789 | 735.4325562 |
|      | 1685.846911 | 455.9042664 | 4714.512161 | 716.5560913 | 3002.530959 | 738.7047729 |
|      | 1665.795752 | 343.3474121 | 4137.755308 | 547.6716919 | 1661.950228 | 340.1052246 |
|      | 6439.964847 | 635.9570923 | 1232.6221   | 320.716156  | 2058.836609 | 353.6201477 |
|      | 4263.054543 | 688.789978  | 3756.95196  | 546.920166  | 5265.89618  | 691.3017578 |
|      | 2410.119097 | 661.666626  | 2995.893809 | 583.3825684 | 4256.209035 | 445.1827393 |
|      | 3926.639678 | 676.2260132 | 1239.847955 | 401.2361755 | 3244.159603 | 485.4346313 |
|      | 2300.114185 | 446.3292236 | 2127.92952  | 567.7952271 | 2109.613484 | 455.9745789 |
|      | 1620.608624 | 341.2939148 | 2944.880048 | 530.949585  | 2434.721715 | 517.3726807 |
|      | 1794.03609  | 342.0568848 | 625.2882472 | 344.3737183 | 3907.70092  | 653.3438721 |
|      | 1287.89703  | 587.1696777 | 684.2130805 | 343.3304443 | 2923.084735 | 745.8053589 |
|      | 1588.41551  | 598.0733643 | 5215.53801  | 666.3442993 | 4510.459928 | 724.00354   |
|      | 939.6348943 | 567.7952271 | 1227.849723 | 427.6160889 | 3986.658797 | 735.1182251 |
|      | 1560.479645 | 419.4890747 | 823.7271943 | 427.9157715 | 6644.236583 | 720.762207  |
|      | 7051.273649 | 694.7435913 | 4821.207731 | 576.5457153 | 1267.327678 | 444.3119507 |
|      | 749.3538207 | 345.5281677 | 2368.876346 | 429.0569153 | 4307.089962 | 655.4621582 |
|      | 1245.310337 | 464.2201233 | 2568.233243 | 404.6152954 | 3580.059233 | 509.728241  |
|      | 1662.998191 | 341.7326355 | 3379.997022 | 674.4674683 | 3682.060571 | 583.0593872 |
|      | 939.6348943 | 567.7952271 | 3337.938988 | 665.5708008 | 2679.743591 | 588.3331909 |
|      | 588.5531698 | 392.7366943 | 5078.451232 | 697.5982056 | 2942.558251 | 596.4552002 |

|      |             |             |             |             |             |             |
|------|-------------|-------------|-------------|-------------|-------------|-------------|
|      | 3033.376722 | 667.3212891 | 4726.759183 | 676.2574463 | 2261.45924  | 511.789093  |
|      | 3970.590535 | 634.8388062 | 839.1576925 | 341.3930969 | 5227.901542 | 653.1254883 |
|      | 4150.09012  | 645.409668  | 625.2882472 | 344.3737183 | 880.6251473 | 376.184021  |
|      | 4557.085334 | 736.4408569 | 2635.06499  | 514.6835327 | 1409.006674 | 378.2613831 |
|      | 4396.952169 | 716.5560913 |             |             |             |             |
|      | 1963.385388 | 447.5569153 | 2795.605813 | 381.1653748 | 1427.675474 | 520.1295166 |
|      | 1528.473168 | 419.4890747 | 2931.566014 | 514.576416  | 2606.270828 | 610.399292  |
|      | 2108.890099 | 471.7907715 | 3314.270137 | 634.7966309 | 3066.676031 | 713.7856445 |
|      | 4028.29315  | 484.3494873 | 1829.312165 | 550.0510254 | 4787.65275  | 667.6316528 |
|      | 1472.042526 | 426.9494934 | 1273.577372 | 553.0663452 | 3476.033672 | 613.9732056 |
|      | 1606.020047 | 441.8414917 | 912.0720224 | 517.498291  | 5884.221285 | 557.0432129 |
|      | 2414.885386 | 502.2912598 | 1574.080773 | 487.3503113 | 3143.499775 | 615.2161255 |
|      | 2789.329265 | 537.8149414 | 1561.89907  | 487.3503113 | 2977.816332 | 576.0178833 |
|      | 3615.214186 | 539.4654541 | 5302.578757 | 600.9118042 | 2854.43717  | 614.3699341 |
|      | 1922.724498 | 394.2398376 | 4846.060832 | 600.9118042 | 3591.29469  | 618.9258423 |
|      | 2117.205287 | 432.7813721 | 5311.085158 | 579.1335449 | 1629.300219 | 604.675354  |
|      | 3593.187191 | 608.4832764 | 1596.393866 | 383.9763794 | 1983.31519  | 635.105957  |
|      | 4216.974349 | 496.1033936 | 2326.490389 | 379.9700317 | 2134.27618  | 583.8405762 |
|      | 2510.218573 | 477.8588257 | 2695.855119 | 393.8326111 | 2201.391314 | 588.3518677 |
|      | 3626.654456 | 474.9475708 | 912.0720224 | 517.498291  | 4650.340938 | 605.5949097 |
|      | 1563.643251 | 398.8275452 | 604.0080627 | 310.7766418 | 2259.677302 | 568.1225586 |
|      | 4425.237142 | 608.4832764 | 3511.862408 | 674.3015137 | 2440.39677  | 702.6241455 |
|      | 1751.114054 | 517.498291  | 5041.59974  | 658.5535278 | 2009.115751 | 684.1715698 |
|      | 836.9138627 | 353.3545837 | 5406.010538 | 642.2284546 | 5628.444024 | 686.666748  |
| 2008 | 622.044268  | 356.0162964 | 3442.954994 | 645.4325562 | 1823.34546  | 697.1140137 |
|      | 4395.019356 | 594.9351807 | 3530.233198 | 640.6580811 | 1823.34546  | 697.1140137 |
|      | 6897.298604 | 607.0678711 | 6326.800537 | 678.4151611 | 1997.321139 | 523.0956421 |
|      | 6836.027752 | 600.2261963 | 3525.355305 | 556.7574463 | 2959.648979 | 673.7339478 |
|      | 1009.115714 | 321.0990906 | 2879.847579 | 672.9406738 | 1905.136034 | 365.1811523 |
|      | 1094.535778 | 322.8182678 | 7071.553495 | 683.5513306 | 2865.379085 | 507.0002441 |
|      | 509.6950335 | 311.4904175 | 1754.394551 | 530.0432129 | 2230.504723 | 506.5472107 |
|      | 648.585965  | 309.2572632 | 1909.838682 | 539.4735107 | 2489.189324 | 490.1532898 |
|      | 3462.149041 | 554.8996582 | 2583.81728  | 531.4111938 | 3331.890768 | 469.3132935 |
|      | 3186.343381 | 588.0395508 | 2165.552946 | 531.2142944 | 1546.070798 | 420.3421326 |
|      | 2522.236936 | 583.1207886 | 3866.283069 | 667.2427368 | 2732.515933 | 505.3034973 |
|      | 3344.91252  | 448.4681091 | 2285.739799 | 598.6391602 | 1687.622437 | 397.1858215 |
|      | 1480.946237 | 481.1562805 | 3198.988263 | 630.1127319 | 5432.531065 | 601.6749268 |
|      | 3097.690525 | 381.8927307 | 4795.384668 | 668.2039185 | 5270.439723 | 597.7762451 |
|      | 4507.494908 | 570.1529541 | 3527.647338 | 719.1536255 | 3954.963817 | 553.9833984 |
|      | 5400.925702 | 583.4039917 | 5384.312067 | 676.6212769 | 638.313273  | 321.3121643 |
|      | 5140.319282 | 560.4509277 | 4900.751927 | 667.2526855 | 1512.454936 | 322.6444702 |
|      | 4720.393282 | 616.6896362 | 6818.323755 | 664.6752319 | 853.6673853 | 312.3903503 |
|      | 2448.911831 | 591.3833008 | 6374.783073 | 685.8082886 | 4686.754967 | 543.6195679 |
|      | 3626.153277 | 598.2180786 | 2037.269026 | 695.1994019 | 2384.865879 | 484.1136475 |

|      |             |             |             |             |             |             |
|------|-------------|-------------|-------------|-------------|-------------|-------------|
|      | 5064.389634 | 602.1943359 | 1555.020297 | 509.5377808 | 2134.334005 | 504.7408142 |
|      | 1787.613781 | 523.2486572 | 1562.866379 | 520.1893921 | 2056.383696 | 380.2616272 |
|      | 3837.961665 | 632.5402832 | 3501.712768 | 565.3322144 | 3498.122542 | 683.1116333 |
|      | 1574.080773 | 487.3503113 | 1899.169149 | 542.3154907 | 2959.74574  | 596.2042236 |
|      | 4577.024212 | 582.722168  | 2551.404079 | 538.0128784 | 4892.777338 | 657.1652832 |
|      | 926.206615  | 352.9895935 | 3142.06391  | 643.3963013 | 2553.410243 | 686.7666626 |
|      | 2654.083533 | 353.3545837 | 2816.435296 | 679.1834106 | 2418.245341 | 684.8115845 |
|      | 1192.852783 | 351.4290771 | 3817.696247 | 694.6522827 | 4826.209584 | 643.4158936 |
|      | 1395.809498 | 389.3469238 | 5242.341385 | 664.6752319 | 1263.487372 | 432.1824646 |
|      | 2534.825065 | 324.3730469 | 2915.222277 | 698.8087769 | 2984.844122 | 625.4395142 |
|      | 2008.108081 | 378.8790894 | 2006.405051 | 698.8087769 | 4342.403185 | 606.0733643 |
|      | 4219.012971 | 686.6057129 | 2878.069521 | 602.9475708 | 3674.266808 | 601.5689087 |
|      | 3768.841496 | 643.5641479 | 4731.415147 | 658.5535278 | 4012.535482 | 683.1116333 |
|      | 3167.31838  | 716.593689  | 2427.02689  | 653.0394287 | 2443.688126 | 751.9395752 |
|      | 2767.40445  | 580.0125732 |             |             |             |             |
|      | 3279.495706 | 673.2567139 | 2522.984195 | 713.6210938 | 3009.760036 | 757.0627441 |
|      | 1918.113782 | 394.3920288 | 2937.388691 | 644.291748  | 3642.206857 | 725.3291626 |
|      | 2134.1347   | 520.2265625 | 5440.800934 | 779.3911133 | 4860.966191 | 720.9538574 |
|      | 1490.706228 | 489.694397  | 3642.348864 | 825.3088379 | 2919.996128 | 846.1868286 |
|      | 1649.902377 | 498.415741  | 5895.870781 | 804.5491943 | 3056.275697 | 667.234314  |
| 2009 | 1667.862874 | 483.5700378 | 2729.493699 | 808.4346313 | 3391.649552 | 658.7260742 |
|      | 2971.435093 | 524.3197632 | 6261.06166  | 828.4644165 | 4617.278135 | 648.5539551 |
|      | 3968.371777 | 525.8130493 | 3737.457019 | 795.8416138 | 3258.047428 | 799.87854   |
|      | 2582.932416 | 548.0203857 | 2832.516781 | 627.2692261 | 4135.847657 | 694.6280518 |
|      | 1234.100857 | 432.7188721 | 2231.20073  | 546.6543579 | 4332.308935 | 623.5441284 |
|      | 2295.86501  | 498.021698  | 2262.493841 | 546.7905273 | 3518.559654 | 605.1843262 |
|      | 1382.018838 | 438.5982971 | 2403.518239 | 623.7972412 | 2054.18864  | 566.7530518 |
|      | 1315.399417 | 435.1880493 | 2617.566586 | 627.9107666 | 2482.478857 | 550.0925903 |
|      | 3182.909587 | 575.053772  | 2816.353915 | 658.225647  | 2457.283534 | 563.8597412 |
|      | 2325.21814  | 521.3665161 | 4039.9125   | 720.9538574 | 2539.157744 | 606.8366089 |
|      | 3539.521988 | 519.5446777 | 3180.906554 | 843.1019287 | 3868.462687 | 655.4414063 |
|      | 1725.622344 | 600.5822754 | 4924.326557 | 733.0764771 | 3849.064031 | 657.2376099 |
|      | 691.9404363 | 482.3800354 | 3659.547783 | 671.1212158 | 3849.064031 | 657.2376099 |
|      | 5377.862473 | 646.5491333 | 4135.847657 | 694.6280518 | 3009.999418 | 679.921936  |
|      | 4365.299457 | 642.7000122 | 6206.101566 | 623.5878906 | 2394.971719 | 613.3270874 |
|      | 4563.251882 | 592.7345581 | 3715.419224 | 680.4510498 | 2685.834538 | 640.2991333 |
|      | 6764.135737 | 610.5093994 | 3387.82782  | 653.0513306 | 1996.900289 | 523.0956421 |
|      | 1256.723449 | 459.6973267 | 3576.101773 | 715.7276001 | 5174.358677 | 615.5549927 |
|      | 601.6986907 | 461.1205444 | 2084.795337 | 595.0497437 | 2888.82336  | 417.9342651 |
|      | 2017.193185 | 432.9204407 | 1932.970219 | 607.0455933 | 686.7690843 | 482.4422302 |
|      | 1694.460707 | 431.723999  | 2102.284902 | 551.739624  | 3992.946817 | 738.6154785 |
|      | 931.9477627 | 423.3287964 | 2745.70262  | 560.6884155 | 3653.234662 | 801.9102783 |
|      | 933.213387  | 433.2407837 | 5137.299869 | 634.7844238 | 3941.963122 | 629.4086914 |
|      | 3996.765126 | 609.4898682 | 2278.703887 | 679.5809326 | 2896.44714  | 650.7851563 |

|      |             |             |             |             |             |             |
|------|-------------|-------------|-------------|-------------|-------------|-------------|
|      | 3581.822818 | 607.4056396 | 5031.557238 | 647.7270508 | 2303.433954 | 607.2676392 |
|      | 3629.699825 | 630.326355  | 3028.607689 | 567.9156494 | 3109.92658  | 700.0879517 |
|      | 4029.904949 | 487.6088257 | 5141.295961 | 759.3180542 | 3626.541593 | 655.692749  |
|      | 2406.010791 | 545.593811  | 2154.124415 | 652.5585938 | 4436.031402 | 776.2104492 |
|      | 3950.187024 | 421.4816589 | 1649.295052 | 651.7206421 | 6025.947816 | 828.4644165 |
|      | 4714.227517 | 620.2739868 | 1687.674736 | 654.0019531 | 2878.162848 | 630.4581909 |
|      | 5791.031808 | 607.9168701 | 2719.24533  | 620.6204224 | 2878.162848 | 630.4581909 |
|      | 3723.293788 | 589.9605103 | 5391.110899 | 746.3612671 | 4641.941042 | 647.7270508 |
|      | 2744.084734 | 419.3299561 | 2098.995271 | 525.3035889 | 4680.927283 | 733.4636841 |
|      | 4567.488511 | 420.2712097 | 2695.972445 | 525.7765503 | 2450.717707 | 652.9293823 |
|      | 3620.188167 | 616.651123  | 3515.771649 | 464.2765503 | 2719.24533  | 620.6204224 |
|      | 2394.971719 | 613.3270874 | 1880.357188 | 315.699585  | 3112.068315 | 487.0744934 |
|      | 2879.783758 | 693.9691162 | 2290.240863 | 480.9501953 | 778.5026997 | 290.3171082 |
|      | 825.7012584 | 425.5112305 | 1730.610575 | 415.5719299 | 5277.54901  | 618.6328735 |
|      | 1635.606481 | 615.9005737 | 2340.289346 | 513.9644775 | 5821.833041 | 653.4656982 |
|      | 1996.900289 | 523.0956421 | 2915.85991  | 517.4185181 | 3815.378828 | 648.3487549 |
|      | 5174.358677 | 615.5549927 | 4205.994762 | 530.6428833 | 2100.808413 | 523.8533936 |
|      | 4581.357472 | 615.3270264 | 4247.588871 | 561.4997559 | 4374.449411 | 609.3531494 |
|      | 955.5454803 | 480.9605713 | 3244.644672 | 575.053772  | 4555.115486 | 600.5630493 |
|      | 4794.341885 | 616.31073   | 4451.856607 | 537.4783936 | 1111.186231 | 600.5822754 |
|      | 731.1404681 | 484.5325928 | 3294.223001 | 419.5691223 | 3119.430173 | 364.747467  |
|      | 1211.891888 | 514.8742676 | 4014.602988 | 433.3969116 |             |             |
|      | 1898.650011 | 493.0342102 | 3226.116316 | 649.7907715 | 2423.028427 | 422.5329895 |
|      | 2686.803427 | 429.3529968 | 5554.863946 | 618.1281128 | 2602.373236 | 469.5094604 |
|      | 4451.633869 | 427.9467773 | 5780.560053 | 489.1512451 | 5265.331807 | 553.4671631 |
|      | 1907.645098 | 403.9212341 | 3881.87006  | 560.6026611 | 3709.32752  | 500.2646179 |
|      | 3591.071988 | 466.8246155 | 4261.409135 | 481.0480042 | 5354.788    | 541.0948486 |
|      | 4844.218408 | 469.612793  | 4596.198674 | 496.3931274 | 2051.608089 | 363.9388123 |
|      | 1777.101132 | 368.7461243 | 3681.678598 | 500.0875244 | 2022.11839  | 362.6859741 |
|      | 3261.006808 | 403.7774658 | 3067.731239 | 557.6793823 | 3875.375336 | 487.9589844 |
|      | 1967.686686 | 370.3890991 | 3090.040402 | 590.206543  | 3211.40032  | 523.0136719 |
|      | 1728.292507 | 368.4541321 | 3000.804982 | 580.7806396 | 3621.438006 | 538.4436035 |
|      | 4865.14598  | 539.4706421 | 1574.633911 | 516.588562  | 3103.615405 | 485.7859802 |
|      | 5232.789775 | 436.013031  | 3329.420684 | 553.7712402 | 3841.589252 | 548.8772583 |
|      | 4558.899631 | 420.6364441 | 2618.574858 | 649.8892212 | 2593.887446 | 469.5094604 |
|      | 864.8462965 | 338.5408325 | 4397.101966 | 683.9651489 | 2636.603372 | 462.5219116 |
|      | 839.5882828 | 340.0117798 | 5223.071311 | 683.9651489 | 4899.974738 | 550.3930054 |
|      | 4007.242618 | 538.9005127 | 1714.808051 | 523.4407959 | 5410.794661 | 527.6998901 |
|      | 6552.032929 | 561.4165039 | 1985.015985 | 525.7765503 | 1032.027415 | 338.3036804 |
|      | 3861.524087 | 476.556427  | 2141.263783 | 480.3381042 | 1449.349466 | 385.6897888 |
|      | 6691.230356 | 477.2903748 | 2882.291004 | 487.4779358 | 2409.087656 | 395.7871704 |
|      | 6176.229317 | 507.0261536 | 3262.19751  | 533.616394  | 2593.887446 | 469.5094604 |
|      | 3782.480028 | 508.8555603 | 2953.779081 | 536.869751  | 4142.711765 | 611.8282471 |
|      | 1820.125728 | 457.5506287 | 2439.793859 | 542.0758667 | 4254.347955 | 625.2122192 |
| 2010 |             |             |             |             |             |             |

|      |             |             |             |             |             |             |
|------|-------------|-------------|-------------|-------------|-------------|-------------|
|      | 2198.407554 | 487.6047668 | 3383.150092 | 522.7700806 | 3147.508009 | 707.6310425 |
|      | 1923.604659 | 503.1116943 | 3412.334509 | 705.7303467 | 2596.213192 | 511.4908752 |
|      | 2773.973425 | 398.561615  | 3306.020899 | 529.4405518 | 3015.460198 | 535.086853  |
|      | 4845.536318 | 497.5168152 | 3881.87006  | 560.6026611 | 2159.170249 | 495.7576904 |
|      | 5834.523445 | 508.8865967 | 3867.291829 | 531.776062  | 2768.772537 | 482.5857239 |
|      | 6109.716796 | 545.2685547 | 3592.411301 | 494.0158691 | 1952.50736  | 493.943634  |
|      | 3075.658963 | 536.2799683 | 4770.509664 | 606.0733643 | 2733.052135 | 520.1786499 |
|      | 2723.141664 | 396.8822021 | 2177.438012 | 543.371582  | 3312.21164  | 502.6997375 |
|      | 3028.482792 | 495.7574158 | 1731.00449  | 586.0554199 | 3312.21164  | 502.6997375 |
|      | 3032.890772 | 499.9919128 | 4145.167101 | 563.8890381 | 3574.119833 | 519.001709  |
|      | 3032.890772 | 499.9919128 | 5501.544619 | 521.6065063 | 2988.277974 | 531.6247559 |
|      | 3180.205232 | 559.7497559 | 4357.13511  | 490.627655  | 4773.969891 | 624.5822144 |
|      | 1882.842012 | 490.4353638 | 2313.592453 | 586.8519287 | 4805.501549 | 642.895752  |
|      | 1920.357588 | 499.0232239 | 1666.145387 | 536.291687  | 4887.42661  | 626.3632813 |
|      | 2636.603372 | 462.5219116 | 2115.284339 | 609.9052124 | 4515.080415 | 644.9797974 |
|      | 5345.512173 | 556.5084229 | 3009.800895 | 615.1702271 | 4741.561149 | 595.5256958 |
|      | 4283.65266  | 550.3930054 | 1677.641059 | 529.1661377 | 4627.931645 | 604.9868774 |
|      | 5323.252597 | 503.9785767 | 5625.217178 | 639.7017822 | 4901.902041 | 606.9954834 |
|      | 2177.006728 | 338.5408325 | 2762.510523 | 467.5601501 | 3183.35779  | 614.4419556 |
|      | 1375.483963 | 336.73349   | 4053.247477 | 630.574707  | 5119.144282 | 633.010437  |
|      | 904.7223088 | 362.9156189 | 2909.747313 | 562.1502686 | 3139.376955 | 616.1130981 |
|      | 2762.444844 | 349.0975342 | 2642.070387 | 526.4685669 | 2719.828926 | 617.0089722 |
|      | 2522.964141 | 397.0753784 | 3368.453691 | 417.1106567 | 3611.838622 | 665.6869507 |
|      | 5785.109791 | 675.7747192 | 2492.863355 | 416.87854   | 2812.177159 | 439.473999  |
|      | 3248.126218 | 647.8711548 | 1463.86897  | 393.2408447 | 1979.513842 | 372.4204712 |
|      | 5770.867727 | 595.5256958 | 3017.149039 | 437.2796631 | 3724.174875 | 634.0810547 |
|      | 3641.174424 | 564.8779907 |             |             |             |             |
|      | 3999.39453  | 673.0574341 | 2811.34365  | 673.0250854 | 1270.50942  | 436.7063293 |
|      | 2804.246751 | 632.9031372 | 1457.685311 | 576.2520142 | 1660.648529 | 366.138916  |
|      | 2822.897739 | 575.6697388 | 2832.583272 | 612.1142578 | 879.3883362 | 416.2446899 |
|      | 2328.232701 | 480.9391479 | 4673.797395 | 782.9263306 | 3898.253352 | 805.6934814 |
|      | 4983.617609 | 465.8595276 | 2825.982043 | 834.3703003 | 4555.870329 | 748.5214233 |
|      | 1655.329918 | 396.9292908 | 5423.286601 | 809.7485962 | 4053.247477 | 630.574707  |
|      | 1812.877765 | 415.0507813 | 2745.646165 | 813.5392456 | 1993.014408 | 517.1536865 |
|      | 1657.775269 | 395.4736023 | 4677.355402 | 839.946167  | 2816.038038 | 499.4000244 |
| 2011 | 2306.419235 | 500.2331543 | 4966.120346 | 839.946167  | 2140.413233 | 514.2880859 |
|      | 3194.105393 | 544.1958618 | 3937.959958 | 800.7932739 | 4099.101381 | 620.8505859 |
|      | 1127.694177 | 365.1731567 | 2016.282742 | 610.5524292 | 3230.0994   | 686.843811  |
|      | 2446.360309 | 401.4272766 | 1537.972962 | 487.905304  | 3513.402351 | 596.3745728 |
|      | 1345.679153 | 369.4967346 | 3093.28262  | 582.0365601 | 2403.900052 | 604.9578247 |
|      | 3174.777167 | 646.6668701 | 3239.370969 | 600.1751709 | 4517.645693 | 778.8295898 |
|      | 3636.913488 | 456.0377502 | 3291.80135  | 854.989624  | 1990.650417 | 498.2687683 |
|      | 3194.645813 | 524.0961304 | 3094.074349 | 599.0600586 | 3203.114786 | 586.3708496 |
|      | 624.3724341 | 378.4753723 | 4918.774716 | 543.6954346 | 4446.293156 | 730.550293  |

|             |             |             |             |             |             |
|-------------|-------------|-------------|-------------|-------------|-------------|
| 754.6320013 | 378.736908  | 3255.117631 | 569.7220459 | 2972.056387 | 609.9865723 |
| 4051.667237 | 657.24823   | 4736.488354 | 632.8482666 | 4209.522269 | 597.3848877 |
| 6096.042593 | 651.9677124 | 5846.030372 | 735.4421387 | 1771.908615 | 674.2342529 |
| 5238.087011 | 671.5396118 | 3890.276509 | 720.6133423 | 2539.834974 | 615.7559204 |
| 3494.130152 | 596.6053467 | 2606.271666 | 552.3671265 | 3342.265238 | 636.9329224 |
| 810.4466181 | 385.5507507 | 2991.372261 | 531.7664795 | 1945.01488  | 607.9084473 |
| 400.1735862 | 361.3397827 | 4311.121799 | 594.628418  | 1015.02248  | 399.1729736 |
| 1422.957472 | 367.0894775 | 4557.694619 | 555.0743408 | 2309.172039 | 354.9204712 |
| 703.0896242 | 353.6461182 | 3941.764063 | 632.8482666 | 2964.775751 | 464.4750366 |
| 936.8271092 | 361.0743408 | 5435.291463 | 763.8570557 | 4188.359547 | 582.2809448 |
| 5315.376972 | 567.7153931 | 1999.360382 | 635.4523926 | 4365.556121 | 818.2539673 |
| 3741.085197 | 593.7250977 | 1945.01488  | 607.9084473 | 4471.746689 | 730.0842896 |
| 1897.597113 | 441.8323669 | 5349.489882 | 753.7861938 | 1993.962563 | 515.8479004 |
| 1976.912405 | 480.379303  | 3727.015641 | 487.1690063 | 3190.272791 | 858.3588257 |
| 2177.542289 | 503.0392151 | 3082.844556 | 558.6699829 | 2607.892567 | 596.9962158 |
| 2732.512284 | 369.5729065 | 3255.19193  | 631.6738892 | 2565.546139 | 587.9032593 |
| 5899.206976 | 597.996521  | 4317.99217  | 768.8477173 | 3268.401479 | 805.0955811 |
| 3868.017025 | 656.1183472 | 2686.907777 | 615.6337891 | 3173.768132 | 551.3761597 |
| 5025.761412 | 628.5634155 | 2695.678912 | 671.7163086 | 3569.492201 | 543.5001831 |
| 2774.796462 | 500.1523132 | 1991.435271 | 340.8534851 | 2097.131196 | 607.9887695 |
| 1720.492444 | 368.4534607 | 2421.700285 | 453.8400879 | 2809.374939 | 569.5710449 |
| 2597.063254 | 565.3164063 | 2766.194642 | 448.0523376 | 4136.084035 | 575.9174805 |
| 2238.232557 | 566.7493286 | 2893.08643  | 496.3751831 | 1827.069212 | 586.3995361 |
| 2238.232557 | 566.7493286 | 4095.348859 | 544.6087646 | 2174.688145 | 579.3662109 |
| 3163.934371 | 670.2189331 | 1396.603838 | 364.924469  | 2962.082173 | 583.7608643 |
| 2994.258686 | 629.3490601 | 1327.138386 | 368.0622253 | 1961.121576 | 586.6585083 |
| 496.1479883 | 355.8174744 | 4003.69377  | 633.6595459 | 1961.121576 | 586.6585083 |
| 1787.158809 | 550.0222778 | 4087.874079 | 482.0250549 | 2810.194987 | 635.6899414 |
| 2686.366384 | 524.0961304 | 3581.865988 | 578.743103  | 4783.613831 | 524.5350952 |
| 2717.98891  | 467.5601501 | 992.4259781 | 377.5324097 | 4454.061277 | 579.5415649 |
| 4286.971248 | 674.3502197 | 6740.102714 | 682.7905273 | 1925.408506 | 367.5460815 |
| 4286.971248 | 674.3502197 | 5824.267614 | 659.4483032 | 2442.302556 | 548.3360596 |
| 3556.888044 | 588.8300781 | 647.6599842 | 387.0411682 | 1349.75198  | 417.0799255 |
| 624.3724341 | 378.4753723 | 1963.903564 | 367.5427856 | 1619.542777 | 310.7489624 |
| 789.1794769 | 378.5418396 | 3369.913889 | 529.928833  | 2575.556219 | 367.6393127 |
| 1935.930262 | 381.7797852 |             |             |             |             |
| 2089.213322 | 336.9482422 | 3572.820659 | 758.4125977 | 3415.871513 | 664.4147949 |
| 2775.154003 | 610.9005737 | 4077.430748 | 771.5241699 | 3284.347993 | 484.0772705 |
| 3999.39453  | 673.0574341 | 3849.146988 | 735.3140259 | 2546.413369 | 689.4345703 |
| 5441.903853 | 749.2268066 | 3106.564474 | 634.3449097 | 2016.282742 | 610.5524292 |
| 2575.299361 | 459.8435669 | 3136.711407 | 713.4975586 | 2497.707106 | 526.1359863 |
| 2432.582657 | 499.7518616 | 3466.467916 | 628.8552246 | 3146.757957 | 544.5632324 |
| 3796.853419 | 493.1864929 | 3259.892511 | 671.7025146 | 3153.159657 | 565.9604492 |
| 4463.861695 | 510.5510254 | 4451.623309 | 624.5916748 | 1591.680324 | 392.2952576 |

|             |             |             |             |             |             |
|-------------|-------------|-------------|-------------|-------------|-------------|
| 1757.252157 | 456.882843  | 1798.10599  | 581.6300659 | 3918.158093 | 620.7612915 |
| 2545.852241 | 542.3729248 | 1819.810324 | 575.6886597 | 3441.895455 | 620.9862061 |
| 4257.707281 | 570.1697388 | 2024.200254 | 640.9703979 | 4688.402047 | 627.6386108 |
| 1109.380471 | 391.616333  | 2436.678801 | 634.0673218 | 1879.914834 | 408.0526123 |
| 2375.623794 | 426.4118347 | 2537.94842  | 633.8235474 | 3495.100635 | 581.4811401 |
| 1377.099332 | 396.5507202 | 3122.277015 | 649.5540161 | 4247.977913 | 618.2456055 |
| 1110.741118 | 395.7168579 | 2460.43344  | 651.8416138 | 3893.317385 | 618.9920654 |
| 3423.129629 | 632.7649536 | 3264.679552 | 701.8900757 | 2075.106103 | 421.422821  |
| 4533.317076 | 525.8585205 | 3612.892871 | 744.187439  | 2187.713478 | 619.5726318 |
| 2875.964025 | 508.4825134 | 2915.220639 | 793.2081909 | 622.4978513 | 394.9793396 |
| 4184.066436 | 504.6490479 | 5115.595976 | 765.3773193 | 2802.010986 | 604.4663696 |
| 5468.928788 | 644.4439697 | 5352.740632 | 812.2626343 | 5068.287726 | 657.1105957 |
| 5565.731124 | 661.6398315 | 5536.569589 | 812.2626343 | 4218.971482 | 608.715332  |
| 4250.81756  | 592.8766479 | 4412.671139 | 761.4928589 | 2425.044663 | 419.9893799 |
| 6477.209958 | 671.9812622 | 2348.843804 | 637.5087891 | 1166.764712 | 457.3904114 |
| 1779.780809 | 420.901947  | 1364.512997 | 555.4320068 | 4423.089165 | 739.9827881 |
| 616.779955  | 422.7440491 | 1648.681393 | 565.4897461 | 2271.322424 | 573.2959595 |
| 560.3397703 | 399.4674072 | 1634.277073 | 565.6919556 | 4070.365663 | 746.2458496 |
| 1976.242297 | 408.1721802 | 2695.956703 | 646.5944214 | 2703.37199  | 659.9398804 |
| 724.0845888 | 392.8936157 | 3808.266477 | 669.0859985 | 1818.113448 | 584.4244995 |
| 4635.764574 | 575.3532715 | 4028.41833  | 757.4224854 | 2636.263857 | 564.3056641 |
| 5358.538657 | 613.3716431 | 2460.376371 | 679.1342163 | 2460.43344  | 651.8416138 |
| 2290.969802 | 505.1305847 | 3321.30866  | 628.9649658 | 4063.830548 | 677.1864624 |
| 2610.191415 | 570.1189575 | 2708.860581 | 677.4400635 | 3530.936943 | 663.2012939 |
| 2539.878471 | 422.0072937 | 3233.662864 | 647.460022  | 3727.496515 | 772.411377  |
| 4566.5858   | 598.6547241 | 3515.788327 | 664.6651611 | 4781.627362 | 741.8404541 |
| 4706.288691 | 612.4195557 | 5163.824002 | 733.697998  | 3055.666697 | 633.9938354 |
| 3626.103843 | 589.5500488 | 5312.22134  | 758.9840698 | 2906.235722 | 642.5786133 |
| 4881.506003 | 635.5791626 | 2317.03741  | 671.5812378 | 2769.355359 | 648.914856  |
| 2604.407741 | 611.8840332 | 1862.355871 | 710.4959106 | 3904.884817 | 746.2458496 |
| 2512.218745 | 550.5741577 | 3285.109347 | 672.3996582 | 2939.413484 | 823.9734497 |
| 2437.980156 | 420.588501  | 3801.542549 | 687.2824097 | 3136.711407 | 713.4975586 |
| 2821.60659  | 617.0609741 | 2354.70224  | 714.7244263 | 3663.050365 | 719.697998  |
| 2187.713478 | 619.5726318 | 3123.630223 | 649.3498535 | 3922.573549 | 642.791748  |
| 3145.202196 | 676.1826172 | 4386.999848 | 733.697998  | 3738.192863 | 711.5189209 |
| 3010.602509 | 667.7514648 | 3773.318356 | 783.7741089 | 4468.399428 | 702.0456543 |
| 3420.487841 | 591.5934448 | 1960.954432 | 739.3341675 | 4304.194625 | 690.140686  |
| 2857.559357 | 574.6343994 | 2453.024208 | 747.0783691 | 3696.434243 | 701.3178711 |
| 2650.450202 | 514.6835327 | 1788.45248  | 745.4989624 | 4448.020588 | 674.55896   |
| 5388.3765   | 634.2377319 | 2659.58922  | 747.7147217 | 5177.256809 | 740.8403931 |
| 4702.245739 | 621.4511719 | 1971.616617 | 642.4840698 | 5457.850135 | 740.8403931 |
| 5388.3765   | 634.2377319 | 4717.511379 | 744.4341431 | 3038.359186 | 745.4418945 |
| 822.2655942 | 348.6730652 | 4502.461947 | 424.1095276 | 3728.084202 | 715.1906738 |
| 2096.692218 | 479.9938049 | 3679.000708 | 447.227478  | 2968.818749 | 826.3596802 |

|      |             |             |             |             |             |             |
|------|-------------|-------------|-------------|-------------|-------------|-------------|
|      | 2000.629113 | 419.1314087 | 1786.247474 | 379.2911072 | 3119.399113 | 651.4838867 |
|      | 2357.831063 | 434.9237976 | 4078.983406 | 711.6328125 | 2909.052831 | 712.9503784 |
|      | 2857.559357 | 574.6343994 | 4166.489488 | 651.9214478 | 2392.112379 | 806.9675293 |
|      | 1763.120288 | 369.5026245 | 5528.523067 | 471.44104   | 2470.706002 | 549.9317017 |
|      | 1764.145251 | 508.4985352 | 4496.871226 | 500.9762268 | 3636.278349 | 542.1060181 |
|      | 3320.980681 | 611.8796997 | 3420.19983  | 477.7811279 | 2179.978663 | 542.0023804 |
|      | 2176.407678 | 399.7361145 | 2124.263066 | 454.3167419 | 3398.901292 | 538.4354858 |
|      | 2552.378869 | 462.5219116 | 1451.016753 | 331.2242737 | 2819.279104 | 540.9210205 |
|      | 2584.048999 | 379.5107422 | 3851.238731 | 510.8357544 | 3478.744876 | 596.6326904 |
|      | 1913.107188 | 362.5263367 | 4084.420356 | 516.6132813 | 4716.861644 | 597.9698486 |
|      | 5020.865958 | 372.8979187 | 4084.420356 | 516.6132813 | 4479.588243 | 625.3953247 |
|      | 1344.074438 | 308.750885  | 3250.127767 | 578.0202637 | 4556.030151 | 557.2893066 |
|      | 1493.583268 | 333.2406311 | 3140.619481 | 564.0600586 | 2741.949282 | 588.1812134 |
|      | 2350.084347 | 390.0686646 | 958.4625038 | 292.6213989 | 2589.959819 | 585.2494507 |
|      | 2303.091592 | 392.7828064 | 1800.464427 | 500.9586792 | 2741.949282 | 588.1812134 |
|      | 4386.25578  | 422.0614624 | 1257.213675 | 457.3600159 | 2108.929715 | 463.6526489 |
|      | 4733.115728 | 361.8088989 | 3323.432711 | 417.8225403 | 3921.891434 | 561.0527344 |
|      | 1055.303964 | 294.3840942 | 5647.104909 | 498.2397461 | 3616.403382 | 630.5686646 |
|      | 983.7491852 | 294.0315552 | 2493.757838 | 263.2424011 | 3129.491707 | 723.3968506 |
|      | 1882.378359 | 308.8328552 | 2297.529606 | 329.254303  | 4390.634112 | 639.4326172 |
|      | 1042.046192 | 296.7392883 | 2964.775751 | 464.4750366 | 5179.326033 | 508.6281738 |
|      | 4794.446891 | 496.3208923 | 2501.442966 | 686.0522461 | 3469.856825 | 525.295166  |
|      | 5446.026003 | 499.8864136 | 4815.738837 | 649.1752319 | 3804.187645 | 630.4009399 |
| 2013 | 5663.521102 | 543.1051025 | 2514.564976 | 481.0381775 | 2918.133633 | 610.8453979 |
|      | 7438.002595 | 552.0811157 | 3185.062784 | 650.0155029 | 2560.370217 | 536.8887939 |
|      | 1606.469637 | 320.4765015 | 3969.725786 | 623.0950928 | 2960.247268 | 538.9257813 |
|      | 1074.757852 | 323.867218  | 3596.069645 | 630.5686646 | 5082.144321 | 554.4710693 |
|      | 2410.545159 | 309.5396729 | 2629.874949 | 726.1413574 | 5071.104964 | 519.3132935 |
|      | 1824.122562 | 311.3738708 | 2690.745157 | 548.7102051 | 2569.966269 | 596.2275391 |
|      | 738.1750852 | 292.1281128 | 3908.959038 | 541.3612671 | 2844.458736 | 606.5343628 |
|      | 1824.122562 | 311.3738708 | 3130.320699 | 541.9440308 | 3163.236041 | 609.958374  |
|      | 1418.480963 | 297.1137695 | 2927.679095 | 513.4592285 | 3381.150968 | 609.414978  |
|      | 3890.758422 | 472.2533264 | 2989.14641  | 582.4907837 | 3650.666307 | 611.5922852 |
|      | 4987.892688 | 460.6096497 | 3857.807933 | 508.5434875 | 2296.926938 | 589.8579102 |
|      | 6215.428178 | 499.4158325 | 4298.517546 | 585.4961548 | 1824.656115 | 365.5781555 |
|      | 4091.929887 | 450.3835754 | 4202.06763  | 558.1778564 | 2663.603452 | 667.6057739 |
|      | 1727.083384 | 410.5696106 | 1700.446639 | 491.158783  | 2270.926689 | 250.3731232 |
|      | 1304.301338 | 469.9353638 | 2941.225302 | 474.3776245 | 798.1348482 | 254.9661102 |
|      | 2566.212717 | 331.0860291 | 1665.028209 | 488.6616516 | 2475.893854 | 520.1467285 |
|      | 2819.279104 | 540.9210205 | 1550.800901 | 445.5839539 | 2348.843804 | 637.5087891 |
|      | 3275.684719 | 636.1032104 | 4529.700309 | 461.3793945 | 2294.132609 | 359.0986328 |
|      | 1895.464456 | 472.6832886 | 2722.604424 | 494.0712585 | 1732.764654 | 313.1139221 |
|      | 3027.66332  | 552.4296875 | 2636.732269 | 330.563385  | 4701.470353 | 383.9818726 |
|      | 2989.14641  | 582.4907837 | 6058.265406 | 525.4923096 | 2110.270538 | 364.9069519 |



|      |             |             |             |             |             |             |
|------|-------------|-------------|-------------|-------------|-------------|-------------|
|      | 3312.788579 | 559.5175781 | 1925.72523  | 342.9372864 | 4231.87147  | 506.4485168 |
|      | 3238.544478 | 606.5343628 | 2057.579978 | 484.3839417 | 2363.168673 | 464.4750366 |
|      | 2766.776257 | 568.5539551 | 5084.865944 | 643.0556641 | 3770.31203  | 507.7445679 |
|      | 2098.258222 | 643.3815918 | 2618.726662 | 609.7295532 | 5778.392666 | 523.3696899 |
|      | 797.7915702 | 298.7559509 | 2296.926938 | 589.8579102 | 4303.95744  | 479.8575439 |
|      | 5096.664483 | 637.3032837 |             |             |             |             |
|      | 3233.129538 | 679.5748901 | 2968.041538 | 587.4242554 | 2173.966757 | 484.74823   |
|      | 2384.497605 | 417.3962097 | 3599.347711 | 613.5913086 | 1795.514207 | 496.728302  |
|      | 1736.596268 | 489.4904175 | 929.7680719 | 342.266449  | 1808.482509 | 496.6214905 |
|      | 2376.26001  | 585.6074219 | 2662.18365  | 566.5366821 | 3259.747683 | 618.4908447 |
|      | 2152.106634 | 544.65802   | 2877.987384 | 528.524353  | 3315.897945 | 622.8165283 |
|      | 986.7309095 | 296.319458  | 2574.686114 | 478.8855286 | 2759.729065 | 633.7468262 |
|      | 2392.080484 | 571.2277222 | 1443.536222 | 431.2506714 | 3069.725758 | 668.0814209 |
|      | 2355.040077 | 450.3274231 | 3942.994368 | 521.5661011 | 4053.442741 | 779.2977905 |
|      | 2510.815378 | 423.8169861 | 1072.188099 | 433.1319885 | 3250.619957 | 904.9210815 |
|      | 2149.302403 | 418.9737549 | 1520.654871 | 434.9227295 | 4262.738419 | 793.7054443 |
|      | 4308.55951  | 434.5342712 | 2329.763824 | 469.8653564 | 2672.984189 | 676.5375366 |
|      | 1436.552089 | 374.2736511 | 1573.757861 | 436.9129028 | 3265.033302 | 700.6334839 |
|      | 2205.227046 | 390.6344604 | 2302.191628 | 378.6685486 | 4050.391087 | 634.7423096 |
|      | 2380.931992 | 370.3499146 | 2642.070387 | 526.4685669 | 3219.976575 | 678.998291  |
| 2014 | 3511.608104 | 471.5272522 | 2672.764767 | 885.4597778 | 3506.017191 | 670.3974609 |
|      | 3928.192786 | 493.9429626 | 2324.442054 | 527.187561  | 2898.955606 | 665.9820557 |
|      | 4281.276675 | 491.0727234 | 3820.695152 | 833.9017334 | 4108.419544 | 802.1125488 |
|      | 3422.806905 | 448.1541748 | 4359.855908 | 799.5639038 | 3466.31739  | 784.9901733 |
|      | 2648.942528 | 435.889801  | 4349.066432 | 779.2977905 | 2924.268751 | 602.3389893 |
|      | 3371.350068 | 432.9024353 | 2881.293094 | 907.9581909 | 3124.898222 | 556.3215942 |
|      | 1635.392365 | 360.4409485 | 2487.020606 | 670.1282959 | 4771.044079 | 693.5760498 |
|      | 1712.645383 | 359.4419556 | 3006.993021 | 661.295105  | 3783.963571 | 648.3158569 |
|      | 2463.831793 | 379.6952515 | 2787.007531 | 661.1873779 | 2216.538508 | 731.1636353 |
|      | 1518.380677 | 363.4547119 | 3792.472275 | 821.0463867 | 2728.054451 | 677.6035156 |
|      | 1715.608117 | 363.6096802 | 4093.671559 | 828.1882935 | 2916.272405 | 665.9820557 |
|      | 4050.492502 | 567.5611572 | 3452.02451  | 637.5570679 | 4670.310416 | 833.9951782 |
|      | 3891.728165 | 579.201416  | 3265.033302 | 700.6334839 | 2846.610634 | 670.5938721 |
|      | 3183.7785   | 450.7710876 | 3879.213766 | 634.9004517 | 3024.432907 | 668.6193237 |
|      | 2533.79964  | 526.4685669 | 2979.864373 | 675.2018433 | 2695.678912 | 671.7163086 |
|      | 3213.41568  | 540.355896  | 3145.78399  | 645.5705566 | 4368.219801 | 816.0332031 |
|      | 1072.188099 | 433.1319885 | 2129.733015 | 523.4124756 | 2307.144293 | 566.215332  |
|      | 1780.865929 | 433.5471497 | 2451.576109 | 520.0662842 | 3394.476829 | 492.1672668 |
|      | 939.0450719 | 434.4341736 | 2297.473342 | 527.7451172 | 1980.110688 | 536.1378784 |
|      | 823.5070633 | 371.5352478 | 2827.970713 | 596.6723022 | 2686.366384 | 524.0961304 |
|      | 991.3502056 | 373.9647522 | 2174.984354 | 589.272583  | 4305.473668 | 794.0094604 |
|      | 1960.857032 | 356.7543945 | 2297.181632 | 588.7799683 | 4732.539229 | 863.925354  |
|      | 953.5241054 | 348.008728  | 2443.434222 | 659.9842529 | 3938.916642 | 823.2260132 |
|      | 1254.472174 | 356.7033997 | 2783.882514 | 661.3166504 | 2406.181819 | 678.079895  |

|      |             |             |             |             |             |             |
|------|-------------|-------------|-------------|-------------|-------------|-------------|
|      | 870.5413263 | 347.4068604 | 4075.994935 | 666.8692627 | 2854.11841  | 674.4385986 |
|      | 928.0453278 | 341.0230713 | 3316.247994 | 702.8435059 | 2406.181819 | 678.079895  |
|      | 870.5413263 | 347.4068604 | 3121.139219 | 756.7160034 | 1962.736293 | 483.3887634 |
|      | 3157.170098 | 497.2593994 | 3335.871416 | 741.4879761 | 2020.337213 | 367.0780945 |
|      | 4029.824151 | 503.6458435 | 2826.248786 | 664.8956299 | 4953.986429 | 523.2390747 |
|      | 4959.557707 | 540.7374878 | 3216.550981 | 645.4158936 | 5442.711093 | 559.3424072 |
|      | 4097.470476 | 525.0829468 | 4376.386165 | 784.1495361 | 3957.025531 | 546.8471069 |
|      | 2704.489309 | 457.7251892 | 3067.716766 | 866.092041  | 2898.865036 | 510.6756287 |
|      | 1931.247588 | 425.7374878 | 4944.48371  | 821.8763428 | 2566.67393  | 364.5552063 |
|      | 1720.109868 | 461.011322  | 3340.404077 | 827.7608643 | 3263.28827  | 587.4381714 |
|      | 2968.041538 | 587.4242554 |             |             |             |             |
|      | 1844.966915 | 292.0023804 | 4258.133072 | 493.9533386 | 4895.48902  | 455.2460022 |
|      | 2025.756318 | 635.5109863 | 3171.508889 | 488.0149536 | 4623.833951 | 458.2843628 |
|      | 4973.690395 | 679.6034546 | 2108.860311 | 241.5618896 | 4895.48902  | 455.2460022 |
|      | 3220.729231 | 607.2470093 | 1445.945144 | 237.925415  | 1056.178877 | 240.9376984 |
|      | 3385.265989 | 381.9732971 | 5077.500607 | 458.0847168 | 4142.301396 | 470.5297546 |
|      | 1889.655767 | 472.7325439 | 4814.387662 | 489.1402893 | 1001.962131 | 241.5618896 |
|      | 2783.882514 | 661.3166504 | 5539.256268 | 496.9952698 | 2052.015702 | 357.7977295 |
|      | 1899.890021 | 286.92453   | 4010.438221 | 441.2325439 | 1890.189638 | 229.8616791 |
|      | 4310.537296 | 427.3422241 | 6261.111639 | 506.8675842 | 2100.670769 | 249.2912903 |
|      | 2196.539695 | 380.8634949 | 4281.526517 | 478.5939941 | 1918.043937 | 246.7303925 |
|      | 1737.695091 | 351.6882935 | 1798.045026 | 319.5221558 | 1772.838524 | 256.9204102 |
|      | 1987.903387 | 495.4725037 | 1392.28032  | 311.2037048 | 1580.144323 | 446.2995911 |
|      | 2528.642845 | 365.263855  | 1990.613433 | 309.6186523 | 3659.687664 | 704.6670532 |
|      | 1952.803463 | 346.239502  | 960.5453611 | 308.3846436 | 3788.573552 | 624.4852905 |
|      | 3127.623881 | 420.7345886 | 2336.904518 | 306.4540405 | 2071.597714 | 341.2253418 |
|      | 1754.65973  | 349.036499  | 3797.709912 | 450.3930054 | 3584.346001 | 654.4058228 |
| 2015 | 3012.426965 | 417.4532776 | 4114.225129 | 472.5580444 | 4363.751143 | 626.2175293 |
|      | 2939.001166 | 409.9397888 | 3693.193049 | 503.5671692 | 4113.075956 | 624.8327026 |
|      | 2366.144753 | 328.6063232 | 2095.760925 | 453.2653503 | 3119.189549 | 740.4251099 |
|      | 3274.242539 | 395.7633362 | 2062.287493 | 295.2371521 | 2714.38893  | 478.6109009 |
|      | 2245.861649 | 407.8927002 | 1717.463794 | 279.494873  | 2978.178397 | 471.1795959 |
|      | 2560.655894 | 386.4118347 | 1574.855954 | 305.5751038 | 2619.738137 | 472.3110962 |
|      | 2209.377204 | 382.1197205 | 2110.140801 | 317.710907  | 2943.607452 | 623.0389404 |
|      | 3249.663519 | 396.2647705 | 4598.12659  | 459.6755981 | 4287.405122 | 684.1331177 |
|      | 1241.374418 | 351.6882935 | 4918.385691 | 470.9379883 | 3888.764923 | 690.8480835 |
|      | 1966.084569 | 495.4725037 | 4862.48426  | 456.0976563 | 3493.536337 | 521.1824951 |
|      | 2731.186636 | 336.8255615 | 4563.879908 | 485.2520142 | 3033.102169 | 476.5257568 |
|      | 3422.645807 | 423.4972534 | 2374.092596 | 466.73349   | 3766.134635 | 442.8790588 |
|      | 4592.183054 | 437.4066162 | 2321.605057 | 333.5266418 | 3279.149289 | 446.8108521 |
|      | 4919.958976 | 440.0608215 | 1786.035493 | 247.562851  | 1600.653277 | 341.5599365 |
|      | 3198.645703 | 408.1442871 | 3108.194858 | 248.2897797 | 2697.044616 | 460.6797485 |
|      | 2747.931701 | 397.3244019 | 2539.309688 | 452.1888733 | 2324.663637 | 454.6447449 |
|      | 2912.708273 | 394.5899048 | 2502.284866 | 450.8648987 | 2767.957617 | 454.3171692 |

|             |             |             |             |             |             |
|-------------|-------------|-------------|-------------|-------------|-------------|
| 1029.644421 | 331.1760559 | 3109.749589 | 450.8648987 | 3031.483698 | 469.459198  |
| 1235.679226 | 330.6701355 | 3599.854761 | 546.5733032 | 2041.987847 | 471.4547729 |
| 1665.555378 | 336.0951538 | 2268.809229 | 307.8763123 | 2041.987847 | 471.4547729 |
| 2242.171578 | 342.4923096 | 2607.098382 | 469.662384  | 2826.587941 | 553.883606  |
| 1542.575675 | 333.9358826 | 2879.346308 | 472.0566101 | 3662.726335 | 590.4859619 |
| 1075.554159 | 333.5438843 | 4351.986733 | 490.5159607 | 3493.394932 | 511.4523621 |
| 4291.98732  | 636.6085815 | 3568.555382 | 626.3422241 | 3587.743223 | 535.5413208 |
| 2246.06474  | 495.1708984 | 2137.704344 | 490.4897461 | 3440.09798  | 703.3884888 |
| 3493.536337 | 521.1824951 | 2640.878059 | 533.7706299 | 4822.543457 | 680.147644  |
| 2470.604791 | 472.7546387 | 2870.558753 | 507.4889832 | 3255.103256 | 681.8660889 |
| 3070.101161 | 479.3640442 | 3974.827699 | 508.0019836 | 4487.660764 | 722.1955566 |
| 1940.610746 | 343.5487366 | 4271.833318 | 468.321167  | 2022.234715 | 464.9112244 |
| 2932.708963 | 327.708252  | 2185.310609 | 547.8240967 | 2127.185474 | 461.6578674 |
| 1782.680993 | 312.6291504 | 2284.938744 | 485.8886414 | 2022.234715 | 464.9112244 |
| 4093.00484  | 673.367981  | 3019.0663   | 561.8538208 | 1976.225334 | 321.7141113 |
| 4113.200963 | 680.4984741 | 4919.870627 | 672.7088013 | 1992.352976 | 321.6038513 |
| 3406.244029 | 741.4824219 | 2380.667958 | 572.1251221 | 3830.543873 | 510.3166504 |
| 3159.864817 | 561.8538208 | 2640.323877 | 571.1109009 | 2361.030854 | 518.1148682 |
| 4792.191157 | 642.8661499 | 3192.734087 | 573.366272  | 2571.930549 | 517.3681641 |
| 2453.785155 | 529.2006226 | 2287.258122 | 477.480011  | 2959.643464 | 515.5046387 |
| 3040.540357 | 606.4053345 | 4907.251576 | 653.5945435 | 4370.107368 | 624.8327026 |
| 3895.713053 | 684.5405884 | 5339.811606 | 664.5755615 | 3301.400542 | 737.949585  |
| 2657.825439 | 485.5749512 | 1528.473168 | 419.4890747 | 3589.957638 | 527.4078369 |
| 1993.567034 | 498.4719849 | 1828.220963 | 329.2684631 |             |             |

#### Text S1: The workings of Machine Learning algorithms.

##### RF:

- (1) The grassland biomass is used as the output variable of the model, and the environmental variable is used as the input variable (attribute value) of the model to form the training data set D.
- (2) Using the Bootstrap method to resample the training sample set, randomly generate k training subsets  $D_k$ , and establish the corresponding k decision trees.
- (3) Randomly extract M features from the original features as the split feature set of nodes.
- (4) Train the training subset  $D_k$ , and make each regression tree stop growing after meeting the segmentation termination condition through the decision tree judgment and branch pruning rules, and finally combine all regression trees to form a random forest.
- (5) Calculate the average value of grassland biomass prediction according to the prediction results of k decision trees.

##### SVM:

The model training samples consist of a subset of positive samples ( $y_i=1$ ) and a subset of negative samples ( $y_i=-1$ ). The training goal is to find an optimal hyperplane and classify the samples accurately. Among them, the data points closest to the decision surface are called support vectors. As shown below. When the support vector machine is used to deal with the regression problem, firstly given the training sample set  $(x_i, y_i)$ ,  $i=1, 2, \dots, l$ , there is a linear regression function:

$$y = w \cdot x + b, \quad (1)$$

where  $w$  and  $b$  are the normal vector and intercept of the hyperplane, respectively.

Finding optimal parameters can be transformed into solving the following optimization conditional problems.

$$\begin{cases} \min \left[ \frac{1}{2} \|w\|^2 + C \sum_{i=1}^l (\xi_i + \xi_i^*) \right] \\ \text{s.t.} \begin{cases} y_i - w \cdot x_i + b \leq \varepsilon + \xi_i \\ w \cdot x_i - y_i + b \leq \varepsilon + \xi_i^* \end{cases} \end{cases}, \quad (2)$$

In the formula,  $C$  is the penalty factor;  $\varepsilon$  is the regression accuracy, which is used to control the size of the error;  $\xi_i (\geq 0)$ ,  $\xi_i^* (\geq 0)$  are relaxation factors.

The Lagrange multiplier  $a_i$  is introduced, and the original problem can be changed to solve after transformation and solution:

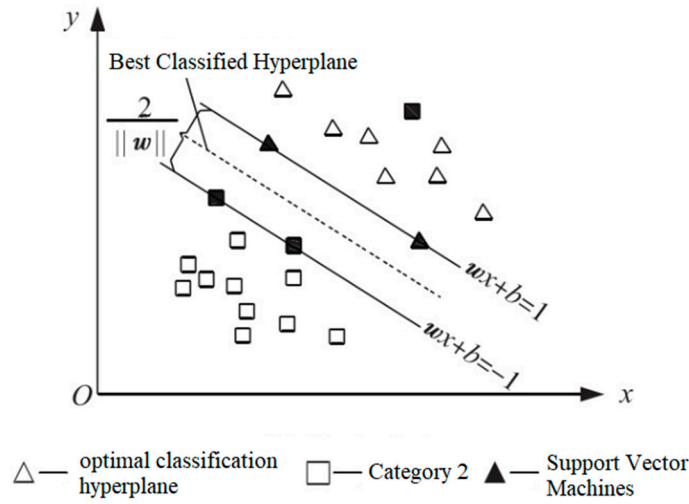

$$\begin{aligned} \min & \left[ \frac{1}{2} \sum_{i,j=1}^l (a_i - a_i^*)(a_j - a_j^*)(x_i, x_j) \right. \\ & \left. + \sum_{i=1}^l a_i^*(\varepsilon + y_i) + \sum_{i=1}^l a_i(\varepsilon - y_i) \right], \end{aligned} \quad (3)$$

$$\text{s.t.} \begin{cases} \sum_{i=1}^l (a_i - a_i^*) = 0 \\ a_i, a_i^* \in [0, C] \end{cases}. \quad (4)$$

#### GBDT:

(1) Initialize the weak learner, and calculate the decision tree with only 1 root node by initialization:

$$f_0(x) = \underset{c}{\operatorname{argmin}} \sum_{i=1}^N L(y_i, c) \quad (5)$$

$L(y_i, c)$  loss function, the number of  $N$  training samples, the  $i$ th sample in the  $y_i$  training sample set, the  $c$  loss function minimizes the constant value.

(2) Calculate the residual error: set the number of iterations  $m=1, 2, \dots, M$ , calculate the residual error for each training sample.

$$r_{im} = - \left[ \frac{\partial L[y_i, f(x_i)]}{\partial f(x_i)} \right]_{f(x) = f_{m-1}(x)} \quad (6)$$

$f(x)$  objective function,  $i$ -th sample attribute of  $x_i$ ,  $f_{m-1}(x)$   $m-1$ -th decision tree.

- (3) Take the calculated residual value as the real value of the next training, and take the data  $(x_i, r_{im})$ ,  $i=1, 2, \dots, N$  as the sample data for the next training, and get a tree with  $j(j=1, 2, \dots, J)$  leaf nodes, and the leaf nodes are distributed in the leaf node area  $R_{mj}$  regression tree
- (4) Calculate the best fit value of the leaf area.

$$c_{mj} = \operatorname{argmin}_c \sum_{x_i \in R_{mj}} L[y_i, f_{m-1}(x_i + c)] \quad (7)$$

- (5) Update the strong learner.

$$f_m(x) = f_{m-1}(x) + \sum_{j=1}^J c_{mj} I(x \in R_{mj}) \quad (8)$$

- (6) Accumulate to obtain the final regression tree.

$$F(x) = \sum_{m=1}^M \sum_{j=1}^J c_{mj} I(x \in R_{mj}) \quad (9)$$

#### BP:

BP network consists of input layer, hidden layer and output layer. Taking the three-layer perceptron as an example, its structure is shown in the figure.

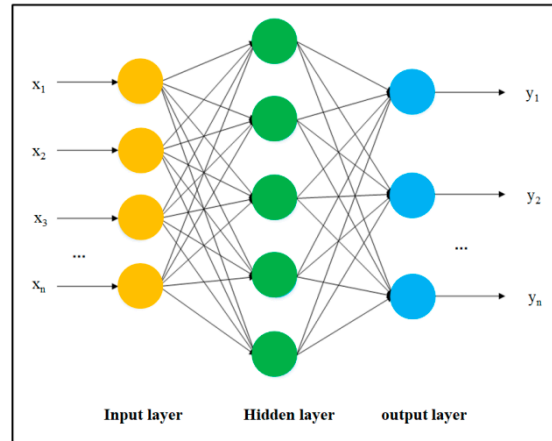

output layer error:

$$E = \frac{1}{2} (s - Z)^2 = \frac{1}{2} \sum_{k=1}^l (s_k - Z_k)^2 \quad (10)$$

hidden layer error:

$$E = \frac{1}{2} \sum_{k=1}^l (s_k - f(net_k))^2 = \frac{1}{2} \sum_{k=1}^l \left( s_k - f \left( \sum_{j=1}^m w_{kj} y_j \right) \right)^2 \quad (11)$$

input layer error:

$$\begin{aligned}
E &= \frac{1}{2} \sum_{k=1}^l \left( s_k - f \left[ \sum_{j=0}^m w_{jk} f(\text{net}_j) \right] \right)^2 \\
&= \frac{1}{2} \sum_{k=1}^l \left( s_k - f \left[ \sum_{j=0}^m w_{jk} f \left( \sum_{i=1}^n v_{ij} x_i \right) \right] \right)^2
\end{aligned} \tag{12}$$

$s$  is the actual value;  $Z$  is the predicted value; then  $s-Z$  is the error;  $w$  is the weight of a node;  $y$  is the output of a node;  $m$  neurons

The sum of errors of 1 to 1 output layer nodes is the overall error of the output layer of the neural network.

The output layer error is forwarded back, and the output layer node performs the transformation of the  $f(\text{net}_k)$  activation function, then  $Z=f(\text{net}_k)$  is brought into the formula (10) to obtain the formula (11).

In the process of backpropagation, according to the linear change of neurons and the transformation of activation function, it can be obtained:

$$Z_k = f(\text{net}_k) = f \left( \sum_{j=1}^m w_{jk} y_j \right) = f \left[ \sum_{j=0}^m w_{jk} f(\text{net}_j) \right] = f \left[ \sum_{j=0}^m w_{jk} f \left( \sum_{i=1}^n v_{ij} x_i \right) \right] \tag{13}$$

In order to make the error  $E$  smaller and smaller, the stochastic gradient descent algorithm can be used to solve the  $w$  and  $v$ , that is, let the obtained  $w$  and  $v$  minimize the error  $E$ , and  $\eta$  is the fixed learning rate given during initialization.

$$\Delta w_{jk} = -\eta \frac{\partial E}{\partial w_{jk}} \quad j = 0, 1, 2, \dots, m; \quad k = 1, 2, \dots, l \tag{14}$$

$$\Delta v_{ij} = -\eta \frac{\partial E}{\partial v_{ij}} \quad i = 0, 1, 2, \dots, n; \quad j = 1, 2, \dots, m \tag{15}$$

## References

1. Huete, A.R. A soil-adjusted vegetation index (SAVI). *Remote Sens. Environ.* **1988**, *25*, 295–309.
2. Qi, J.; Chehbouni, A.; Huete, A.R.; Kerr, Y.H.; Sorooshian, S. A modified soil adjusted vegetation index. *Remote Sens. Environ.* **1994**, *48*, 119–126.
3. Steven, M.D. The Sensitivity of the OSAVI Vegetation Index to Observational Parameters. *Remote Sens. Environ.* **1998**, *63*, 49–60.
4. Marsett, R.C.; Qi, J.; Heilman, P.; Biedenbender, S.H.; Watson, M.C.; Amer, S.; Weltz, M.; Goodrich, D.; Marsett, R. Remote Sensing for Grassland Management in the Arid Southwest. *Rangel. Ecol. Manag.* **2006**, *59*, 530–540.
5. Guerschman, J.P.; Hill, M.J.; Renzullo, L.J.; Barrett, D.J.; Marks, A.S.; Botha, E.J. Estimating fractional cover of photosynthetic vegetation, non-photosynthetic vegetation and bare soil in the Australian tropical savanna region upscaling the EO-1 Hyperion and MODIS sensors. *Remote Sens. Environ.* **2009**, *113*, 928–945.
6. Jin, Y.; Yang, X.; Qiu, J.; Li, J.; Gao, T.; Wu, Q.; Zhao, F.; Ma, H.; Yu, H.; Xu, B. Remote Sensing-Based Biomass Estimation and Its Spatio-Temporal Variations in Temperate Grassland, Northern China. *Remote Sens.* **2014**, *6*, 1496–1513.
7. Deng, Y.; Wu, C.; Li, M.; Chen, R. RNDISI: A ratio normalized difference soil index for remote sensing of ur-ban/suburban environments. *Int. J. Appl. Earth Obs. Geoinf.* **2015**, *39*, 40–48.
8. McFEETERS, S.K. The use of the Normalized Difference Water Index (NDWI) in the delineation of open water features. *Int. J. Remote Sens.* **1996**, *17*, 1425–1432.
9. Mircholi, F.; Kiani-Harchegani, M.; Darvishan, A.K.; Falahatkar, S.; Sadeghi, S.H. Spatial distribution dependency of soil organic carbon content to important environmental variables. *Ecol. Indic.* **2020**, *116*, 106473.
10. Deering, D.W., Jr.; Haas, R.H.; Schell, J.A. Measuring “forage production” of grazing units from landsat mss data. *Mathematics* **1975**, *2*, 1169–1178.
11. Gitelson, A.A.; Kaufman, Y.J.; Merzlyak, M.N. Use of a green channel in remote sensing of global vegetation from EOS-MODIS. *Remote Sens. Environ.* **1996**, *58*, 289–298.
12. Kheir, R.B.; Greve, M.H.; Bocher, P.K.; Greve, M.B.; Larsen, R.; McCloy, K. Predictive mapping of soil organic carbon in wet cultivated lands using classification-tree based models: The case study of Denmark. *J. Environ. Manag.* **2010**, *91*, 1150–1160.
13. Damien, C.J.; Laurent, K.; Pierre, H.; Eric, M.; Pierre, D. Monitoring dry vegetation masses in semi-arid areas with MODIS SWIR bands. *Remote Sens. Environ.* **2014**, *153*, 40–49.
